1 **Analysis of 16S rRNA gene sequence of nasopharyngeal exudate from healthy donors reveals**  
2 **changes in key microbial communities associated with aging**

3  
4 Sergio Candel<sup>1,2,3,\*</sup>, Fernando Pérez-Sanz<sup>2</sup>, Sylwia D. Tyrkalska<sup>1,2,3</sup>, Antonio Moreno-Docón<sup>4</sup>,  
5 Ángel Esteban<sup>2</sup>, María L. Cayuela<sup>2,3,5,\*</sup>, Victoriano Mulero<sup>1,2,3,\*,&</sup>

6  
7 <sup>1</sup>Grupo de Inmunidad, Inflamación y Cáncer, Departamento de Biología Celular e Histología,  
8 Facultad de Biología, Universidad de Murcia, 30100 Murcia, Spain.

9 <sup>2</sup>Instituto Murciano de Investigación Biosanitaria (IMIB)-Arrixaca, 30120 Murcia, Spain.

10 <sup>3</sup>Centro de Investigación Biomédica en Red de Enfermedades Raras (CIBERER), Instituto de  
11 Salud Carlos III, 28029 Madrid, Spain.

12 <sup>4</sup>Servicio de Microbiología, Hospital Clínico Universitario Virgen de la Arrixaca, 30120 Murcia,  
13 Spain.

14 <sup>5</sup>Grupo de Telomerasa, Cáncer y Envejecimiento, Servicio de Cirugía, Hospital Clínico  
15 Universitario Virgen de la Arrixaca, 30120 Murcia, Spain.

16  
17 \*To whom correspondence should be sent at: [scandel@um.es](mailto:scandel@um.es) (SC), [marialcayuela@carm.es](mailto:marialcayuela@carm.es)  
18 (MLC), [vmulero@um.es](mailto:vmulero@um.es) (VM).

19 &Lead contact.

20

21

22

## 23 ABSTRACT

24 **Background:** Functional or compositional perturbations of the microbiome can occur at different  
25 sites of the body and this dysbiosis has been linked to various diseases. Changes in the  
26 nasopharyngeal microbiome are associated to patient's susceptibility to multiple viral infections,  
27 including COVID-19, supporting the idea that the nasopharynx may be playing an important role  
28 in health and disease. Most studies on the nasopharyngeal microbiome have focused on a specific  
29 component in the lifespan, such as infancy or the elderly, or have other limitations such as low  
30 sample sizes. Therefore, detailed studies analyzing the age- and sex-associated changes in the  
31 nasopharyngeal microbiome of healthy people across their whole life are essential to understand  
32 the relevance of the nasopharynx in the pathogenesis of multiple diseases, particularly viral  
33 infections such as COVID-19.

34 **Results:** 120 nasopharyngeal samples from healthy subjects of all ages and both sexes were  
35 analyzed by 16s rRNA sequencing. Nasopharyngeal bacterial alpha diversity did not vary in any  
36 case between age or sex groups. Proteobacteria, Firmicutes, Actinobacteria, and Bacteroidetes  
37 were the predominant phyla in all the age groups, with several sex-associated differences probably  
38 due to the different levels of sex hormones between both sexes. *Acinetobacter*, *Brevundimonas*,  
39 *Dolosigranulum*, *Finexgoldia*, *Haemophilus*, *Leptotrichia*, *Moraxella*, *Peptoniphilus*,  
40 *Pseudomonas*, *Rothia*, and *Staphylococcus* were the only 11 bacterial genera that presented  
41 significant age-associated differences. Other bacterial genera such as *Anaerococcus*, *Burkholderia*,  
42 *Campylobacter*, *Delftia*, *Prevotella*, *Neisseria*, *Propionibacterium*, *Streptococcus*, *Ralstonia*,  
43 *Sphingomonas*, and *Corynebacterium* appeared in the population with a very high frequency,  
44 suggesting that their presence might be biologically relevant.

45 **Conclusions:** In contrast to other anatomical areas such as the gut, bacterial diversity in the  
46 nasopharynx of healthy subjects remains very stable and resistant to perturbations throughout the  
47 whole life and in both sexes. Age-associated changes in taxonomic composition were observed at  
48 phylum, family, and genus levels, as well as several sex-associated changes probably due to the  
49 different levels of sex hormones present in both sexes at certain ages. Our results provide a  
50 complete and valuable dataset that will be useful for future research aiming for studying the  
51 relationship between changes in the nasopharyngeal microbiome and susceptibility to or severity  
52 of multiple diseases, including COVID-19.

53 **Keywords:** Nasopharyngeal microbiome, Age differences, Sex differences, Aging, Human  
54 microbiome, 16s rRNA sequencing

55

## 56 INTRODUCTION

57 Among the remaining challenges in biomedical sciences, one of the most important is to  
58 fully understand how aging affects human biological processes, health, and wellness. In recent  
59 years, solid evidence has been found to support the idea that the microbial communities that inhabit  
60 the different anatomical areas of the human body could play a key role in these processes, and  
61 there has been much speculation about possible medical interventions <sup>1-6</sup>. Although most research  
62 has focused on the well-studied gut microbiome, there is growing evidence that variations in  
63 microbial communities in other sites of the body are also responsible for wide-ranging health  
64 effects <sup>7-11</sup>. The case of the respiratory tract is curious, since the lungs were long believed to be  
65 sterile, despite the fact that they are constantly exposed to microorganisms in inhaled air and the  
66 upper respiratory tract <sup>12</sup>, which has been the main cause that the respiratory microbiome has barely  
67 been studied until very recently <sup>13</sup>. However, new culture-independent microbial identification  
68 techniques, such as metagenomics, have revealed that the respiratory tract is a dynamic ecosystem  
69 and has raised the interest of the scientific community in the role of the respiratory microbiota in  
70 health and disease <sup>12,13</sup>.

71 The human upper respiratory tract, that comprises the anterior nares, nasal cavity, sinuses,  
72 nasopharynx, Eustachian tube, middle ear cavity, oral cavity, oropharynx, and larynx, is the major  
73 portal of entry for infectious droplet or aerosol-transmitted microorganisms <sup>14</sup>. Among these  
74 different areas, the nasopharynx is anatomically unique because it presents a common meeting  
75 place for the ear, nose, and mouth cavities <sup>15</sup>, but has not gained special prominence until the  
76 outbreak of the current COVID-19 pandemic <sup>16</sup>. Nasopharyngeal swabs from COVID-19 patients  
77 present higher viral loads and diagnostic sensitivities than oropharyngeal <sup>17</sup>, anterior nares, <sup>18</sup> and  
78 throat <sup>19</sup> swabs, suggesting the relevance of the nasopharyngeal epithelium as a portal of initial  
79 infection and transmission of SARS-CoV-2. Thus, the nasopharynx has become the main  
80 anatomical area from which samples are collected for SARS-CoV-2 viral testing worldwide.  
81 Importantly, dozens of studies have already found unquestionable correlations between the  
82 composition of the nasopharyngeal microbiota and susceptibility to different viral infections in

83 humans<sup>13</sup>, and there is beginning to be some evidence, although still controversial, that it may be  
84 playing a role in the susceptibility to SARS-CoV-2 infection too<sup>20,21</sup>. Elucidating this might shed  
85 light on the still unexplained fact that some COVID-19 patients, such as the elderly, are more  
86 susceptible and present more severe forms of COVID-19 than others<sup>22</sup>.

87 Large cohort studies of human microbiome data with appropriate controls are particularly  
88 valuable, especially of all ages and both sexes, as these datasets are difficult to obtain due to  
89 multiple factors, including our long lifespans, heterogeneity in consent and other sample access  
90 issues, and because of socioeconomic confounds. Therefore, human studies have tended to focus  
91 on a specific component of the lifespan, such as infancy, or studies of the elderly, rather than  
92 examining variation across an entire population. Knowledge about the relationships between  
93 changes in the nasopharyngeal microbiota and susceptibility to viral infections is a good example  
94 of this, since most studies have focused only on children<sup>13</sup>. Interestingly, the case of COVID-19  
95 is not an exception, and the controversy over whether changes in the nasopharyngeal microbiome  
96 affect disease severity at different ages is probably because most studies present important  
97 limitations, such as low sample sizes or focusing only on a specific life stage. Thus, while some  
98 studies revealing changes in the nasopharyngeal microbiome of COVID-19 patients do not present  
99 appropriate uninfected controls<sup>21</sup> or have been performed only in children<sup>20</sup>, others that do not  
100 find any relevant microbiome alterations have low sample sizes<sup>23,24</sup>.

101 A crucial factor to consider in studies of variation across the lifespan is sex as a biological  
102 variable. For aging research, this includes the understanding that females and males may have  
103 different aging trajectories<sup>25-27</sup>, including in key systems such as the digestive tract. For example,  
104 the gut microbiome and sex hormones may interact to predispose women to autoimmune diseases  
105<sup>28</sup> and dietary interventions are known to have sex-specific effects on gut microbiota<sup>29</sup>. There are  
106 no studies analyzing the possible sex-associated differences in the nasopharyngeal microbiome at  
107 different life stages.

108 Here, we analyze in 120 healthy individuals of all ages and both sexes, for the first time,  
109 the diversity and taxonomic composition of the nasopharyngeal microbiota across the whole  
110 lifespan, the taxonomic changes in the nasopharynx associated to age or sex, and the possible  
111 biological relevance of several taxa whose frequency of appearance in the population is high. We  
112 therefore provide a very comprehensive and valuable dataset, that will be the base for future

113 research aimed at identifying relationships between age- and sex-associated changes in  
114 nasopharyngeal microbiome and susceptibility to or severity of the diseases of interest, including  
115 COVID-19.

116

## 117 RESULTS

### 118 Data annotation and samples overview

119 A total of 120 nasopharyngeal microbiomes from 120 healthy individuals were analyzed.  
120 A total of 4,538,196 high-quality 16S rRNA sequences ranging from 10,627 to 256,449 sequences  
121 per sample (mean = 37,818.3; median = 33,169) were obtained after quality control analyses and  
122 OUT filtering. The 16S rRNA sequences were binned into 128 families, 250 genera and 561  
123 species. The most abundant families were Staphylococcaceae (12.14%), Burkholderiaceae  
124 (11.52%), Carnobacteriaceae (11.48%) and Corynebacteriaceae (9.47%). The most abundant  
125 genera were *Staphylococcus* (13.06%), *Dolosigranulum* (11.99%), *Corynebacterium* (10.18%)  
126 and *Ralstonia* (10.08%). The most abundant species were *Dolosigranulum pigrum* (24.55%),  
127 *Ralstonia pickettii* (19.02%), *Corynebacterium pseudodiphtheriticum* (4.87%) and  
128 *Propionibacterium acnes* (4.85%). We excluded one sample with an abnormally high proportion  
129 of *Chlamydophila*, which is an indication of an abnormal sampling or pathological disorder of this  
130 individual 'C\_A1\_M8' (data not shown). To reveal age-related progression of nasopharyngeal  
131 microbiota, we divided the samples into 6 age groups, each divided into females and males to be  
132 able to also study possible sex-associated differences (Table S1). There were 20 samples in each  
133 age group and 10 samples in each sex group within them, except for the first age group (A1: 1-20  
134 years) where one male had to be excluded as indicated above (Table S1).

135 We performed Principal Component Analysis (PCA) to visualize the taxonomic patterns  
136 of these samples in a low-dimension space based on the relative abundance matrix of the 250  
137 genera across the 119 samples. Thus, the top two principal components explained 17.68% and  
138 10% of the variance of the original data, respectively (Fig. 1). As shown in Fig. 1, the samples  
139 from individuals younger than 41 and older than 70 years were scattered loosely, while the rest of  
140 samples appeared mostly intermixed. However, the samples did not form distinct clusters when  
141 viewed using this linear approach. Something similar was found when focusing on possible

142 differences between the two sexes, as samples from females and males also appeared completely  
143 intermixed and did not form any groups (Fig. 1).

144

### 145 **Bacterial diversity in the nasopharynx of healthy individuals is stable throughout lifespan**

146 The fact that significant changes in bacterial diversity throughout life had previously been  
147 described in the well-studied gut microbiota of healthy individuals<sup>30</sup>, prompted us to test whether  
148 similar changes occur in the nasopharynx by analyzing the alpha diversity, referred to as within-  
149 community diversity<sup>31</sup>, for the different age and sex groups established for this study (Table S1).  
150 However, the Shannon's diversity index, which measures evenness and richness of communities  
151 within a sample, did not show any statistically significant changes in bacterial diversity among the  
152 different age groups (Fig. 2a). Moreover, alpha diversity also did not vary as a function of sex  
153 when the Shannon index was calculated considering all individuals of all ages included in this  
154 study (Fig. 2b), nor when the same analysis was performed comparing females and males within  
155 each age group (Fig. 2c). The use of other indexes commonly used to measure alpha diversity,  
156 such as the inverse Simpson's diversity index, which is an indication of the richness in a  
157 community with uniform evenness that would have the same level of diversity (Fig. S1), or the  
158 Chao1 index, which measures the total richness of communities within a sample (Fig. S2),  
159 confirmed the absence of any statistically significant differences in bacterial diversity between the  
160 different age groups (Fig. S1a and S2a) or between females and males (Fig. S1b-c and S2b-c).  
161 Therefore, all these results together suggest that contrary to what occurs in other anatomical areas,  
162 such as the gut where bacterial diversity decreases with aging<sup>30</sup>, it remains stable in the  
163 nasopharynx of healthy people over time, without notable changes at any stage of life, not even in  
164 very young people or in the elderly over 70 years of age (Fig. 2a, S1a and S2a). Curiously, another  
165 interesting finding provided by this work, for the first time, is that there are no significant  
166 differences when comparing bacterial diversity in the nasopharynx of healthy females and males  
167 (Fig. 2b-c, S1b-c, and S2b-c), regardless of the stage of life studied and the important hormonal  
168 differences that exist between both sexes at certain ages.

169

## 170 **Aging- and sex-associated changes in compositional structure of nasopharyngeal** 171 **microbiome in healthy individuals**

172 To determine differences in nasopharyngeal taxonomic composition among age and sex  
173 classes, we compared the nasopharyngeal microbiome of healthy women and men in the six  
174 different age groups established for this study (Table S1). A first general analysis at the phylum  
175 level revealed that Firmicutes and Proteobacteria relative abundances showed opposite kinetics  
176 with aging (Fig. 3a-f): while the relative abundance of Firmicutes, which is the majority phylum  
177 in the youngest individuals (50%) (Fig. 3a), clearly decreased with aging reaching its lowest values  
178 in subjects in their 50's and 60's (21% and 27%, respectively) (Fig. 3d-e), the relative abundance  
179 of Proteobacteria presented its lowest value in the youngest people (24%) (Fig. 3a) and increased  
180 in older individuals, peaking in subjects who are in their 50's (53%) (Fig. 3d). The relative  
181 abundance of other phyla, such as Actinobacteria, Bacteroidetes, Tenericutes, or Cyanobacteria,  
182 remained more stable throughout life (Fig. 3a-f). Moreover, when we continued working at the  
183 phylum level and looked for any differences between the nasopharyngeal taxonomic composition  
184 of females and males, we found that, interestingly, the results were almost identical for both sexes  
185 within the two age groups containing the youngest (1-20 years) (Fig. S3a) and oldest (> 70 years)  
186 (Fig. S3f) individuals. However, several differences between females and males were observed in  
187 other age groups, notably a higher relative abundance of Actinobacteria in males in their 20s and  
188 30s compared to females of the same age group (20% vs. 7%) (Fig. S3b), a higher relative  
189 abundance of Proteobacteria in males in their 40s compared to females of the same age group (46%  
190 vs. 29%) (Fig. S3c), a higher relative abundance of Proteobacteria in females in their 50s compared  
191 to males of the same age group (57% vs. 47%) (Fig. S3d), and a higher relative abundance of  
192 Firmicutes and lower of Actinobacteria in females in their 60s compared to males of the same age  
193 group (37% vs. 20% and 10% vs. 22%, respectively) (Fig. S3e). Therefore, the fact that there were  
194 differences between the nasopharyngeal taxonomic composition of females and males in most of  
195 the age groups studied (individuals between 21 and 70 years of age) (Fig. S3b-e), but not within  
196 the two age groups containing the youngest and oldest individuals (people between 1 and 20 and  
197 older than 70 years of age) (Fig. S3a and f), suggests that the different levels of sex hormones  
198 present in both sexes at different life stages might be modulating the taxonomic composition of  
199 the nasopharyngeal microbiome.



200 Next, we wanted to go further in this study and moved to the family level, finding that 24  
201 distinct bacterial families presented an average abundance  $> 1\%$  in at least one of the age groups  
202 studied (Fig. 3g). Our analyses revealed which was the dominant family in each of the age groups:  
203 Staphylococcaceae in A1, Carnobacteriaceae in A2, Staphylococcaceae in A3, Burkholderiaceae  
204 in A4, Streptococcaceae in A5, and Staphylococcaceae in A6 (Fig. 3g). Thus, it is curious that  
205 although Proteobacteria was the majority taxa in all the age groups when analyzing the  
206 nasopharyngeal taxonomic composition at the phylum level (Fig. 3a-f), the dominant family in all  
207 the age groups belongs to the Firmicutes phylum, except in the case of age group A4 where the  
208 family Burkholderiaceae, which belongs to the Proteobacteria phylum, was the most abundant taxa  
209 at family level (Fig. 3g). Differences in the relative abundance of some families were found when  
210 compared between age groups, but without following any easily interpretable pattern (Fig. 3g).  
211 Analysis of the nasopharyngeal taxonomic composition at the family level between age groups,  
212 but separately in females and males, did not show any relevant sex-associated differences between  
213 sexes regarding the dominant bacterial families in each age group compared to the results described  
214 above for both sexes together (Fig. 3g), excepting that Burkholderiaceae was the most abundant  
215 family in males of age group A3 instead of Staphylococcaceae, and that Corynebacteriaceae is the  
216 dominant family in males of age group A5 instead of Streptococcaceae (Fig. S4). As mentioned  
217 above when working with females and males together, differences in relative abundance were  
218 found in some families when comparing between different age groups in both sexes, but without  
219 following any easily interpretable patterns (Fig. S4). Visualization of the nasopharyngeal  
220 taxonomic composition at the family level of all the individuals included in this study showed that  
221 most of them had a very diverse microbiome, with a high number of families with relative  
222 abundance  $> 1\%$  (Fig. S5). However, a few individuals had one dominant family that represented  
223 the majority of their nasopharyngeal microbiomes; these families tended to be Burkholderiaceae,  
224 Carnobacteriaceae and Staphylococcaceae (Fig. S5).

225 Working at the genus level, we found that 24 bacterial genera presented an average  
226 abundance  $> 1\%$  in at least one of the age groups studied (Fig. 3h). Moreover, our results showed  
227 that *Staphylococcus* was the dominant genus in age group A1, *Dolosigranulum* in A2,  
228 *Staphylococcus* in A3 and A6, *Ralstonia* in A4, and *Streptococcus* in A5 (Fig. 3h). No relevant  
229 differences were found when comparing the nasopharyngeal taxonomic composition of females  
230 and males at the genus level within the age groups studied (Fig. S6). Similar to what was described



231 above at the family level, visualization of the nasopharyngeal taxonomic composition at the genus  
232 level of all individuals included in this study showed that most of them had a high number of  
233 genera with relative abundance  $> 1\%$ , with a few individuals presenting one dominant genus  
234 (mostly *Dolosigranulum* or *Staphylococcus*) that represented the majority of their nasopharyngeal  
235 microbiomes (Fig. S7). Next, we focused on those genera whose relative abundance were  
236 significantly different between the different age groups established in this study, as this could help  
237 us to identify changes in the nasopharyngeal taxonomic composition that are characteristic of  
238 aging. Thus, our analyses revealed that there were statistically significant differences (adjusted p-  
239 value  $< 0.05$ ) in relative abundance between the distinct age groups in 11 bacterial genera:  
240 *Acinetobacter*, *Brevundimonas*, *Dolosigranulum*, *Finegoldia*, *Haemophilus*, *Leptotrichia*,  
241 *Moraxella*, *Peptoniphilus*, *Pseudomonas*, *Rothia* and *Staphylococcus* (Fig. 4a and Table S2).  
242 Interestingly, most of these statistically significant differences in relative abundance between the  
243 age groups for the 11 mentioned genera were between age groups A1 or A6, which include  
244 individuals between 1 and 20 years of age and over 70 years old, respectively, and the rest of age  
245 groups (18 out of 37 cases for the age group A1 and 16 out of 37 cases for the age group A6)  
246 (Table S2). Among these statistically significant changes found, it should be noted that  
247 *Acinetobacter* was the only genus whose relative abundance in the nasopharynx clearly increased  
248 progressively throughout life, peaking in individuals older than 70 years of age (Fig. 4a and Table  
249 S2). In the cases of *Dolosigranulum* and *Rothia*, their relative abundance drastically increased and  
250 decreased, respectively, in individuals over 70 years of age, compared to middle-aged people in  
251 their 50s and 60s (Fig. 4a and Table S2). Changes among the different age groups of *Finegoldia*,  
252 *Leptotrichia* and *Haemophilus* were also interesting, as their relative abundance was markedly  
253 reduced in elderly people over 70 years of age, even though they were present at other ages  
254 throughout life, mainly during middle age (Fig. 4a and Table S2). The case of *Haemophilus* was  
255 particularly intriguing, as while its relative abundance was at least 10% of the nasopharyngeal  
256 microbiota composition in age groups A1-A5 (if we consider only these 11 genera that present  
257 statistically significant differences between age groups), it dramatically decreased in the group of  
258 individuals over 70 years old (Fig. 4a and Table S2). Furthermore, it is noteworthy that the  
259 bacterial genera *Brevundimonas*, *Finegoldia*, *Leptotrichia* and *Peptoniphilus* presented a very low  
260 relative abundance in the youngest individuals, who are between 1 and 20 years old, compared to  
261 other age groups (Fig. 4a and Table S2). Finally, although *Moraxella* and *Staphylococcus* showed

262 significant differences in relative abundance between the distinct age groups in several cases, these  
263 differences did not seem to follow any easily interpretable pattern relating relative abundance  
264 levels to a particular life stage (Fig. 4a and Table S2). Next, we wondered whether the significant  
265 differences in relative abundance between age groups observed for these 11 bacterial genera were  
266 due to sex-associated differences. Visualization of the nasopharyngeal taxonomic composition of  
267 females and males separately, considering only these 11 genera, showed no notable differences  
268 between both sexes (Fig. S8). The only exception was a higher relative abundance of  
269 *Dolosigranulum* in males in their 20s and 30s compared to females of the same age, because this  
270 genus was clearly dominant in 5 males from that age group while only in 1 female of the same age  
271 (Fig. S9). Besides this observation regarding *Dolosigranulum*, analyzing the taxonomic  
272 composition of all the individuals included in this study also revealed that in most people, 1 out of  
273 these 11 genera was dominant compared to the relative abundance of the other 10 genera (Fig. S9).  
274 Interestingly, 8 out of the 11 genera, excepting *Bevundimonas*, *Finegoldia* and *Peptoniphilus*, were  
275 found to be the dominant genus in at least 1 individual, demonstrating that nasopharyngeal  
276 taxonomic composition at this level can be very variable between different individuals, even if  
277 they belong to the same age or sex groups (Fig. S9 and S10).

278

### 279 **Identification of potentially biologically relevant bacterial genera by analyzing their** 280 **frequency of appearance in the nasopharynx of healthy individuals**

281 After analyzing the nasopharyngeal taxonomic composition at the phylum, family, and  
282 genus levels, looking for differences in relative abundance between age and sex groups, we decided  
283 to apply another strategy to try to identify bacterial genera whose presence in the nasopharynx  
284 might be characteristic of a certain life stage, independently on their abundance levels. Thus, based  
285 on the idea that in some cases the presence of a genus within a certain sex or age group but not in  
286 others can be biologically relevant, even if its abundance is low, we studied the frequency with  
287 which each genus appeared in the individuals included in this study by visualizing, for each genus,  
288 the percentage of people from each age group in which it is present. Firstly, we analyzed this in  
289 the 11 genera that presented significant differences between the distinct age groups, with the aim  
290 of checking whether these genera were present in a high percentage of individuals and, therefore,  
291 that the relative abundance results previously shown in Fig. 4a were reliable. Indeed, our results

292 showed that these 11 genera appear with a high frequency in the individuals included in this study,  
293 especially in the cases of *Acinetobacter*, *Dolosigranulum*, *Haemophilus*, *Moraxella*, *Pseudomonas*  
294 and *Staphylococcus* (Fig. 4b). These data also revealed that several genera, such as  
295 *Brevundimonas*, *Finegoldia* and *Peptoniphilus* appeared less frequently in the youngest people  
296 than in the other age groups, while the frequency of appearance of others, such as *Rothia*, decreases  
297 in the oldest people (Fig. 4b). Interestingly, it coincides that these genera that appear most  
298 frequently in the individuals included in this study are also the ones that appear most often as the  
299 dominant genus in the taxonomic composition of individuals (Fig. S9 and S10). Next, we identified  
300 several bacterial genera that could be biologically relevant as part of the nasopharyngeal  
301 microbiota although they did not show any significant differences in relative abundance between  
302 age or sex groups. This was (i) because their frequency of appearance in the nasopharynx of the  
303 healthy population was very high, as in the case of *Anaerococcus*, *Burkholderia*, *Campylobacter*,  
304 *Delftia*, *Prevotella*, *Neisseria*, *Propionibacterium*, *Streptococcus*, *Ralstonia*, *Sphingomonas* and  
305 *Corynebacterium* (Fig. 5a); (ii) because their frequency of appearance drastically increased with  
306 age, such as the cases of *Faecalibacterium*, *Stenotrophomonas* and *Phascolarctobacterium* (Fig.  
307 5b); or (iii) because their frequency of appearance drastically decreased with age, such as the cases  
308 of *Aggregatibacter*, *Gemella* and *Fusobacterium* (Fig. 5c).

309

## 310 DISCUSSION

311 Comparing bacterial species richness in the nasopharynx of healthy individuals in the  
312 different age groups established for this study and between females and males revealed no age- or  
313 sex-associated significant differences in alpha diversity. These results, which were confirmed by  
314 using three of the most reliable and commonly used alpha diversity indexes, such as the Shannon's  
315 diversity index, the inverse Simpson's diversity index, and the Chao1 diversity index, indicate that  
316 the nasopharyngeal microbiome is highly stable and robust to perturbations throughout life as well  
317 as between sexes within each of the different age groups in healthy subjects. Alpha diversity could  
318 be expected to be lower in the youngest individuals compared to older individuals in all the  
319 anatomical areas, as the fetus is sterile until the moment of birth, when the newborn begins to be  
320 progressively colonized by microorganisms until its definitive microbiota is established<sup>32</sup>. This is  
321 exactly what happens, for example, with the gut microbiome of infants, whose alpha diversity is

322 consistently found to be lower than in adults<sup>33,34</sup>, probably due to the introduction of new diversity  
323 from food, which increases with the consumption of foods other than breast milk<sup>35</sup>. Detailed  
324 metagenomic studies, which should include samples collected at multiple time points during  
325 childhood and during adulthood, would be needed to determine whether something similar occurs  
326 in the nasopharynx. In the case of the present study, we would not be able to detect such differences  
327 in diversity between the youngest individuals and the rest of age groups, if they exist, for 2 reasons:  
328 (i) because our first age group, which includes the youngest individuals, is very broad and  
329 encompasses individuals up to 20 years old, so any differences from infants could be diluted; (ii)  
330 because as we were not interested specifically in children, but in broader age groups spanning all  
331 stages of life, we excluded children younger than 1 year of age from this study, as their highly  
332 changing microbiota in formation could bias the analyses we were interested in. Interestingly,  
333 although it is known that there are relevant sex-associated differences in diversity in other  
334 anatomical areas such as the gut, and that such differences are probably due to the different levels  
335 of sex hormones between both sexes<sup>36</sup>, we did not observe any significant diversity differences  
336 between females and males, even in the age groups where sex hormones levels should be quite  
337 different. It is also curious that, contrary to what happens in the gut where the alpha diversity of  
338 the microbiota decreases with aging<sup>30</sup>, we did not observe a similar reduction in diversity in the  
339 nasopharynx of older individuals. This difference between both anatomical areas might be  
340 explained by the fact that decreased microbial diversity of the gut in older subjects is associated  
341 with chronological age, number of concomitant diseases, number of medications used, increasing  
342 coliform numbers, and changes in diet<sup>37</sup>, and although chronological age affects both anatomical  
343 areas in a similar way, it seems probable that other of these factors might affect the gut microbiota  
344 in a more intense way compared to the nasopharyngeal microbiota. In summary, we can say that  
345 the diversity of the nasopharyngeal community is very stable throughout life and between sexes.

346 Our analyses of nasopharyngeal taxonomic composition at the phylum level revealed the  
347 existence of sex-associated differences within the age groups including individuals between 21  
348 and 70 years of age, but not in the youngest and oldest people. As previously mentioned for the  
349 alpha diversity results, multiple sex-associated differences in taxonomic composition have also  
350 been described for the human gut microbiome<sup>36</sup>, and numerous studies have found evidence to  
351 support the idea that levels of sex hormones, such as progesterone<sup>38</sup>, androgen<sup>39</sup>, and oestrogen  
352<sup>40</sup>, regulate its composition<sup>41,42</sup>. The effects of sex hormones on other microbial niches, such as

353 the human vaginal microbiota, have also recently been demonstrated <sup>43</sup>. Although it has been  
354 shown that oestrogen stimulation (hormone/gender effect) in the upper respiratory tract mucosa  
355 could reduce virus virulence by improving both nasal clearance and local immune response <sup>44</sup>, the  
356 relationship between sex hormone levels and the nasopharyngeal microbiota has so far not been  
357 directly proven in clinical studies. However, the fact that our results reveal differences between  
358 females and males at the phylum level in all the age groups, except for those where differences in  
359 sex hormones levels do not exist or are not so strong (> 70 years and 1-20 years old), suggests that  
360 sex hormones might be modulating the taxonomic composition of the healthy human nasopharynx.

361 We might be tempted to think that the microbiota of nearby anatomical sites that are closely  
362 related in terms of structure and function should be practically identical. However, the reality  
363 seems to be much more complex. A good example of this is that although nasopharynx and nose  
364 are adjacent, and previous metagenomic studies comparing the microbiome of both anatomical  
365 areas have revealed a clear continuity, there are important differences between the two sites and  
366 even niche-specific bacteria <sup>45</sup>. Thus, while the adult nasal microbiome is overrepresented with  
367 *Moraxella*, *Haemophilus*, *Neisseria*, *Streptococcus*, *Dolosigranulum*, *Gemella*, *Granulicatella*,  
368 *Corynebacterium*, *Propionibacterium*, *Turicella*, and *Simonsiella* <sup>46</sup>, our taxonomic composition  
369 results at the genus level show that several of those bacterial genera, such as *Granulicatella*,  
370 *Turicella* or *Simonsiella*, do not even account for more than 1% of the nasopharyngeal microbiota  
371 in any of the age groups. Furthermore, our analyses of the taxonomic composition at the genus  
372 level only found statistically significant relative abundance differences between the different age  
373 groups for 11 bacterial genera: *Acinetobacter*, *Brevundimonas*, *Dolosigranulum*, *Finegoldia*,  
374 *Haemophilus*, *Leptotrichia*, *Moraxella*, *Peptoniphilus*, *Pseudomonas*, *Rothia*, and *Staphylococcus*.  
375 Interestingly, most of the 37 statistically significant differences found between the different age  
376 groups for these 11 genera appear when comparing age groups A1 and A6 with the rest of the age  
377 groups (18 out of 37 and 16 out of 37, respectively). Therefore, these results reveal that, in terms  
378 of relative abundance of bacterial genera, the nasopharyngeal microbiota of the youngest and  
379 oldest subjects is more different from that of the other age groups than that of any other age group.  
380 Among these age-associated changes, from a clinical perspective it is particularly concerning the  
381 fact that *Dolosigranulum*, which is an opportunistic pathogen that causes pneumonia in elderly  
382 patients <sup>47</sup>, is overrepresented in the nasopharynx of individuals over 70 years of age compared to  
383 middle-aged subjects. This suggests that the relative abundance of *Dolosigranulum* may be higher

384 in elderly people due to the process of immunosenescence that occurs in them<sup>48,49</sup>, or that its  
385 higher abundance may be due to other unidentified age-related factors. In either case, in both  
386 hypothetical cases, the process of immunosenescence would make elderly individuals more  
387 susceptible to an opportunistic lung infection caused by *Dolosigranulum*. In the opposite direction,  
388 it is paradoxical that *Haemophilus*, that causes pneumonia mainly in elderly people<sup>50</sup>, is  
389 underrepresented precisely in individuals over 70 years of age. This suggests that people with high  
390 relative abundance of *Haemophilus* die prematurely, or that their lower relative abundance in  
391 elderly subjects is due to other unidentified age-related factors and that older individuals are much  
392 more susceptible to opportunistic infections caused by this bacterium, probably due to the  
393 previously mentioned process of immunosenescence. Something similar could be said for *Rothia*,  
394 as its relative abundance also decreases drastically in people over 70 years of age while it is known  
395 to cause pneumonia mostly in aged individuals<sup>51</sup>. It is worth noting that, regardless of their relative  
396 abundance or whether they show statistically significant differences between age or sex groups,  
397 those bacterial genera that are present in most individuals or whose frequency of appearance  
398 changes drastically throughout life could be relevant from a biomedical and ecological point of  
399 view. Based on this idea, we highlight *Anaerococcus*, *Burkholderia*, *Campylobacter*, *Delftia*,  
400 *Prevotella*, *Neisseria*, *Propionibacterium*, *Streptococcus*, *Ralstonia*, *Sphingomonas* and  
401 *Corynebacterium* as candidate bacterial genera that could be playing an important role as they are  
402 present in the nasopharynx of most healthy individuals. In addition, we propose *Faecalibacterium*,  
403 *Stenotrophomonas* and *Phascolarctobacterium* as candidate bacterial genera that could be playing  
404 a relevant role, as their frequency of appearance in the nasopharynx of healthy subjects increases  
405 progressively throughout life, and *Aggregatibacter*, *Gemella* and *Fusobacterium* because their  
406 frequency of appearance in the nasopharynx decreases drastically and progressively as healthy  
407 people age. Elucidating the biomedical relevance of all these bacterial genera which are part of the  
408 healthy nasopharyngeal microbiota and determining their potential involvement in health and  
409 disease at different stages of life, is certainly an exciting topic for future work.

410 Although multiple studies have analyzed the microorganisms present in the nasopharynx  
411 in different contexts before this work, the composition of the healthy and mature human  
412 nasopharyngeal microbiota was largely unknown since i) most studies focused on children or  
413 elderly people, ii) confounding factors such as external drivers that alter it are not well known to  
414 date, and iii) a focus is generally done on its variation in diseases. With this work, we fill this



415 important gap in knowledge. However, further research will be necessary to elucidate how the  
416 nasopharyngeal taxonomic composition as well as the age- and sex-associated changes described  
417 here, affect the susceptibility of certain individuals to infectious diseases. Studying the case of the  
418 elderly people in detail will be particularly interesting from a biomedical and clinical perspective,  
419 since their nasopharyngeal microbiota is significantly different from that of younger subjects, and  
420 they are known to be much more susceptible to multiple infectious diseases, most notably COVID-  
421 19<sup>52</sup>. Therefore, it would not be too bold to hypothesize that there may be some correlation  
422 between the taxonomic composition in the nasopharynx of the elderly and their increased  
423 susceptibility to COVID-19, but this will be a challenge for future metagenomic studies that should  
424 include different age groups, both sexes, and patients infected with SARS-CoV-2 who have  
425 developed the disease with different severity.

426

## 427 **METHODS**

### 428 **Sample selection, collection, and classification**

429 We randomly selected 120 nasopharyngeal samples from a cohort of 6,354 healthy subjects  
430 belonging to the Health Area I of the Region of Murcia (Spain) and who voluntarily gave their  
431 samples for diagnostic purposes. Nasopharyngeal swabs were obtained by approaching the  
432 nasopharynx transnasally between August 27, 2020, and September 8, 2020, and the Microbiology  
433 Service of the Hospital Clínico Universitario Virgen de la Arrixaca (Murcia, Spain) used  
434 polymerase chain reaction (PCR) to verify that all the samples were negative for SARS-CoV-2  
435 infection. The kit used for the PCR test was Novel Coronavirus (2019-nCoV) Real Time Multiplex  
436 RT-PCR kit (Detection for 3 Genes), manufactured by Shanghai ZJ Bio-Tech Co., Ltd. (Liferiver)  
437 and the CFX96 Touch Real-Time PCR Detection System (BioRad).

438 To facilitate the study of age-associated changes in the nasopharyngeal microbiota  
439 throughout life, the samples were binned into six age groups (Table S1). In addition, within each  
440 age group, half of the samples were from males and the other half from females in order to study  
441 the possible sex-associated changes in the nasopharyngeal microbiota at different life stages (Table  
442 S1).

443



#### 444 **Amplification, library preparation, and sequencing**

445 Bacterial identification was performed by sequencing the 16S rRNA gene's hypervariable  
446 regions. The 16S rRNA gene was amplified by multiplex PCR using Ion Torrent 16S  
447 Metagenomics kit (Ion Torrent, Thermo Fisher Scientific Inc.), using two sets of primers, which  
448 targets regions V2, V4, and V8, and V3, V6-7, and V9, respectively. Amplification was carried  
449 out in a SimpliAmp thermal cycler (Applied Biosystems) running the following program:  
450 denaturation at 95°C for 10 min, followed by a 3-step cyclic stage consisting of 25 cycles of  
451 denaturation at 95°C for 30 s, annealing at 58°C for 30 s, and extension at 72°C for 20 s; at the  
452 end of this stage, the program concludes with an additional extension period at 72°C for 7 min and  
453 the reaction is stopped by cooling at 4°C. The resulting amplicons were tested by electrophoresis  
454 through 2% agarose gels in tris-acetate-EDTA (TAE) buffer, purified with AMPure® XP Beads  
455 (Beckman Coulter, Inc, Atlanta, GA, USA), and quantified using Qubit™ dsDNA HS Assay Kit  
456 in a Qubit 3 fluorometer (Invitrogen, Thermo Fisher).

457 A library was generated from each sample using the Ion Plus Fragment Library Kit (Ion  
458 Torrent), whereby each library is indexed by ligating Ion Xpress™ Barcode Adapters (Ion  
459 Torrent) to the amplicons. Libraries were purified with AMPure® XP Beads and quantified using  
460 the Ion Universal Library Quantitation Kit (Ion Torrent) in a QuantStudio 5 Real-Time PCR  
461 Instrument (Applied Biosystems). The libraries were then pooled and clonally amplified onto Ion  
462 Sphere Particles (ISPs) by emulsion PCR in an Ion OneTouch™ 2 System (Ion Torrent) according  
463 to the manufacturer's instructions. Sequencing of the amplicon libraries was carried on an Ion  
464 530™ Kit (Ion Torrent) on an Ion S5™ System (Ion Torrent). After sequencing, the individual  
465 sequence reads were filtered by the Torrent Suite™ Software v5.12.1 to remove low quality and  
466 polyclonal sequences.

467

#### 468 **Bioinformatics and statistical analysis**

469 The obtained sequences were analyzed and annotated with the Ion Reporter 5.18.2.0  
470 software using the 16S rRNA Profiling workflow 5.18. Clustering into OTUs and taxonomic  
471 assignment were performed based on the Basic Local Alignment Search Tool (BLAST) using two  
472 reference libraries, MicroSEQ® 16S Reference Library v2013.1 and the Greengenes v13.5

473 database. For an OTU to be accepted as valid, at least ten reads with an alignment coverage  $\geq 90\%$   
474 between hit and query were required. Identifications were accepted at the genus and species level  
475 with sequence identity  $> 97\%$  and  $> 99\%$ , respectively. Annotated OTUs were then exported for  
476 analysis with R (v.4.1.2) (<https://www.R-project.org/>), where data were converted to phyloseq  
477 object<sup>53</sup> and abundance bar plots were generated. Data were converted to DESeq2 object<sup>54</sup>, that  
478 uses a generalized linear model based on a negative binomial distribution, to calculate differential  
479 abundance between groups. Principal component analysis (PCA) was performed using the  
480 abundance data of the different taxa for each individual. Alpha diversity was estimated based on  
481 Chao1, Shannon and Inverse-Simpson indices by using the phyloseq package. To test for  
482 statistically significant differences between pairwise groups in alpha diversity, the non-parametric  
483 Wilcoxon test was used. Frequency of appearance was obtained by calculating the percentage of  
484 individuals in each age group in which that taxon occurs. The bar plots aggregated by groups (age  
485 and/or gender) show the aggregated relative abundance (sum of relative abundances). Krona  
486 charts, that aid in the estimation of relative abundances even within complex metagenomic  
487 classifications, were generated as previously described<sup>55</sup>. All the other graphs were generated with  
488 the R package ggplot2 version 3.3.3.<sup>56</sup>

489

## 490 **Acknowledgements**

491 We thank I. Fuentes, P. Martinez for their excellent technical assistance, Dr. Anabel Antón for 16S  
492 rRNA sequencing, and the staff of the Microbiology Service of HCUVA for sample collection and  
493 processing.

## 494 **Authors' contributions**

495 The authors offer the following declarations about their contributions: Conceived and designed the  
496 experiments: SC, MLC, VM. Performed the experiments: SC, FP-S. Analyzed the data: SC, FP-S,  
497 SDT, AE, MLC, VM. Provided essential samples: AM-C. Wrote the paper: SC, VM.

## 498 **Funding**

499 This work was supported by the grant 00006/COVI/20 to VM and MLC funded by Fundación  
500 Séneca-Murcia, the Saavedra Fajardo contract to SC funded by Fundación Séneca-Murcia, the

501 Juan de la Cierva-Incorporación contract to SDT funded by Ministerio de Ciencia y  
502 Tecnología/AEI/FEDER. The funders had no role in the study design, data collection and analysis,  
503 decision to publish, or preparation of the manuscript.

#### 504 **Availability of data and materials**

505 Raw sequencing data of all 16S rRNA sequences, metadata, and abundance tables are available at  
506 the open access repository Figshare under the accession numbers 10.6084/m9.figshare.19785991,  
507 10.6084/m9.figshare.19786147, and 10.6084/m9.figshare.19785991, respectively.

#### 508 **Ethics approval and consent to participate**

509 All procedures in this work were carried out following the principles expressed in the Declaration  
510 of Helsinki, as well as in all the other applicable international, national, and/or institutional  
511 guidelines for the use of samples and data, and have been approved by the Comité de Ética de la  
512 Investigación (CEIm) at Hospital Clínico Universitario Virgen de la Arrixaca (protocol number  
513 2020-10-12-HCUVA – Effects of aging in the susceptibility to SARS-CoV-2). Nasopharyngeal  
514 swabs were collected for diagnosis of SARS-CoV-2 infection before this study was conceived,  
515 without the need of any informed consent as the collection procedure was non-invasive and risk-  
516 free. However, when the COVID-19 pandemic spread out of control, samples started to be kept at  
517 the Microbiology Service instead of destroyed after diagnosis as it was considered that they might  
518 be extremely relevant for research. This, together with the facts that i) the retrospective use of  
519 these samples did not affect donor health or treatment at all, ii) all data has been treated  
520 anonymously, and iii) movement was limited due to the exceptional circumstances of the pandemic  
521 meant that it was not possible to obtain informed consents for the use of these samples in research.  
522 Moreover, none of the subjects expressly objected to their samples being used for research.

#### 523 **Competing interests**

524 The authors declare no competing interests.

525

## 526 References

- 527 1 Heintz, C. & Mair, W. You are what you host: microbiome modulation of the aging  
528 process. *Cell* **156**, 408-411, doi:10.1016/j.cell.2014.01.025 (2014).
- 529 2 Kim, M. & Benayoun, B. A. The microbiome: an emerging key player in aging and  
530 longevity. *Transl Med Aging* **4**, 103-116 (2020).
- 531 3 Mossad, O. *et al.* Gut microbiota drives age-related oxidative stress and mitochondrial  
532 damage in microglia via the metabolite N. *Nat Neurosci* **25**, 295-305, doi:10.1038/s41593-  
533 022-01027-3 (2022).
- 534 4 Warman, D. J., Jia, H. & Kato, H. The Potential Roles of Probiotics, Resistant Starch, and  
535 Resistant Proteins in Ameliorating Inflammation during Aging (Inflammaging). *Nutrients*  
536 **14**, doi:10.3390/nu14040747 (2022).
- 537 5 Gates, E. J., Bernath, A. K. & Klegeris, A. Modifying the diet and gut microbiota to prevent  
538 and manage neurodegenerative diseases. *Rev Neurosci*, doi:10.1515/revneuro-2021-0146  
539 (2022).
- 540 6 Murray, E. R., Kemp, M. & Nguyen, T. T. The Microbiota-Gut-Brain Axis in Alzheimer's  
541 Disease: A Review of Taxonomic Alterations and Potential Avenues for Interventions.  
542 *Arch Clin Neuropsychol*, doi:10.1093/arclin/acac008 (2022).
- 543 7 Das, S., Bhattacharjee, M. J., Mukherjee, A. K. & Khan, M. R. Recent advances in  
544 understanding of multifaceted changes in the vaginal microenvironment: implications in  
545 vaginal health and therapeutics. *Crit Rev Microbiol*, 1-27,  
546 doi:10.1080/1040841X.2022.2049696 (2022).
- 547 8 Aleti, G. *et al.* Salivary bacterial signatures in depression-obesity comorbidity are  
548 associated with neurotransmitters and neuroactive dipeptides. *BMC Microbiol* **22**, 75,  
549 doi:10.1186/s12866-022-02483-4 (2022).
- 550 9 Song, H., Xiao, K., Min, H., Chen, Z. & Long, Q. Characterization of Conjunctival Sac  
551 Microbiome from Patients with Allergic Conjunctivitis. *J Clin Med* **11**,  
552 doi:10.3390/jcm11041130 (2022).
- 553 10 Saud Hussein, A., Ibraheem Salih, N. & Hashim Saadoon, I. Effect of Microbiota in the  
554 Development of Breast Cancer. *Arch Razi Inst* **76**, 761-768,  
555 doi:10.22092/ari.2021.355961.1750 (2021).
- 556 11 Costantini, C. *et al.* A High-Risk Profile for Invasive Fungal Infections Is Associated with  
557 Altered Nasal Microbiota and Niche Determinants. *Infect Immun*, e0004822,  
558 doi:10.1128/iai.00048-22 (2022).
- 559 12 Dickson, R. P., Erb-Downward, J. R., Martinez, F. J. & Huffnagle, G. B. The Microbiome  
560 and the Respiratory Tract. *Annu Rev Physiol* **78**, 481-504, doi:10.1146/annurev-physiol-  
561 021115-105238 (2016).
- 562 13 Dubourg, G., Edouard, S. & Raoult, D. Relationship between nasopharyngeal microbiota  
563 and patient's susceptibility to viral infection. *Expert Rev Anti Infect Ther* **17**, 437-447,  
564 doi:10.1080/14787210.2019.1621168 (2019).
- 565 14 Sahin-Yilmaz, A. & Naclerio, R. M. Anatomy and physiology of the upper airway. *Proc*  
566 *Am Thorac Soc* **8**, 31-39, doi:10.1513/pats.201007-050RN (2011).
- 567 15 Bluestone, C. D. & Doyle, W. J. Anatomy and physiology of eustachian tube and middle  
568 ear related to otitis media. *J Allergy Clin Immunol* **81**, 997-1003, doi:10.1016/0091-  
569 6749(88)90168-6 (1988).

- 570 16 Zhou, P. *et al.* A pneumonia outbreak associated with a new coronavirus of probable bat  
571 origin. *Nature* **579**, 270-273, doi:10.1038/s41586-020-2012-7 (2020).
- 572 17 Wang, H. *et al.* Nasopharyngeal Swabs Are More Sensitive Than Oropharyngeal Swabs  
573 for COVID-19 Diagnosis and Monitoring the SARS-CoV-2 Load. *Front Med (Lausanne)*  
574 **7**, 334, doi:10.3389/fmed.2020.00334 (2020).
- 575 18 Zhou, Y. & O'Leary, T. J. Relative sensitivity of anterior nares and nasopharyngeal swabs  
576 for initial detection of SARS-CoV-2 in ambulatory patients: Rapid review and meta-  
577 analysis. *PLoS One* **16**, e0254559, doi:10.1371/journal.pone.0254559 (2021).
- 578 19 Hitzenbichler, F., Bauernfeind, S., Salzberger, B., Schmidt, B. & Wenzel, J. J. Comparison  
579 of Throat Washings, Nasopharyngeal Swabs and Oropharyngeal Swabs for Detection of  
580 SARS-CoV-2. *Viruses* **13**, doi:10.3390/v13040653 (2021).
- 581 20 Hurst, J. H. *et al.* Age-related changes in the nasopharyngeal microbiome are associated  
582 with SARS-CoV-2 infection and symptoms among children, adolescents, and young  
583 adults. *Clin Infect Dis*, doi:10.1093/cid/ciac184 (2022).
- 584 21 Ventero, M. P. *et al.* Nasopharyngeal Microbiota as an early severity biomarker in COVID-  
585 19 hospitalised patients. *J Infect* **84**, 329-336, doi:10.1016/j.jinf.2021.12.030 (2022).
- 586 22 Mueller, A. L., McNamara, M. S. & Sinclair, D. A. Why does COVID-19  
587 disproportionately affect older people? *Aging (Albany NY)* **12**, 9959-9981,  
588 doi:10.18632/aging.103344 (2020).
- 589 23 De Maio, F. *et al.* Nasopharyngeal Microbiota Profiling of SARS-CoV-2 Infected Patients.  
590 *Biol Proced Online* **22**, 18, doi:10.1186/s12575-020-00131-7 (2020).
- 591 24 Braun, T. *et al.* SARS-CoV-2 does not have a strong effect on the nasopharyngeal  
592 microbial composition. *Sci Rep* **11**, 8922, doi:10.1038/s41598-021-88536-6 (2021).
- 593 25 Jašarević, E., Morrison, K. E. & Bale, T. L. Sex differences in the gut microbiome-brain  
594 axis across the lifespan. *Philos Trans R Soc Lond B Biol Sci* **371**, 20150122,  
595 doi:10.1098/rstb.2015.0122 (2016).
- 596 26 Ji, H. *et al.* Sex Differences in Blood Pressure Trajectories Over the Life Course. *JAMA*  
597 *Cardiol* **5**, 19-26, doi:10.1001/jamacardio.2019.5306 (2020).
- 598 27 Scheinost, D. *et al.* Sex differences in normal age trajectories of functional brain networks.  
599 *Hum Brain Mapp* **36**, 1524-1535, doi:10.1002/hbm.22720 (2015).
- 600 28 Markle, J. G. *et al.* Sex differences in the gut microbiome drive hormone-dependent  
601 regulation of autoimmunity. *Science* **339**, 1084-1088, doi:10.1126/science.1233521  
602 (2013).
- 603 29 Bolnick, D. I. *et al.* Individual diet has sex-dependent effects on vertebrate gut microbiota.  
604 *Nat Commun* **5**, 4500, doi:10.1038/ncomms5500 (2014).
- 605 30 Franceschi, C., Garagnani, P., Parini, P., Giuliani, C. & Santoro, A. Inflammaging: a new  
606 immune-metabolic viewpoint for age-related diseases. *Nat Rev Endocrinol* **14**, 576-590,  
607 doi:10.1038/s41574-018-0059-4 (2018).
- 608 31 Lemon, K. P., Armitage, G. C., Relman, D. A. & Fischbach, M. A. Microbiota-targeted  
609 therapies: an ecological perspective. *Sci Transl Med* **4**, 137rv135,  
610 doi:10.1126/scitranslmed.3004183 (2012).
- 611 32 Shao, Y. *et al.* Stunted microbiota and opportunistic pathogen colonization in caesarean-  
612 section birth. *Nature* **574**, 117-121, doi:10.1038/s41586-019-1560-1 (2019).
- 613 33 Yatsunenko, T. *et al.* Human gut microbiome viewed across age and geography. *Nature*  
614 **486**, 222-227, doi:10.1038/nature11053 (2012).



- 615 34 Koenig, J. E. *et al.* Succession of microbial consortia in the developing infant gut  
616 microbiome. *Proc Natl Acad Sci U S A* **108 Suppl 1**, 4578-4585,  
617 doi:10.1073/pnas.1000081107 (2011).
- 618 35 Bokulich, N. A. *et al.* Antibiotics, birth mode, and diet shape microbiome maturation  
619 during early life. *Sci Transl Med* **8**, 343ra382, doi:10.1126/scitranslmed.aad7121 (2016).
- 620 36 Consortium, H. M. P. Structure, function and diversity of the healthy human microbiome.  
621 *Nature* **486**, 207-214, doi:10.1038/nature11234 (2012).
- 622 37 Leite, G. *et al.* Age and the aging process significantly alter the small bowel microbiome.  
623 *Cell Rep* **36**, 109765, doi:10.1016/j.celrep.2021.109765 (2021).
- 624 38 Kornman, K. S. & Loesche, W. J. Effects of estradiol and progesterone on *Bacteroides*  
625 *melaninogenicus* and *Bacteroides gingivalis*. *Infect Immun* **35**, 256-263,  
626 doi:10.1128/iai.35.1.256-263.1982 (1982).
- 627 39 Org, E. *et al.* Sex differences and hormonal effects on gut microbiota composition in mice.  
628 *Gut Microbes* **7**, 313-322, doi:10.1080/19490976.2016.1203502 (2016).
- 629 40 Koren, O. *et al.* Host remodeling of the gut microbiome and metabolic changes during  
630 pregnancy. *Cell* **150**, 470-480, doi:10.1016/j.cell.2012.07.008 (2012).
- 631 41 Neuman, H., Debelius, J. W., Knight, R. & Koren, O. Microbial endocrinology: the  
632 interplay between the microbiota and the endocrine system. *FEMS Microbiol Rev* **39**, 509-  
633 521, doi:10.1093/femsre/fuu010 (2015).
- 634 42 He, S. *et al.* The Gut Microbiome and Sex Hormone-Related Diseases. *Front Microbiol*  
635 **12**, 711137, doi:10.3389/fmicb.2021.711137 (2021).
- 636 43 Wessels, J. M., Felker, A. M., Dupont, H. A. & Kaushic, C. The relationship between sex  
637 hormones, the vaginal microbiome and immunity in HIV-1 susceptibility in women. *Dis*  
638 *Model Mech* **11**, doi:10.1242/dmm.035147 (2018).
- 639 44 Di Stadio, A., Della Volpe, A., Ralli, M. & Ricci, G. Gender differences in COVID-19  
640 infection. The estrogen effect on upper and lower airways. Can it help to figure out a  
641 treatment? *Eur Rev Med Pharmacol Sci* **24**, 5195-5196,  
642 doi:10.26355/eurev\_202005\_21298 (2020).
- 643 45 De Boeck, I. *et al.* Comparing the Healthy Nose and Nasopharynx Microbiota Reveals  
644 Continuity As Well As Niche-Specificity. *Front Microbiol* **8**, 2372,  
645 doi:10.3389/fmicb.2017.02372 (2017).
- 646 46 Hofstra, J. J. *et al.* Changes in microbiota during experimental human Rhinovirus infection.  
647 *BMC Infect Dis* **15**, 336, doi:10.1186/s12879-015-1081-y (2015).
- 648 47 Lécuyer, H. *et al.* *Dolosigranulum pigrum* causing nosocomial pneumonia and septicemia.  
649 *J Clin Microbiol* **45**, 3474-3475, doi:10.1128/JCM.01373-07 (2007).
- 650 48 Gruver, A. L., Hudson, L. L. & Sempowski, G. D. Immunosenescence of ageing. *J Pathol*  
651 **211**, 144-156, doi:10.1002/path.2104 (2007).
- 652 49 Fulop, T. *et al.* Immunosenescence and Inflamm-Aging As Two Sides of the Same Coin:  
653 Friends or Foes? *Front Immunol* **8**, 1960, doi:10.3389/fimmu.2017.01960 (2017).
- 654 50 Blain, A. *et al.* Invasive *Haemophilus influenzae* Disease in Adults  $\geq 65$  Years, United  
655 States, 2011. *Open Forum Infect Dis* **1**, ofu044, doi:10.1093/ofid/ofu044 (2014).
- 656 51 Maraki, S. & Papadakis, I. S. *Rothia mucilaginosa* pneumonia: a literature review. *Infect*  
657 *Dis (Lond)* **47**, 125-129, doi:10.3109/00365548.2014.980843 (2015).
- 658 52 Chen, Y. *et al.* Aging in COVID-19: Vulnerability, immunity and intervention. *Ageing Res*  
659 *Rev* **65**, 101205, doi:10.1016/j.arr.2020.101205 (2021).

660 53 McMurdie, P. J. & Holmes, S. phyloseq: an R package for reproducible interactive analysis  
661 and graphics of microbiome census data. *PLoS One* **8**, e61217,  
662 doi:10.1371/journal.pone.0061217 (2013).  
663 54 Love, M. I., Huber, W. & Anders, S. Moderated estimation of fold change and dispersion  
664 for RNA-seq data with DESeq2. *Genome Biol* **15**, 550, doi:10.1186/s13059-014-0550-8  
665 (2014).  
666 55 Ondov, B. D., Bergman, N. H. & Phillippy, A. M. Interactive metagenomic visualization  
667 in a Web browser. *BMC Bioinformatics* **12**, 385, doi:10.1186/1471-2105-12-385 (2011).  
668 56 Wickham, H. *ggplot2: Elegant Graphics for Data Analysis*. (Springer-Verlag, 2016).  
669  
670



671 **Figure legends**

672 **Figure 1. Sample overview using PCA.** Using the relative abundance of 250 genera in the 119  
673 samples as input, the data were linearly transformed and visualized in two-dimensional space.  
674 Each sample is represented by one dot, colored according to age, and shaped according to sex. The  
675 percentage of the variance of the original data explained by each of the two principal components  
676 is indicated in the axis labels.

677

678 **Figure 2. Comparison of alpha diversity parameters across the age and sex groups studied.**  
679 Box-whisker plots of the alpha diversity Shannon index and its comparison using the Kruskal-  
680 Wallis test among the different age groups established for this study (**a**), and the Wilcoxon signed-  
681 rank test between females and males (**b-c**). Each sample is represented by one dot.

682

683 **Figure 3. Taxonomic composition and age-associated metagenomic changes in the**  
684 **nasopharynx of healthy individuals. a-f** Krona charts showing the bacterial community  
685 composition at the phylum level in the indicated age groups. Stacked bar charts showing the  
686 relative abundance (%) of bacterial phyla. **g** Stacked bar charts showing the relative abundance  
687 (%) of bacterial families in the indicated age groups. **h** Stacked bar charts showing the relative  
688 abundance (%) of bacterial genera in the indicated age groups. For clarity, only bacterial families  
689 (**g**) and genera (**h**) with average abundance > 1% at each age group are shown.

690

691 **Figure 4. Taxonomic composition and frequency of appearance of the 11 bacterial genera**  
692 **which show significant differences between age groups. a** Stacked bar charts showing the  
693 relative abundance (%) of the 11 bacterial genera indicated in the age groups established for this  
694 study. **b** Percentage of individuals, of the total included in this study, in which the indicated genera  
695 are present in the indicated age groups.

696

697 **Figure 5. Frequency of appearance of potential biologically relevant bacterial genera. a-c**  
698 Percentage of individuals, of the total included in this study, in which the indicated genera are  
699 present in the indicated age groups.

700

#### 701 **Supplementary figure legends**

702 **Figure S1. Comparison of alpha diversity parameters across the age and sex groups studied.**

703 Box-whisker plots of the alpha diversity inverse Simpson index and its comparison using the  
704 Kruskal-Wallis test among the different age groups established for this study (a), and the Wilcoxon  
705 signed-rank test between females and males (b-c). Each sample is represented by one dot.

706

707 **Figure S2. Comparison of alpha diversity parameters across the age and sex groups studied.**

708 Box-whisker plots of the alpha diversity Chao1 index and its comparison using the Kruskal-Wallis  
709 test among the different age groups established for this study (a), and the Wilcoxon signed-rank  
710 test between females and males (b-c). Each sample is represented by one dot.

711

712 **Figure S3. Taxonomic composition and age- and sex-associated metagenomic changes in the**

713 **nasopharynx of healthy people. a-f** Krona charts showing bacterial community composition at  
714 phylum level in the indicated age and sex groups.

715

716 **Figure S4. Taxonomic composition and age- and sex-associated metagenomic changes at the**

717 **family level in the nasopharynx of healthy people.** Stacked bar charts showing the relative  
718 abundance (%) of bacterial families in the indicated age groups and separately by sex. For clarity,  
719 only the bacterial families with average abundance > 1% at each age group are shown.

720

721 **Figure S5. Taxonomic composition and age- and sex-associated metagenomic changes at the**

722 **family level in the nasopharynx of each individual included in this study.** Stacked bar charts  
723 showing the relative abundance (%) of bacterial families, in the indicated age groups and

724 separately by sex, of each subject included in this study. For clarity, only the bacterial families  
725 with average abundance > 1% at each age group are shown.

726

727 **Figure S6. Taxonomic composition and age- and sex-associated metagenomic changes at the**  
728 **genus level in the nasopharynx of healthy people.** Stacked bar charts showing the relative  
729 abundance (%) of bacterial genera in the indicated age groups and separately by sex. For clarity,  
730 only the bacterial genera with average abundance > 1% at each age group are shown.

731

732 **Figure S7. Taxonomic composition and age- and sex-associated metagenomic changes at the**  
733 **genus level in the nasopharynx of each individual included in this study.** Stacked bar charts  
734 showing the relative abundance (%) of bacterial genera, in the indicated age groups and separately  
735 by sex, of each subject included in this study. For clarity, only the bacterial genera with average  
736 abundance > 1% at each age group are shown.

737

738 **Figure S8. Taxonomic composition and age- and sex-associated metagenomic changes at the**  
739 **genus level in the nasopharynx of healthy people.** Stacked bar charts showing the relative  
740 abundance (%) of the 11 selected bacterial genera indicated, in the indicated age groups and  
741 separately by sex.

742

743 **Figure S9. Taxonomic composition and age- and sex-associated metagenomic changes at the**  
744 **genus level in the nasopharynx of each individual included in this study.** Stacked bar charts  
745 showing the relative abundance (%) of the 11 selected bacterial genera indicated, in the indicated  
746 age groups and separately by sex, of each subject included in this study. Note that the rest of  
747 bacterial genera are not taken into consideration in this analysis.

748

749 **Figure S10. Relative abundance of the 11 bacterial genera which present significant**  
750 **differences between age groups in each individual.** Relative abundance of the selected 11

751 bacterial genera indicated in each subject included in this study, in the indicated age groups. Each  
752 sample is represented by one dot, colored according to age.

753

# Figure 1

medRxiv preprint doi: <https://doi.org/10.1101/2022.06.26.22276913>; this version posted June 27, 2022. The copyright holder for this preprint (which was not certified by peer review) is the author/funder, who has granted medRxiv a license to display the preprint in perpetuity. It is made available under a [CC-BY-NC-ND 4.0 International license](https://creativecommons.org/licenses/by-nc-nd/4.0/).

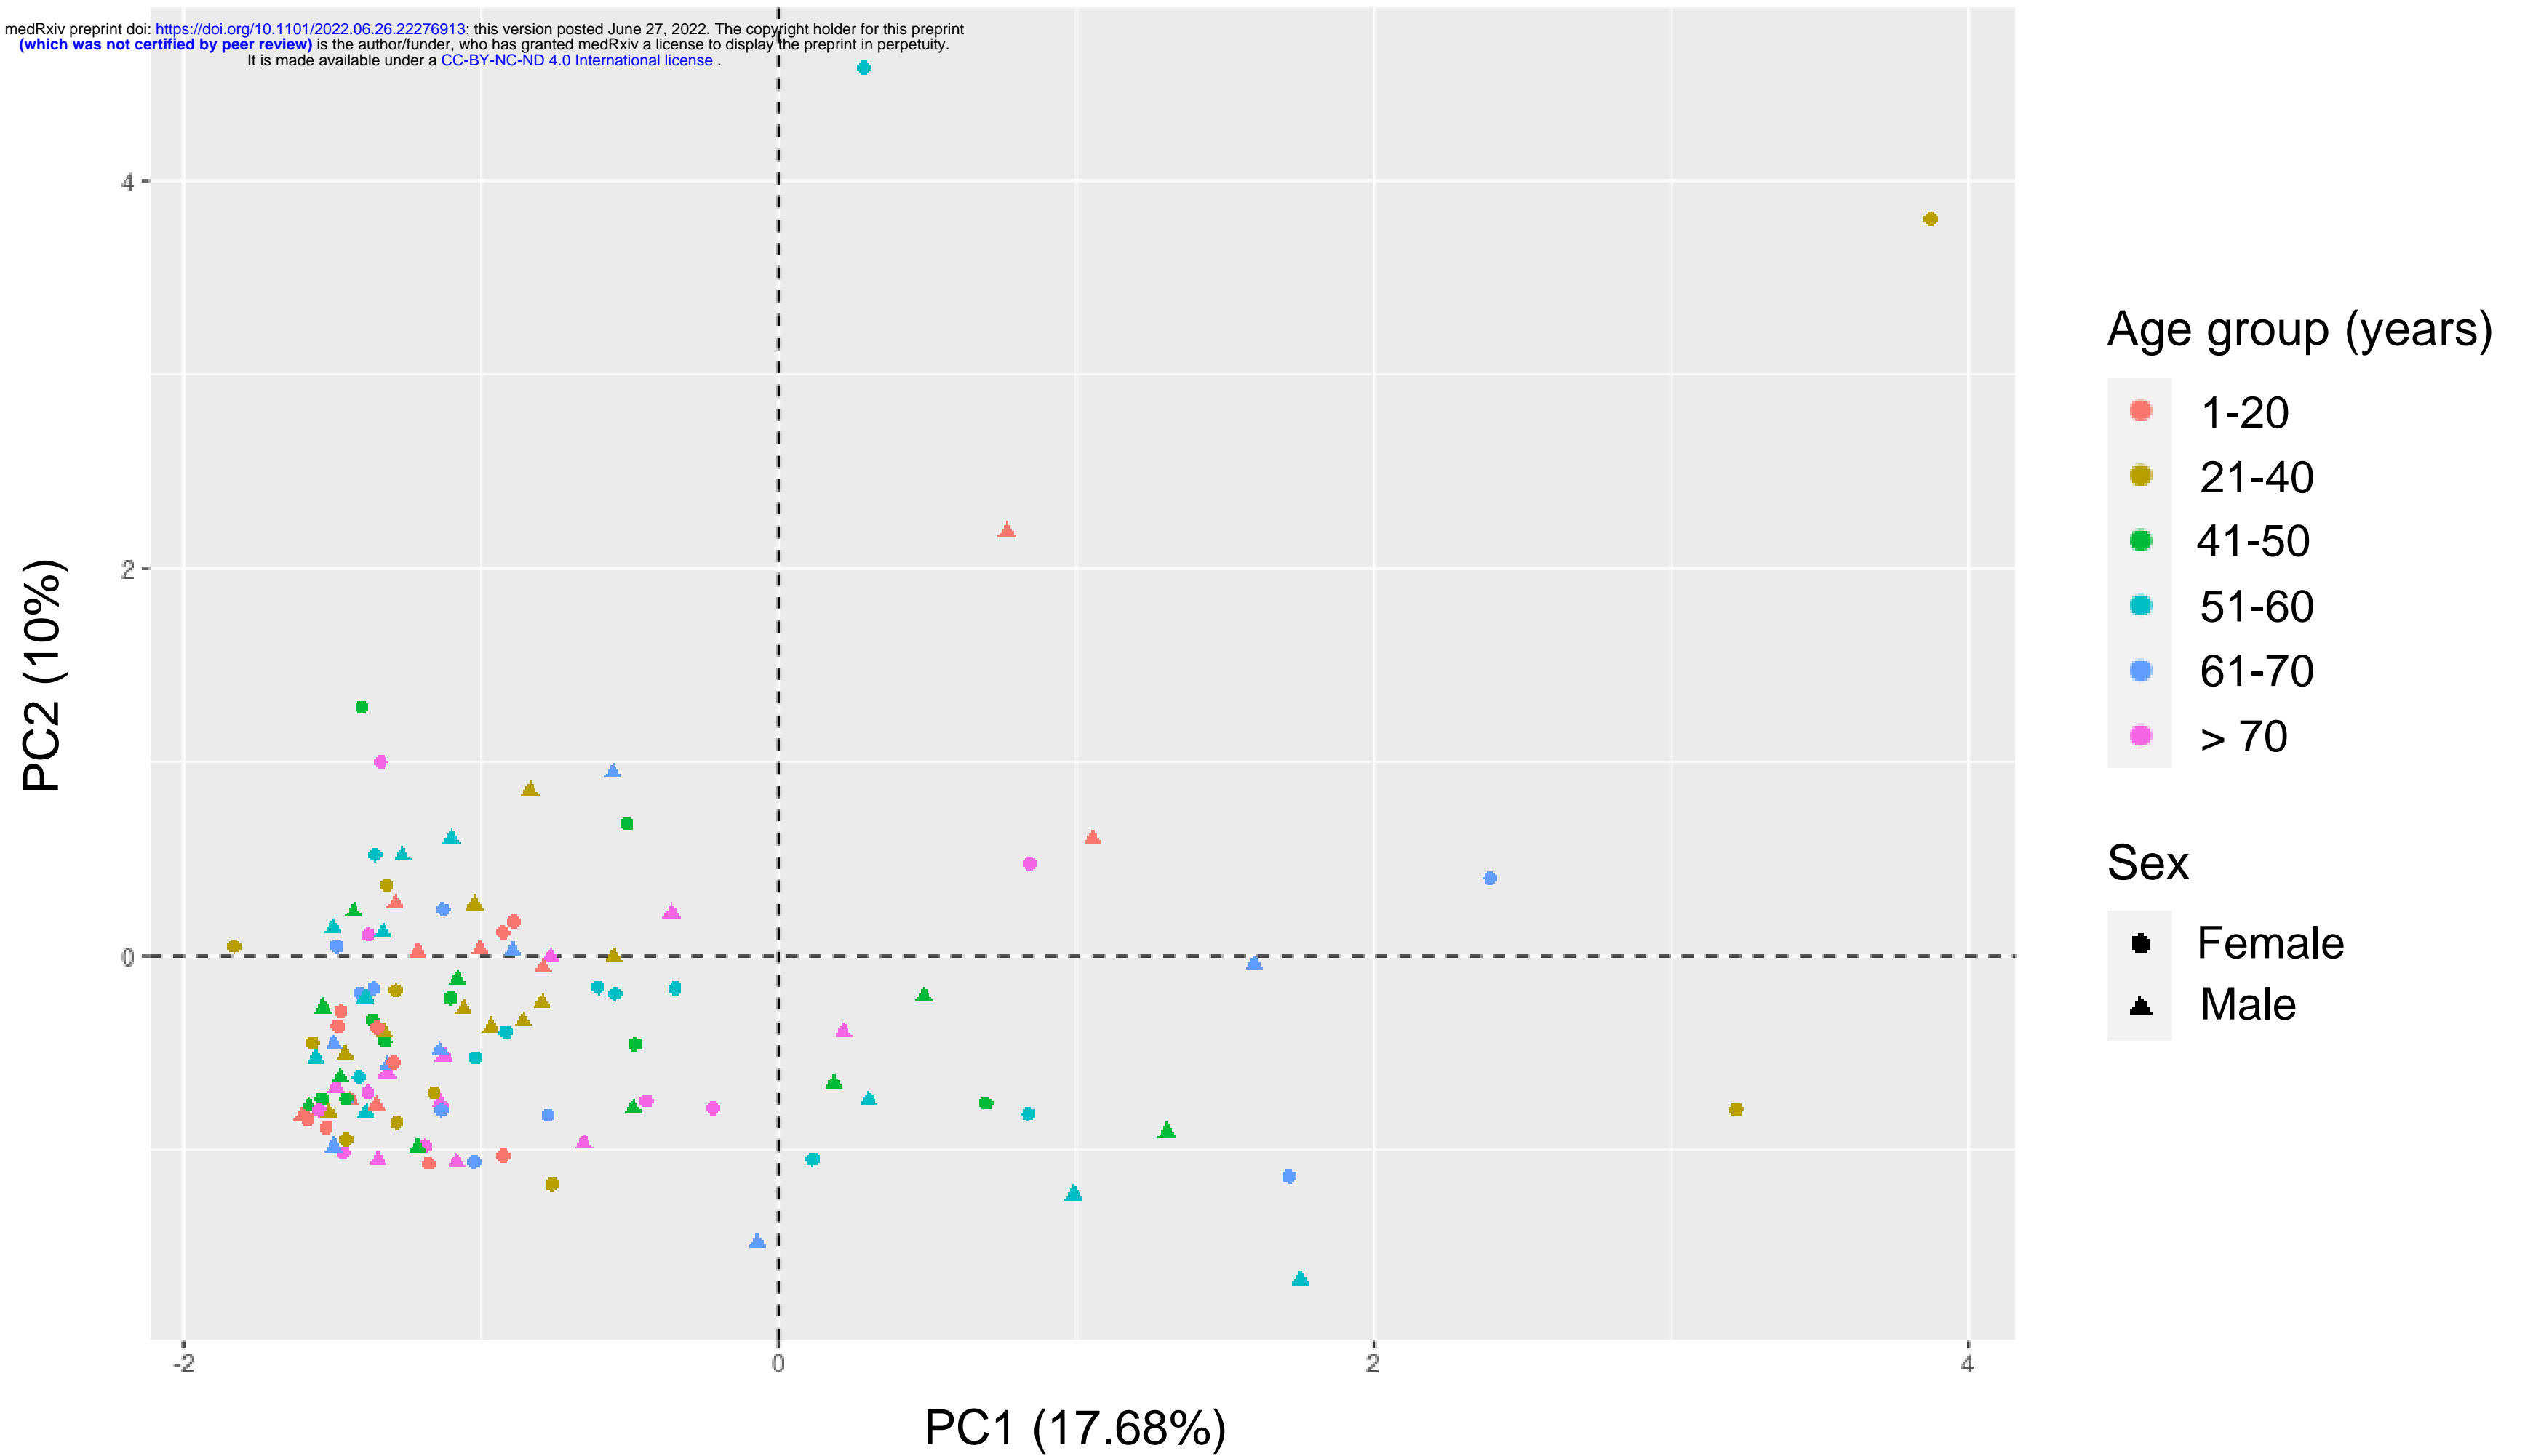

# Figure 2

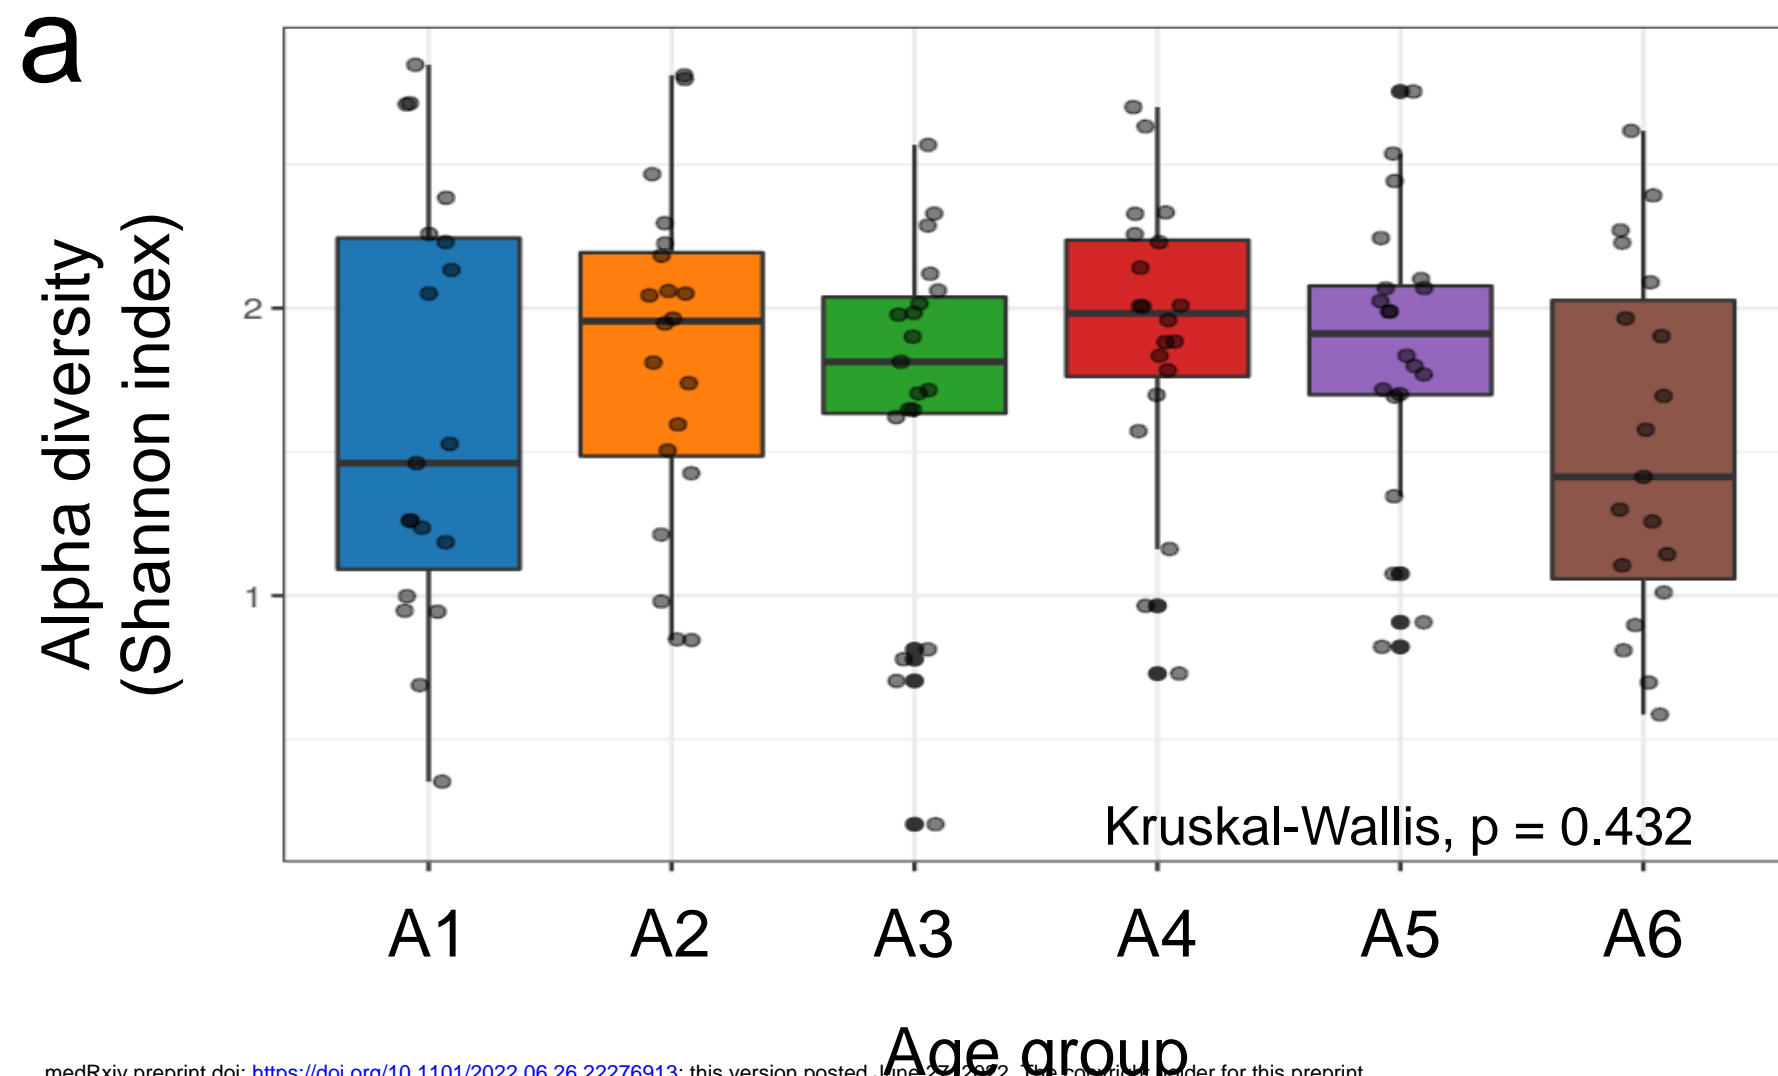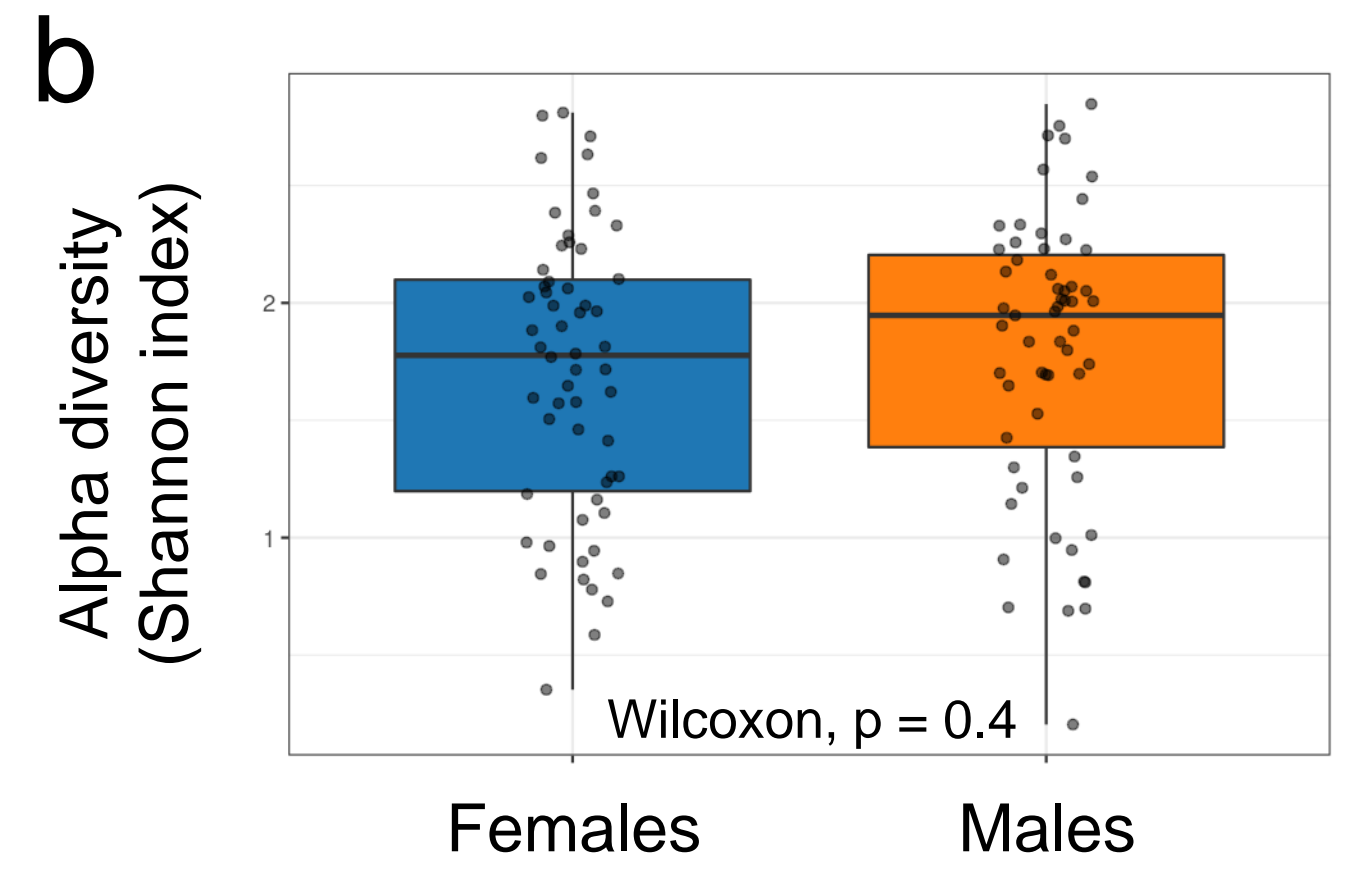

medRxiv preprint doi: <https://doi.org/10.1101/2022.06.26.22276913>; this version posted June 29, 2022. The copyright holder for this preprint (which was not certified by peer review) is the author/funder, who has granted medRxiv a license to display the preprint in perpetuity. It is made available under a [CC-BY-NC-ND 4.0 International license](https://creativecommons.org/licenses/by-nc-nd/4.0/).

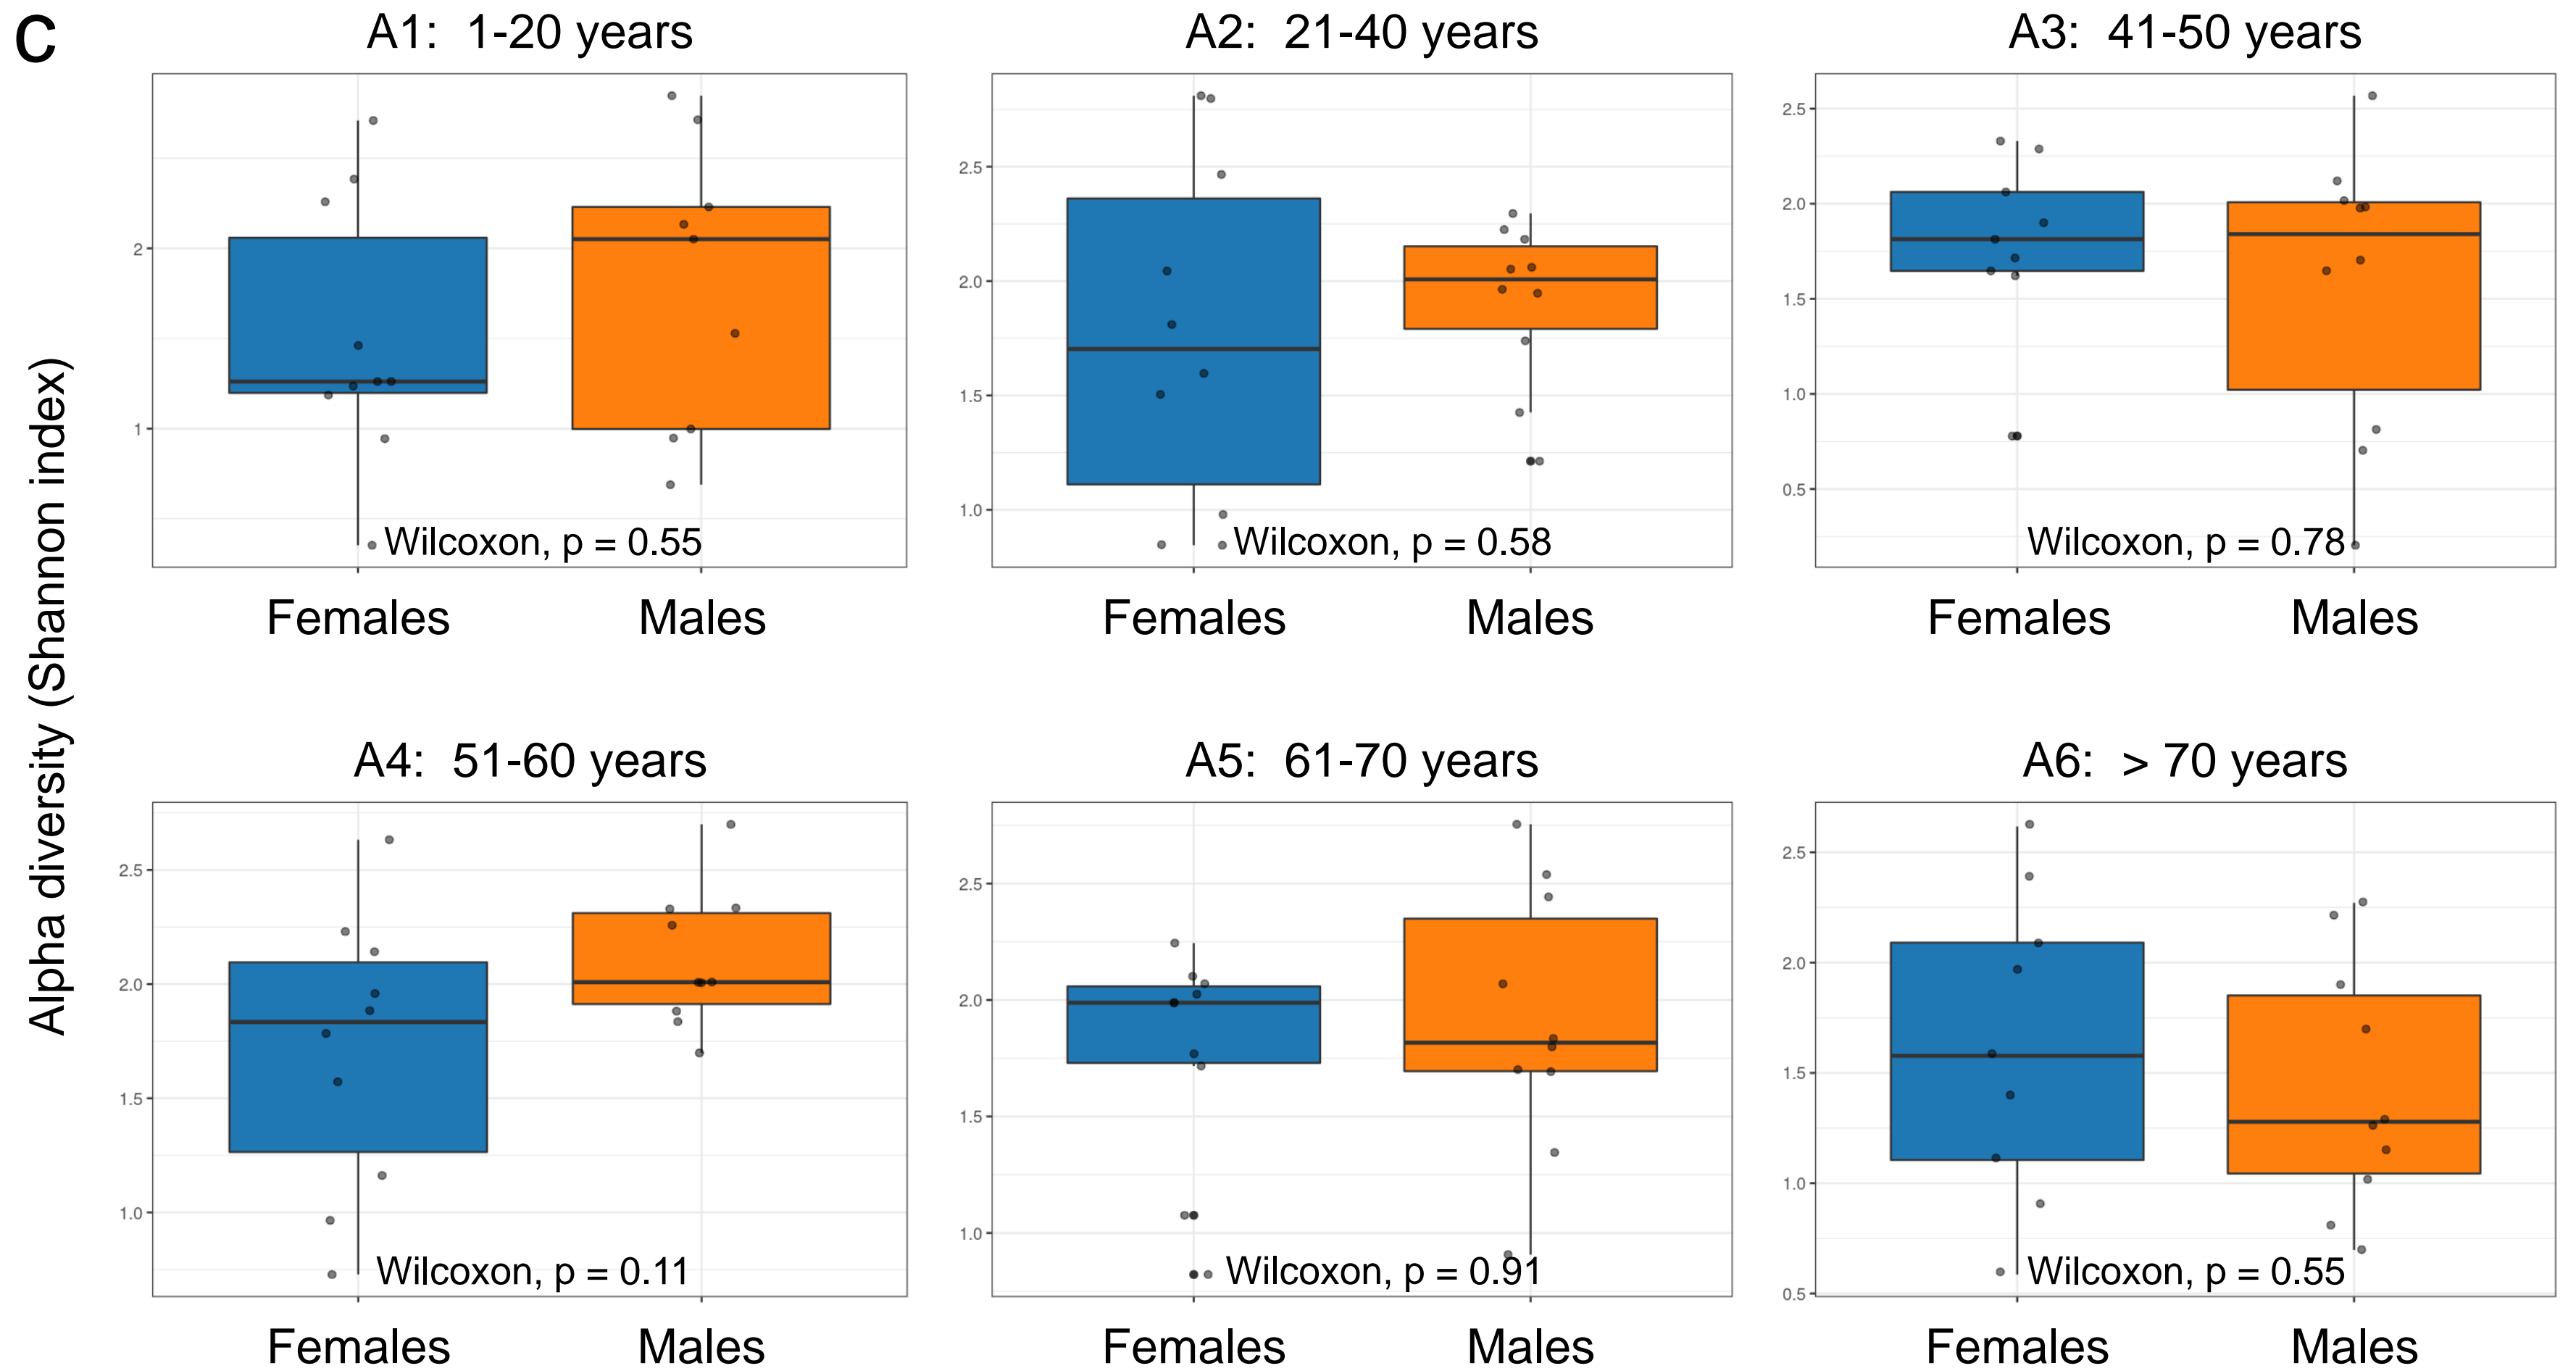

# Figure 3

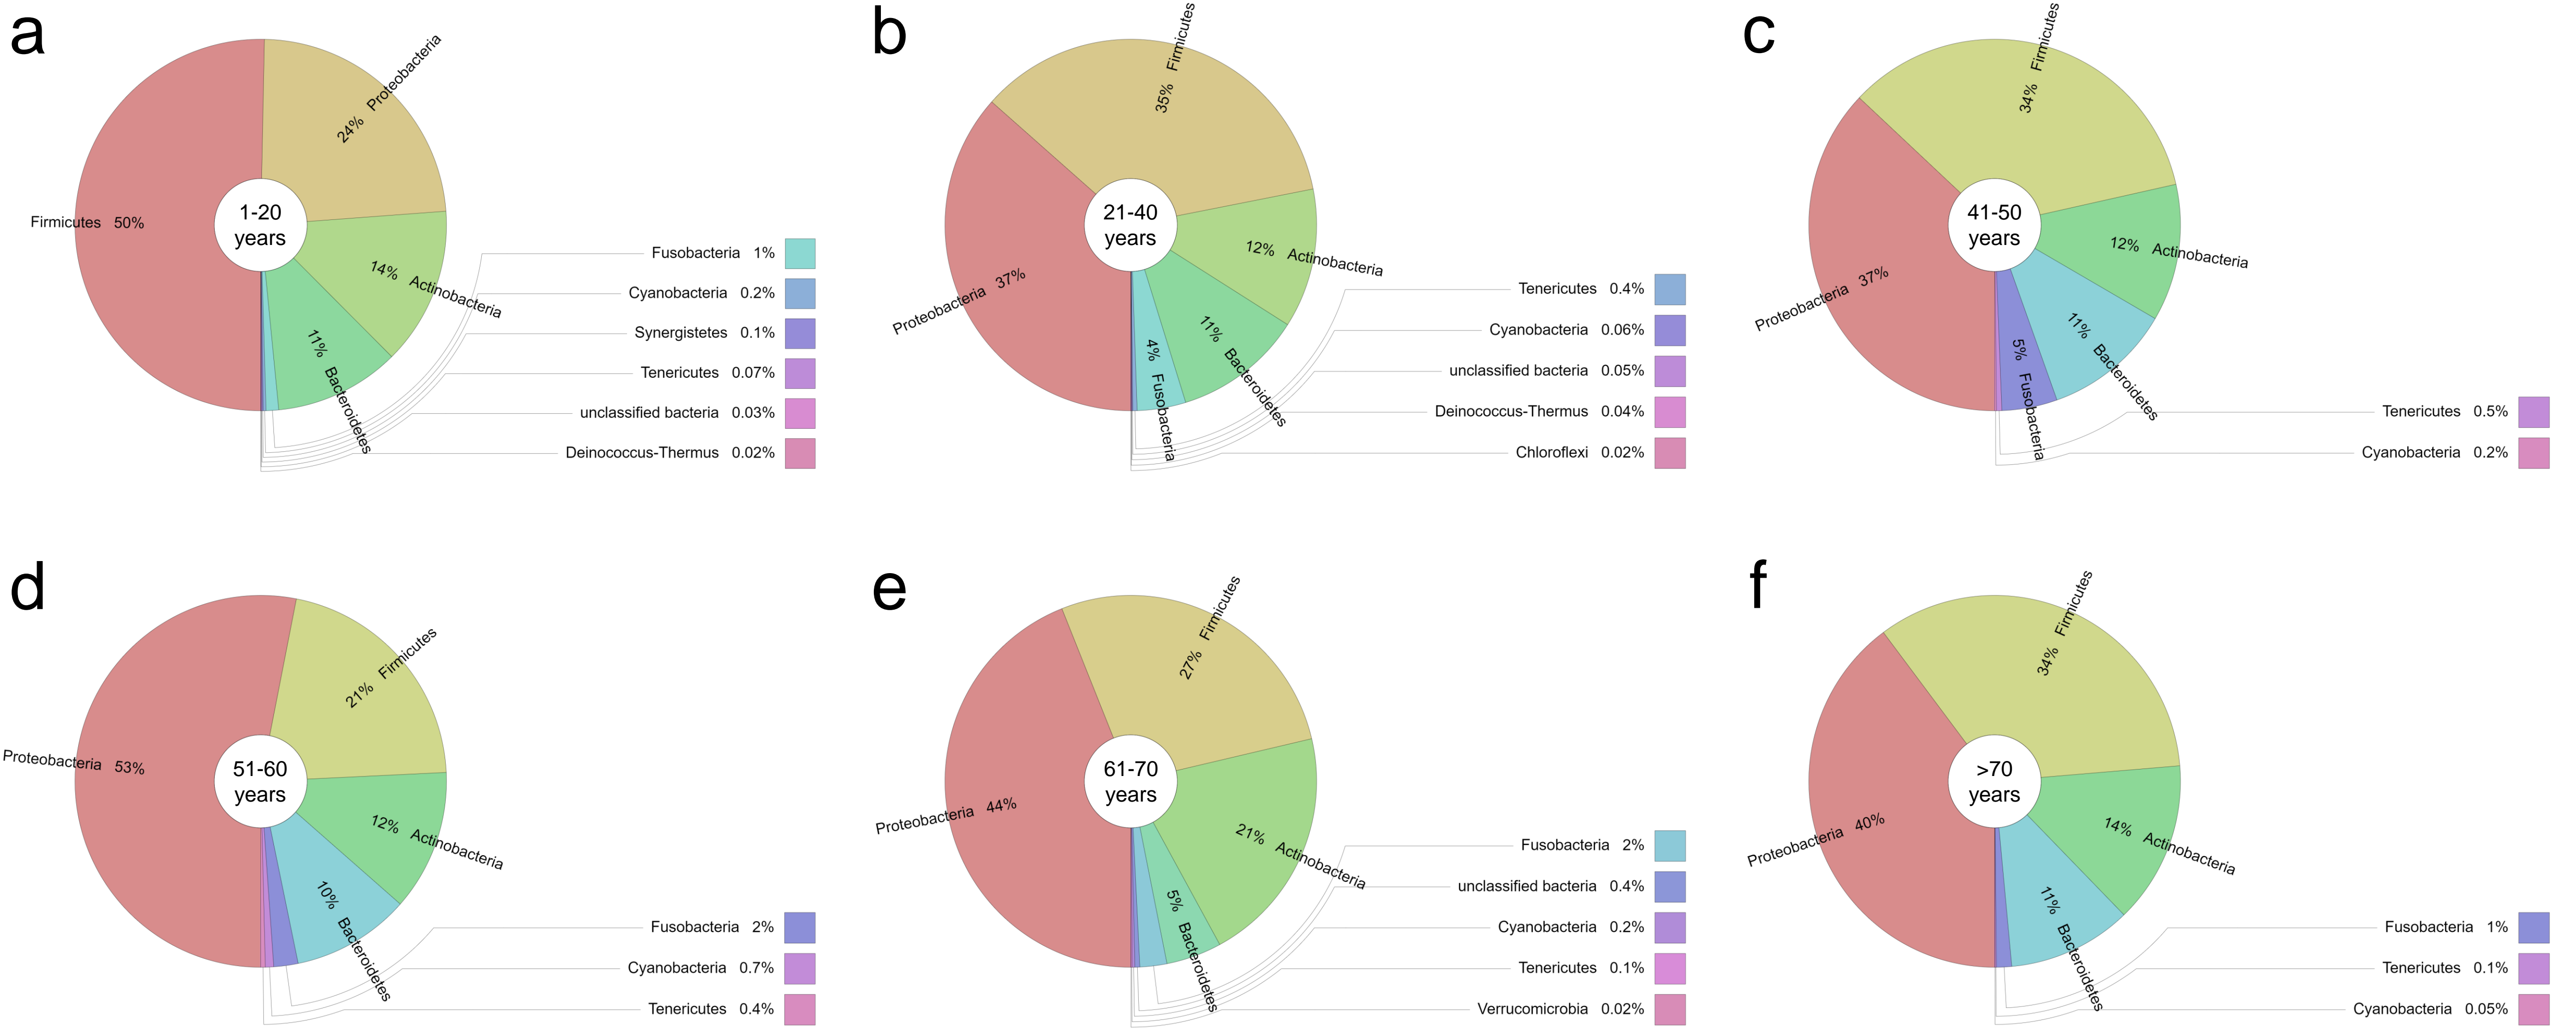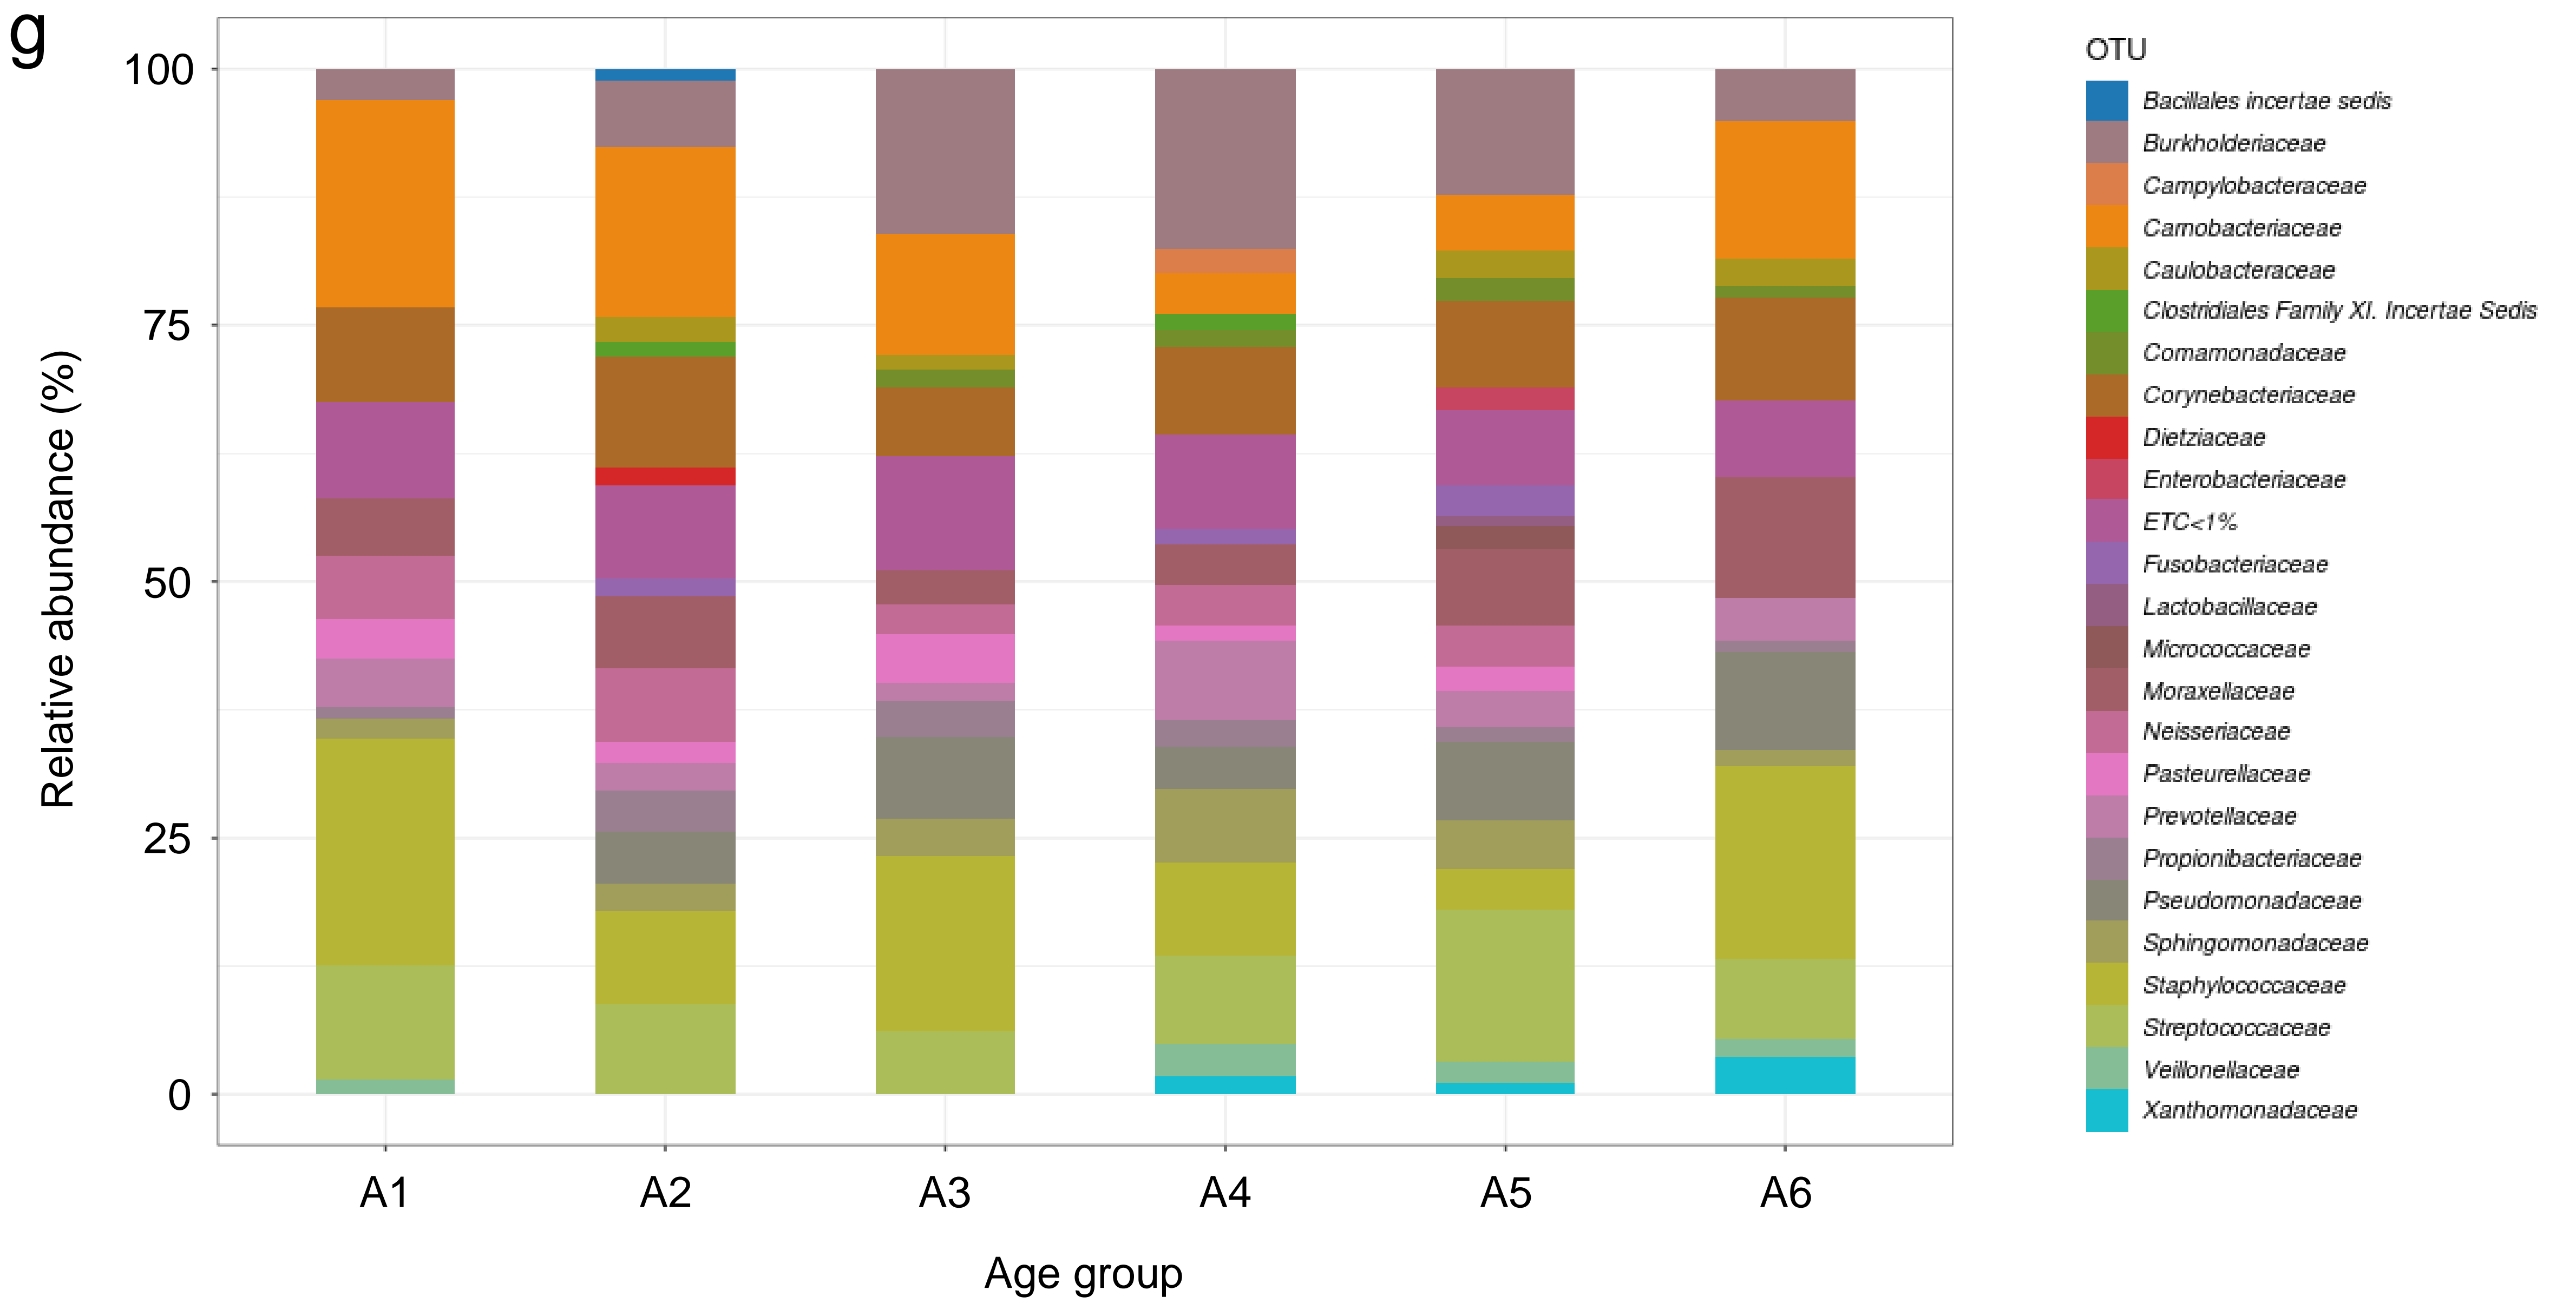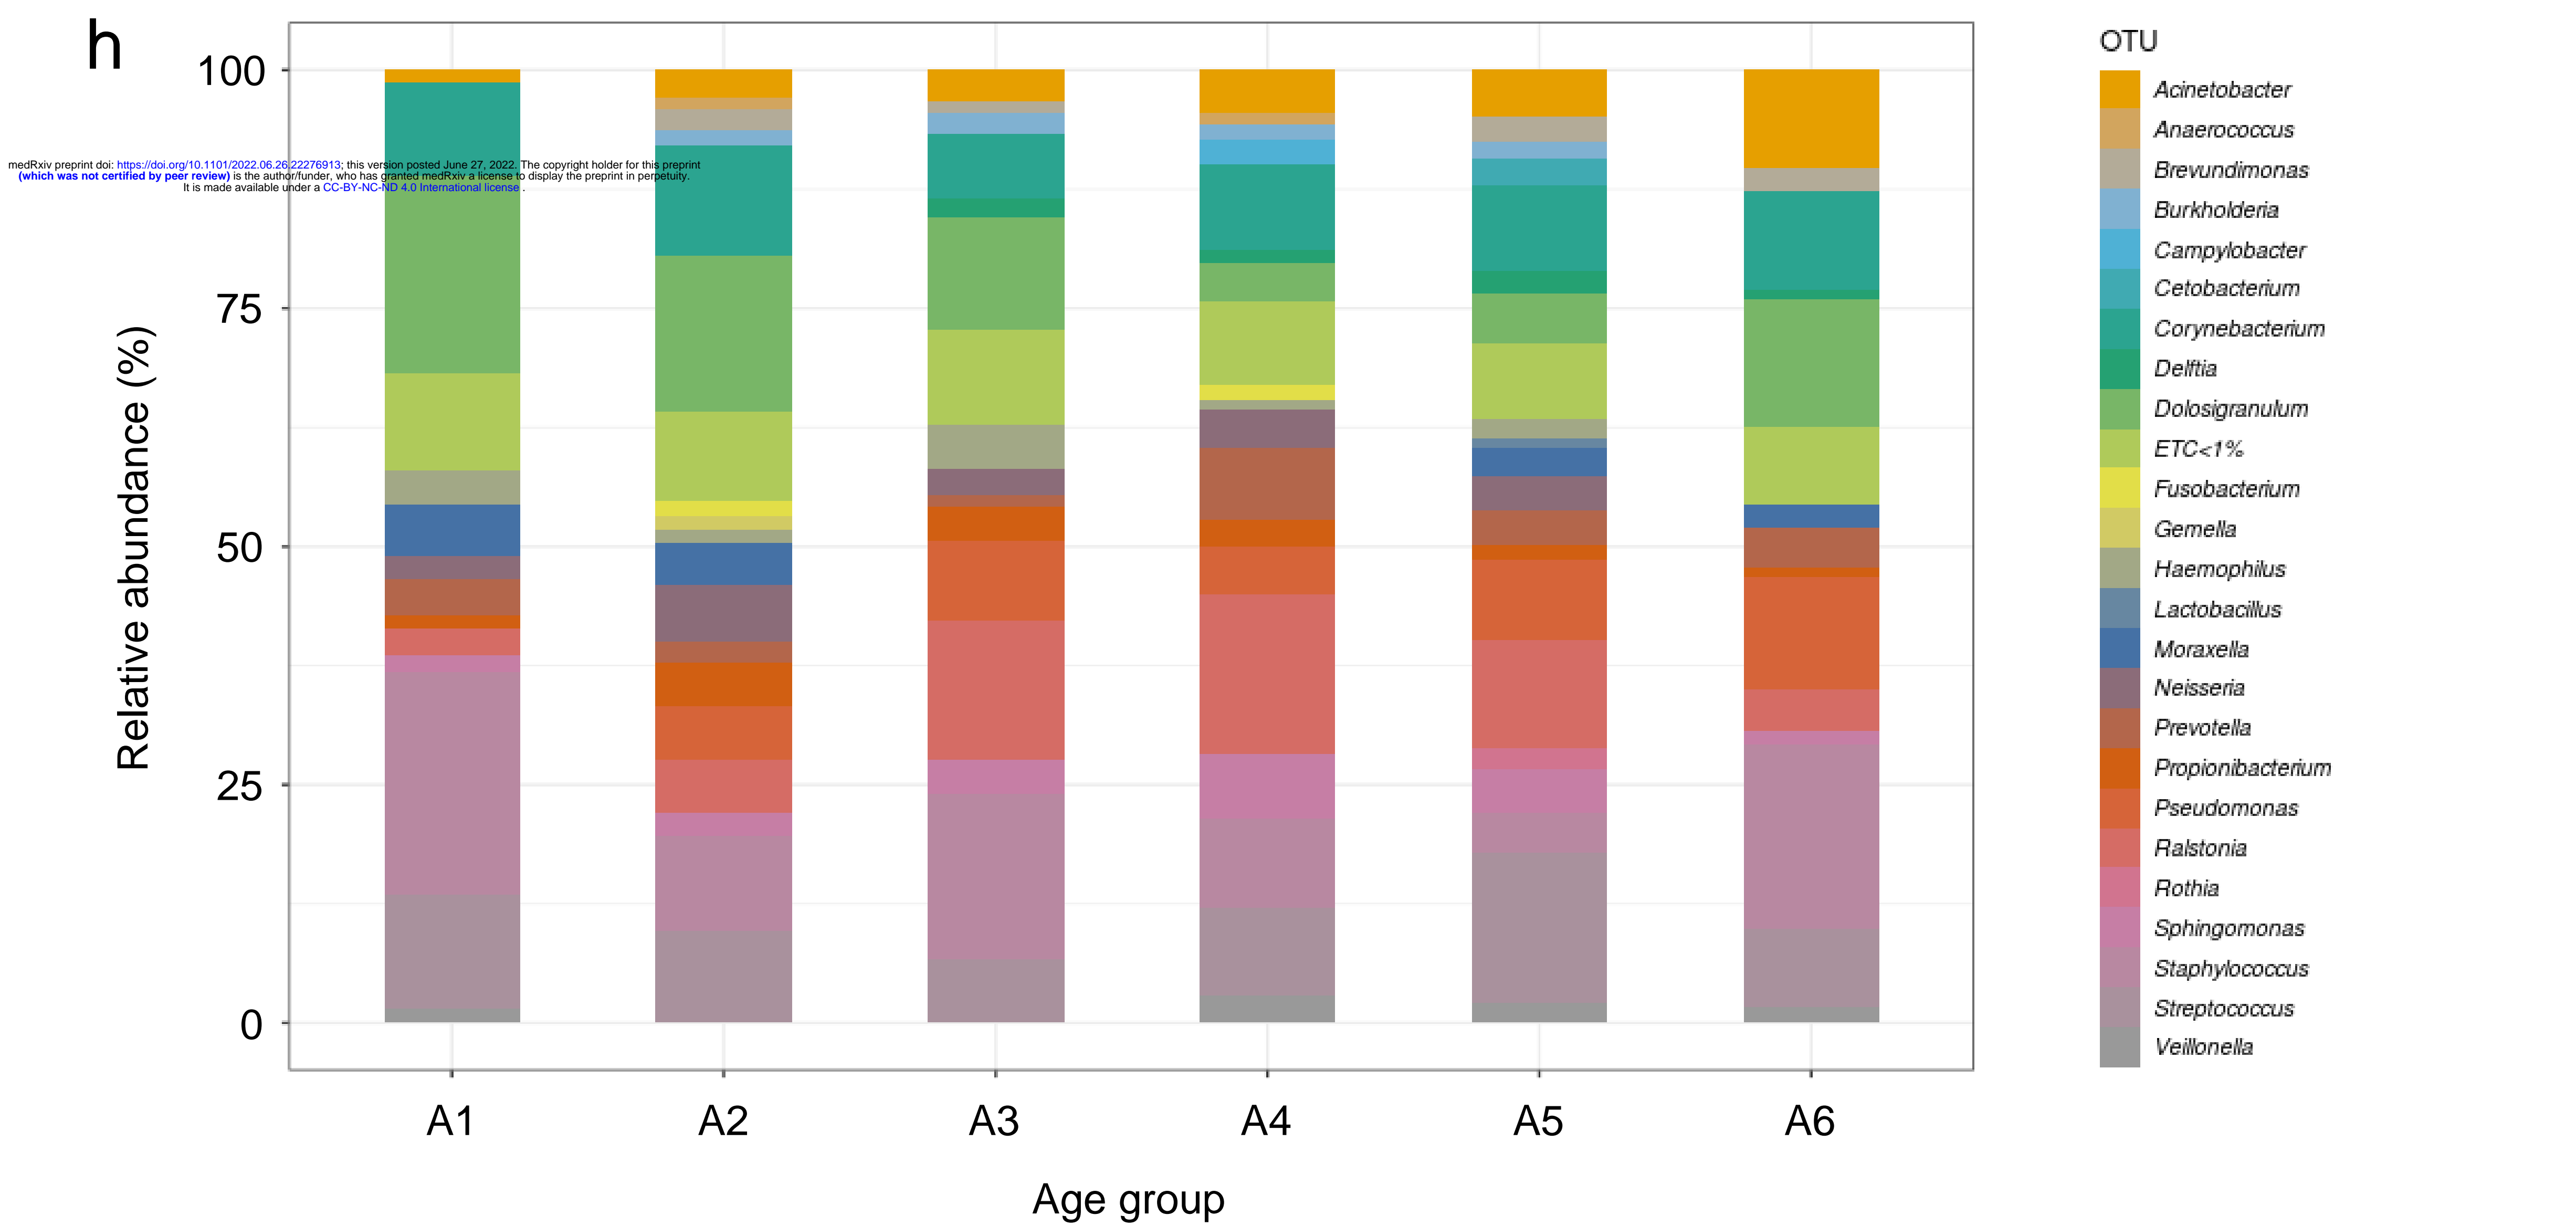



# Figure 4

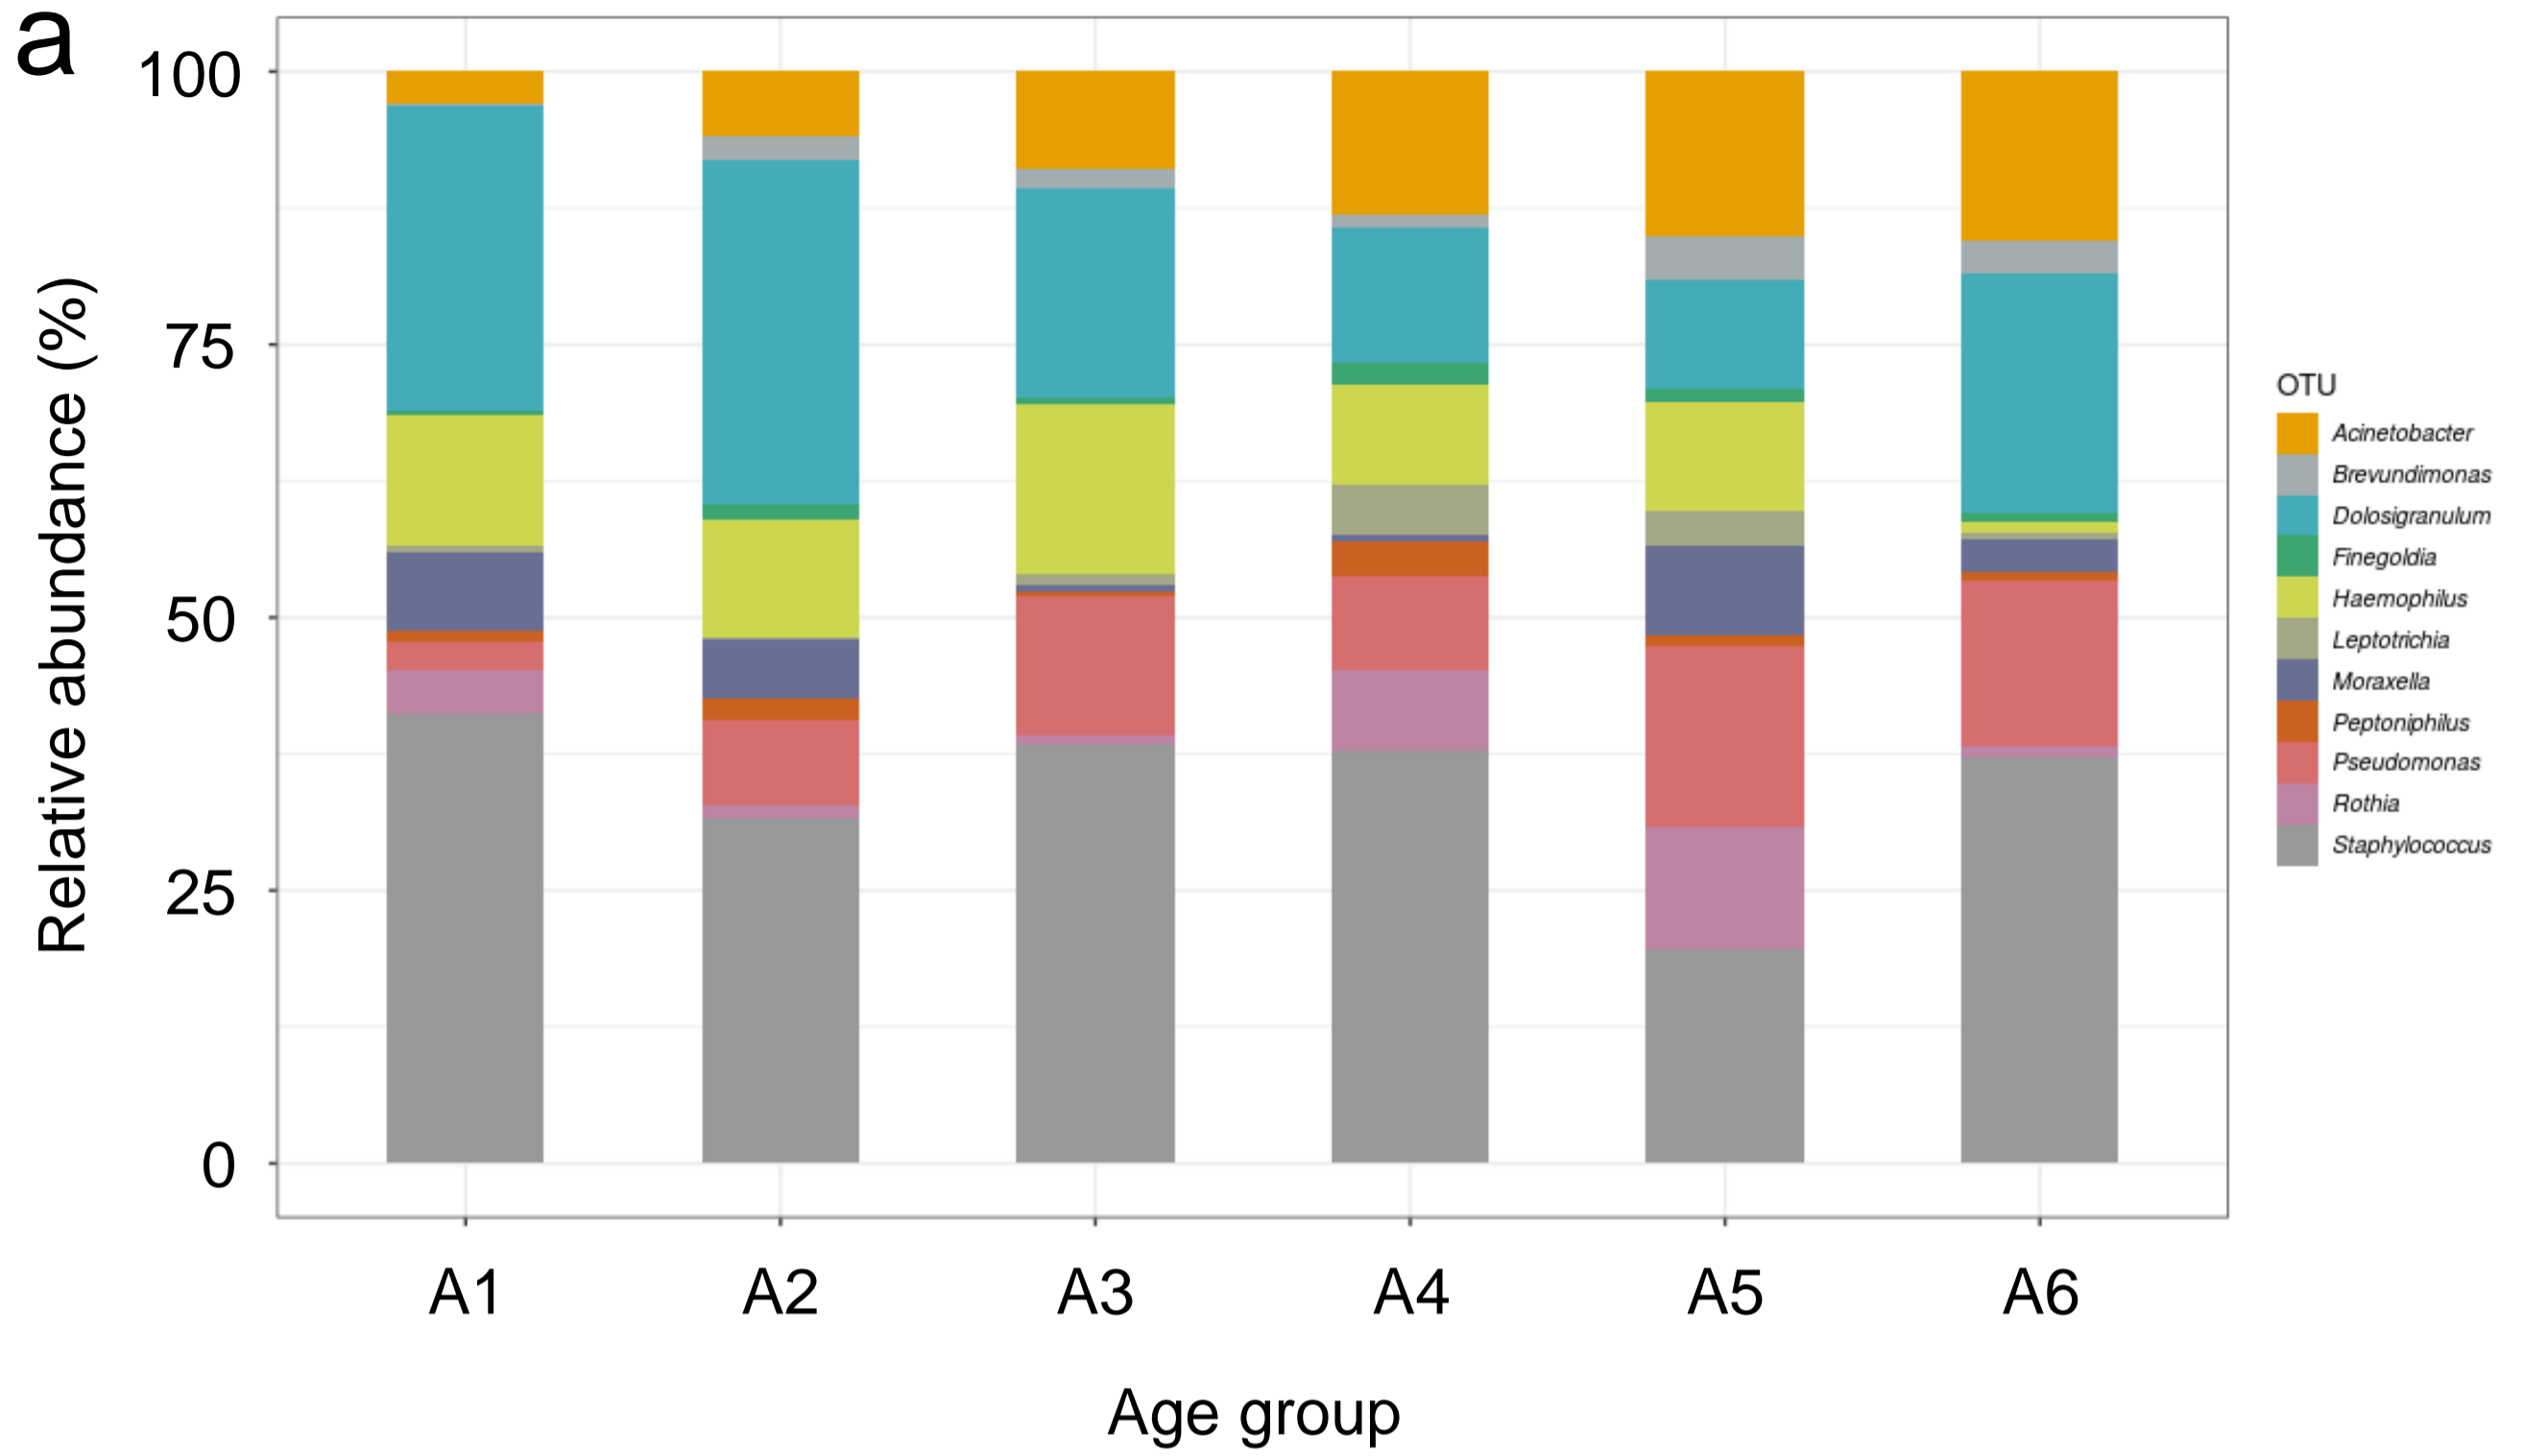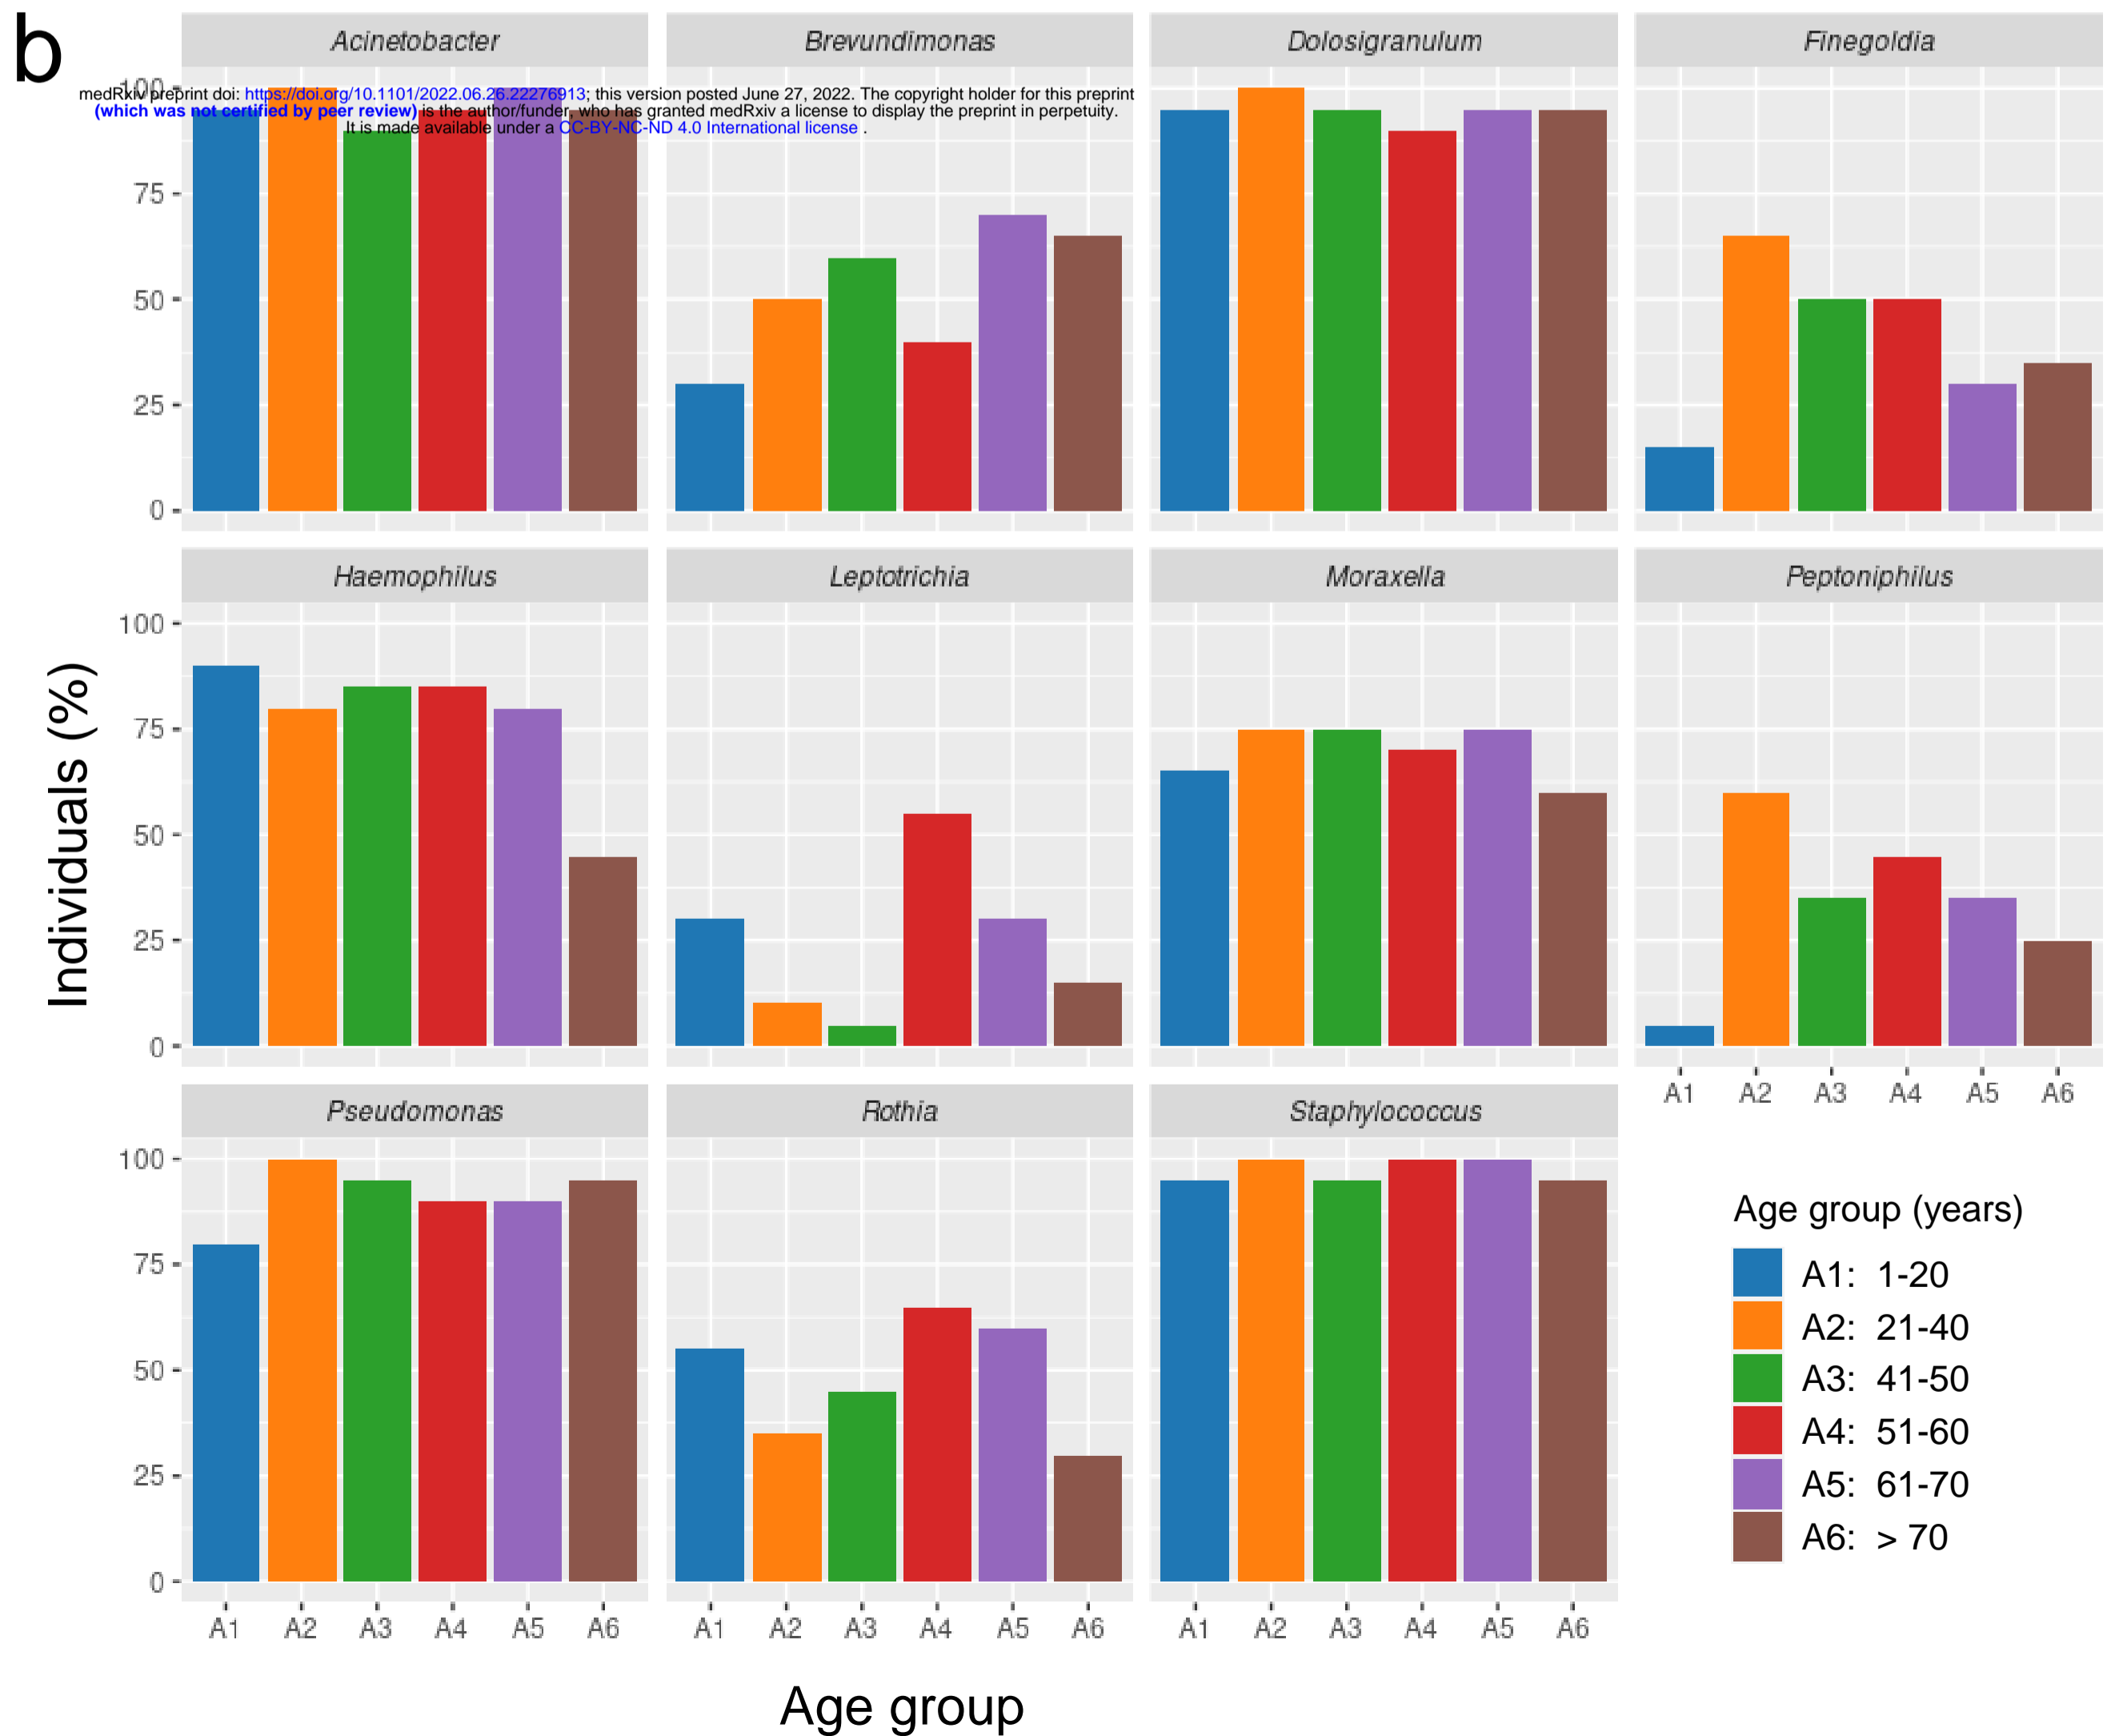

# Figure 5

**a**

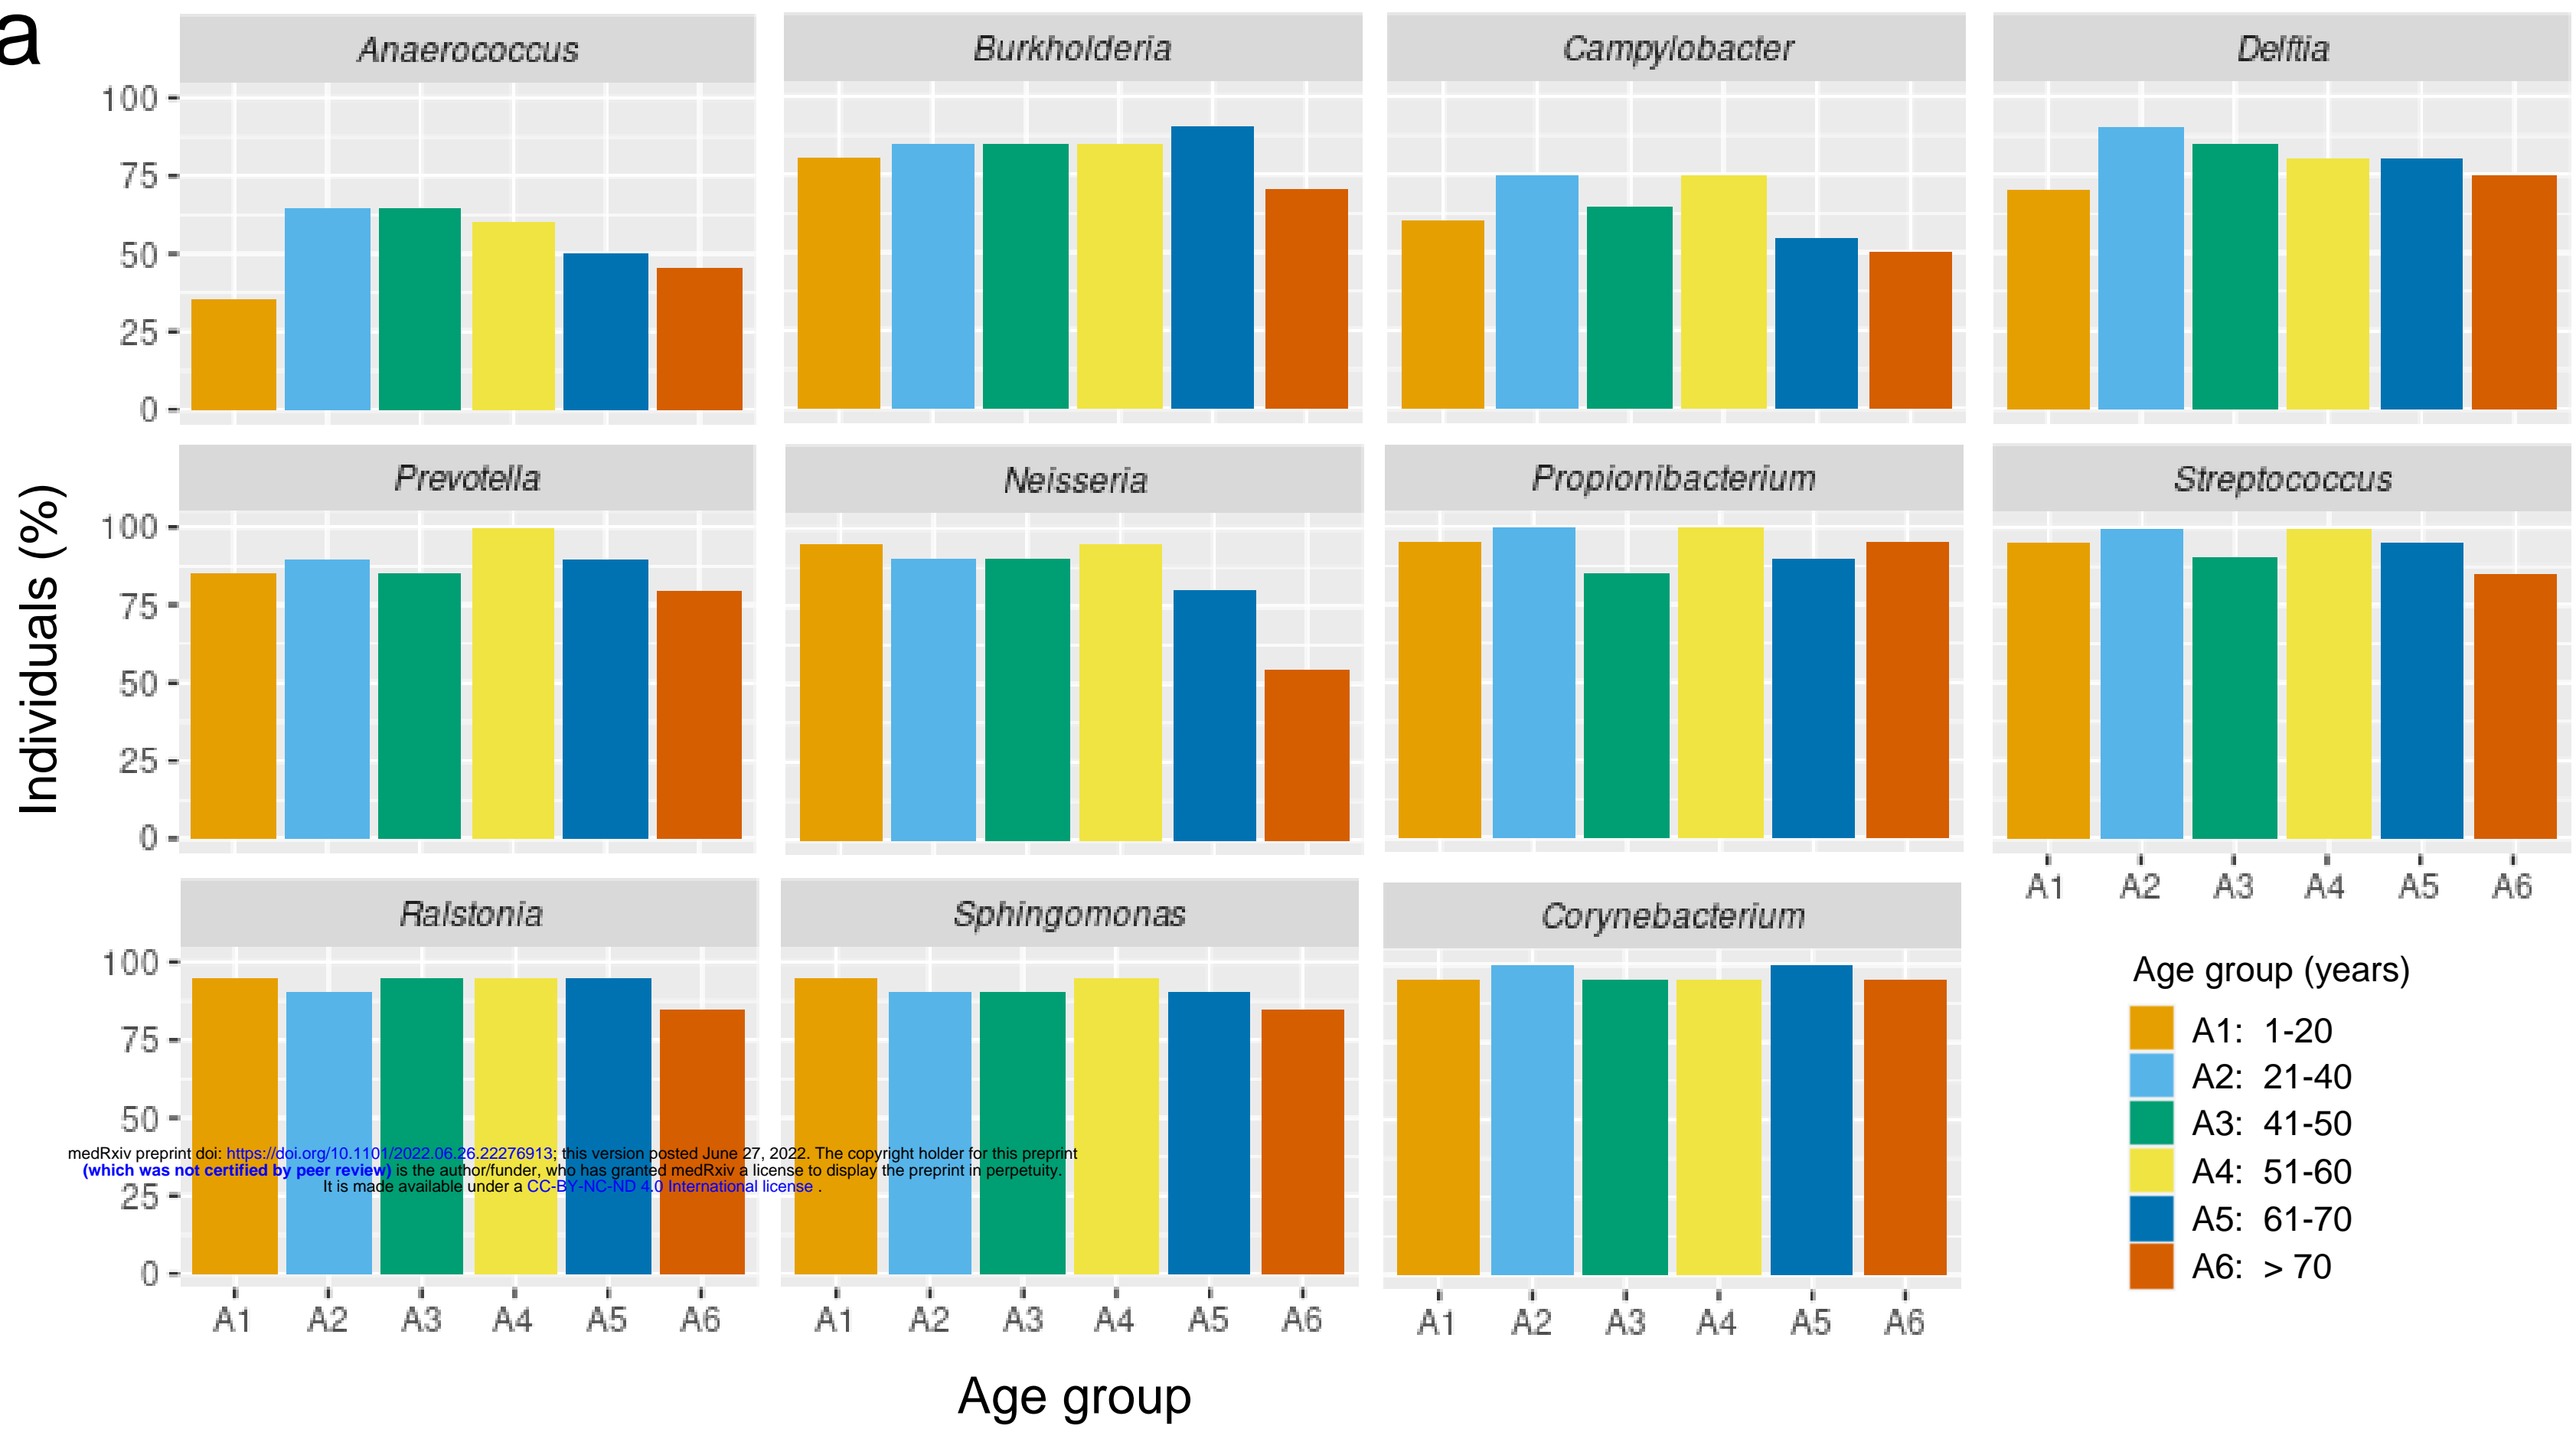

medRxiv preprint doi: <https://doi.org/10.1101/2022.06.26.22276913>; this version posted June 27, 2022. The copyright holder for this preprint (which was not certified by peer review) is the author/funder, who has granted medRxiv a license to display the preprint in perpetuity. It is made available under a CC-BY-NC-ND 4.0 International license.

**b**

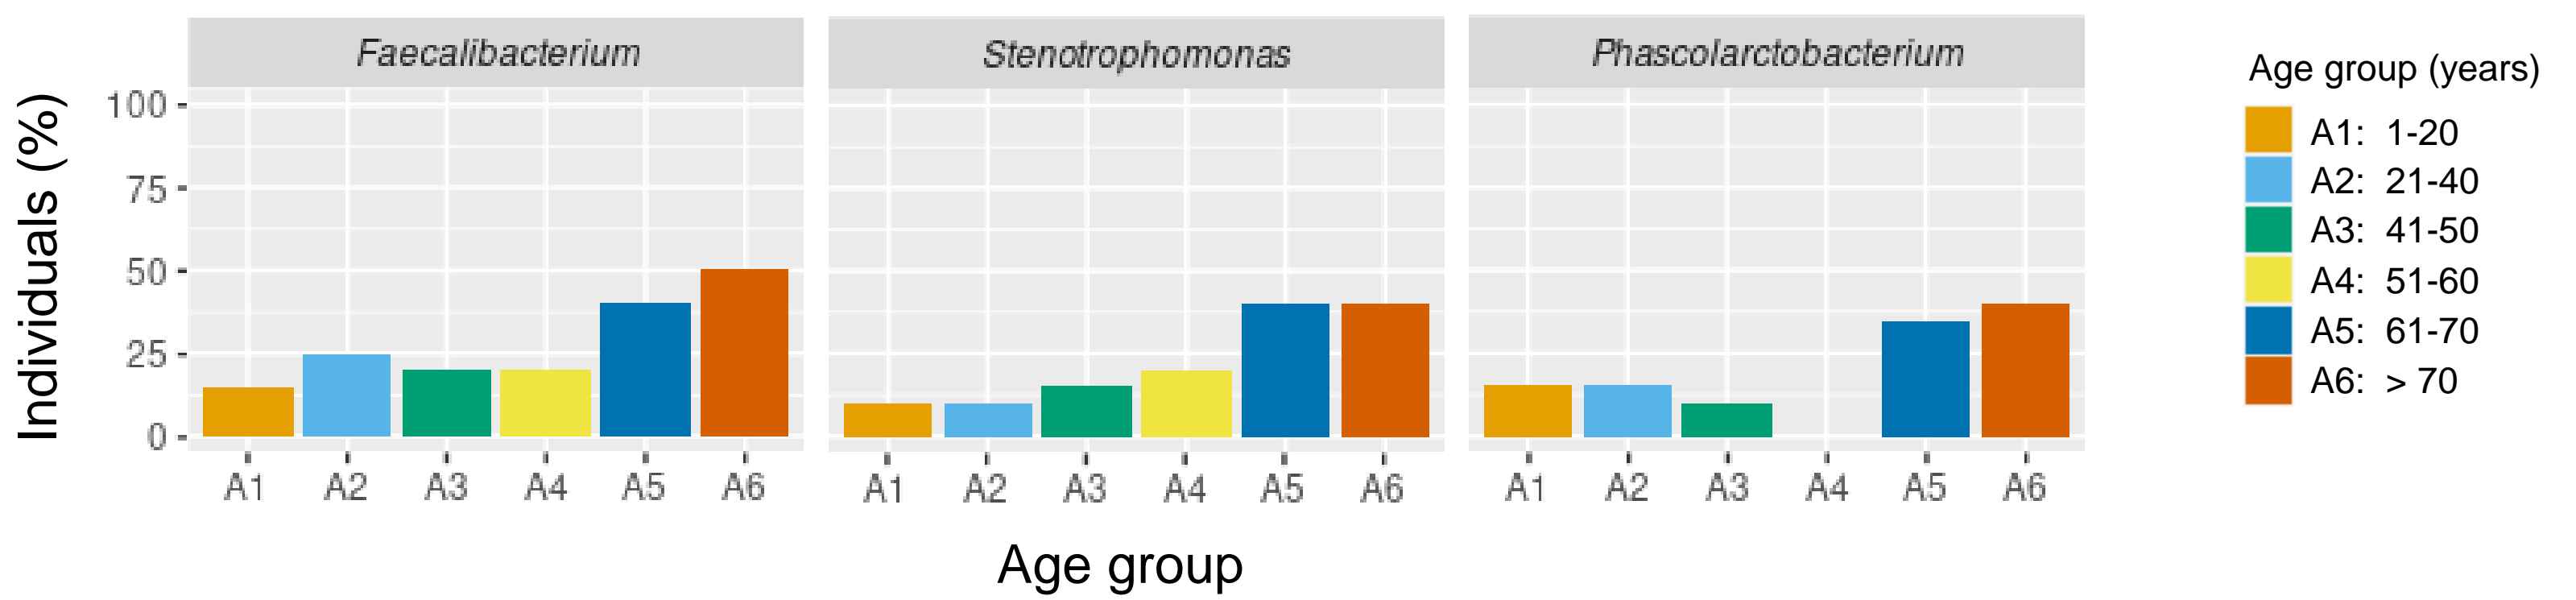

**c**

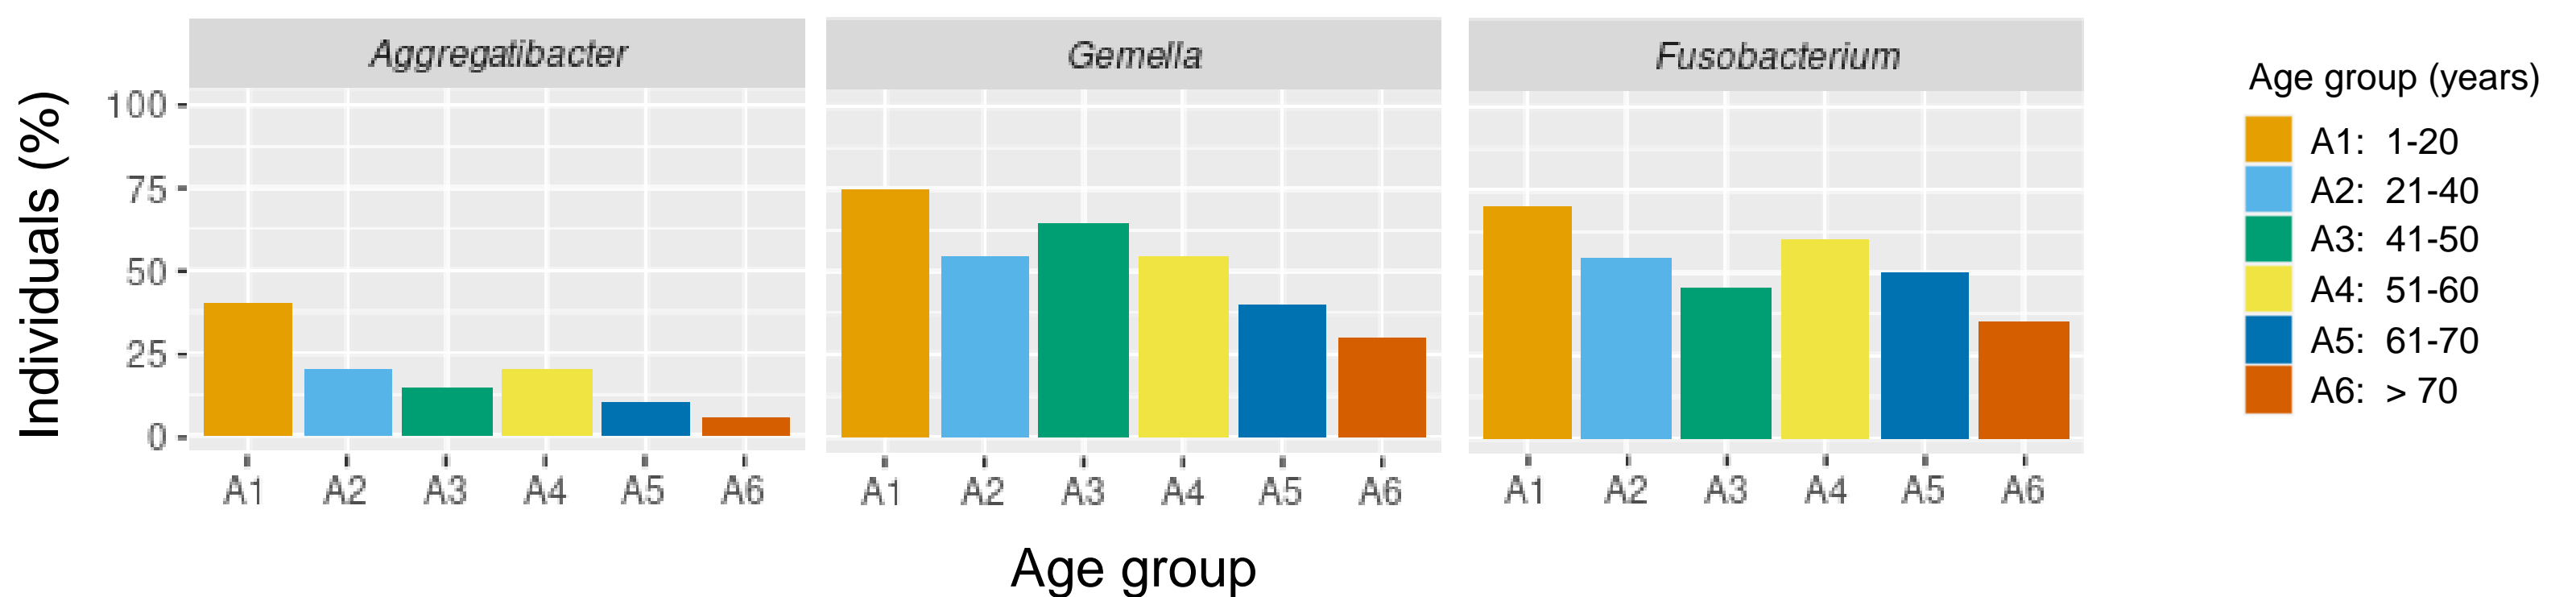

# Figure S1

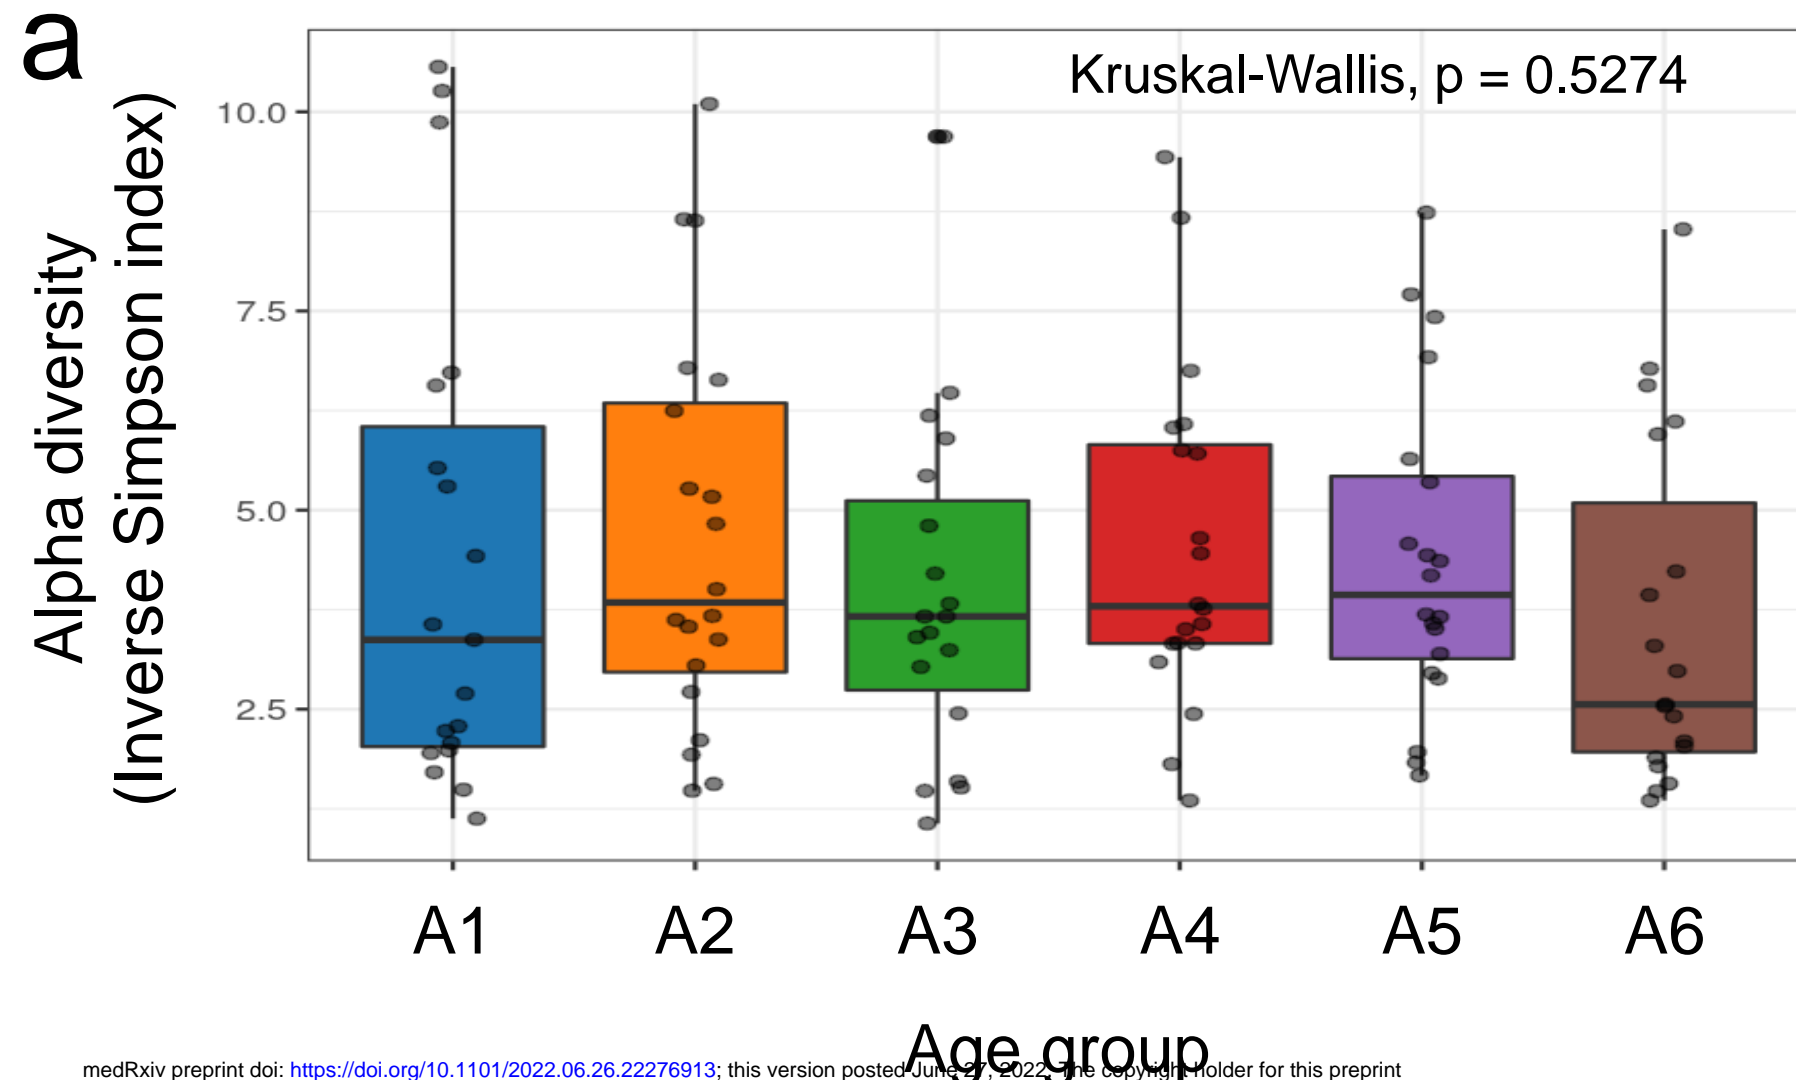

medRxiv preprint doi: <https://doi.org/10.1101/2022.06.26.22276913>; this version posted June 27, 2022. The copyright holder for this preprint (which was not certified by peer review) is the author/funder, who has granted medRxiv a license to display the preprint in perpetuity. It is made available under a [CC-BY-NC-ND 4.0 International license](https://creativecommons.org/licenses/by-nc-nd/4.0/).

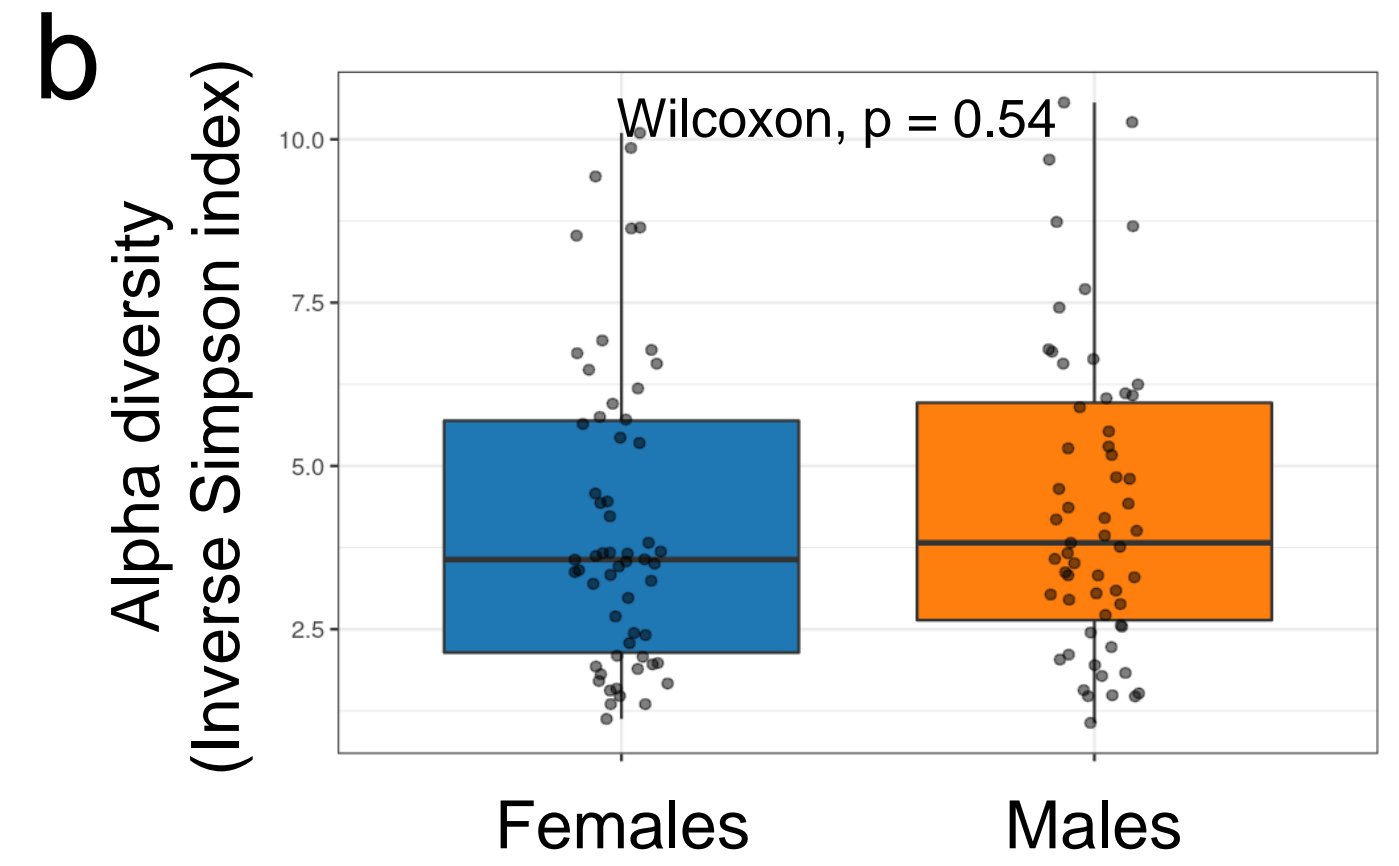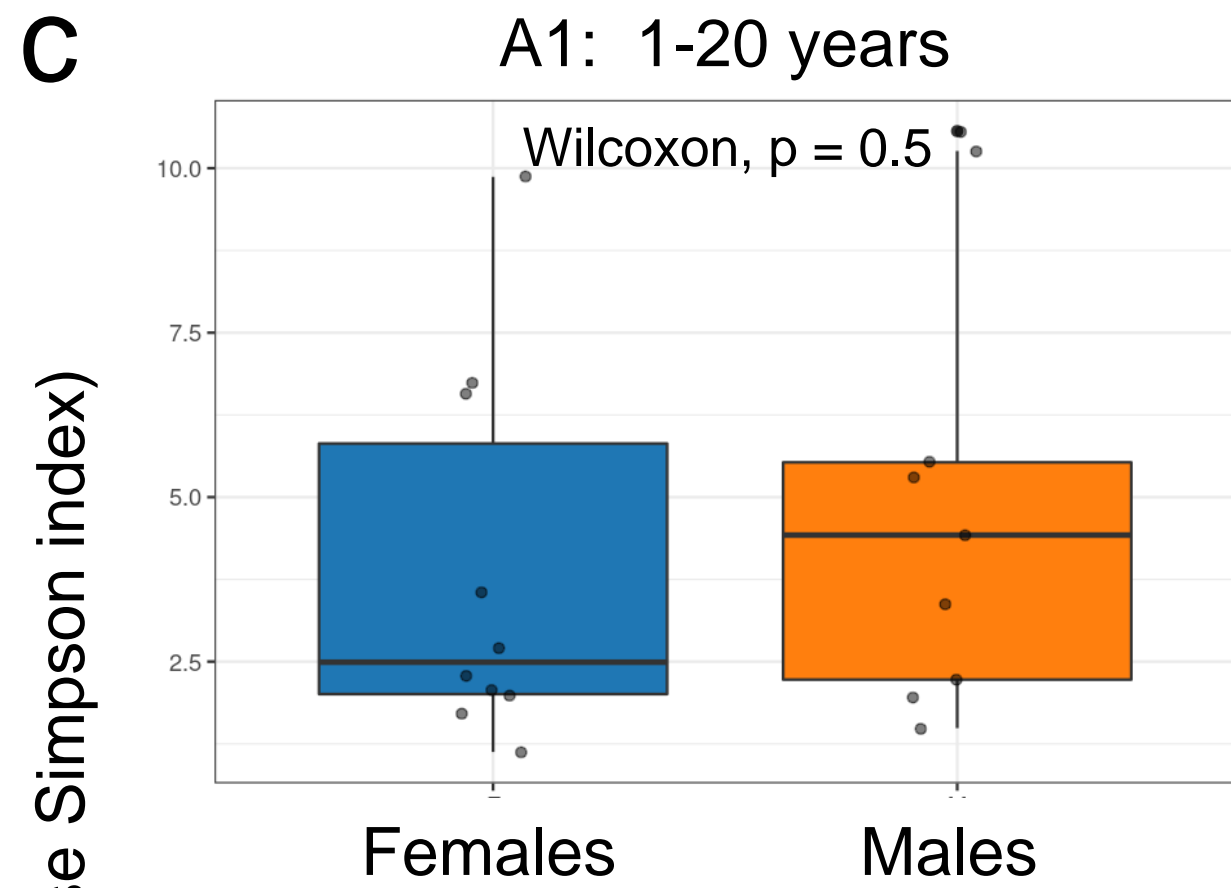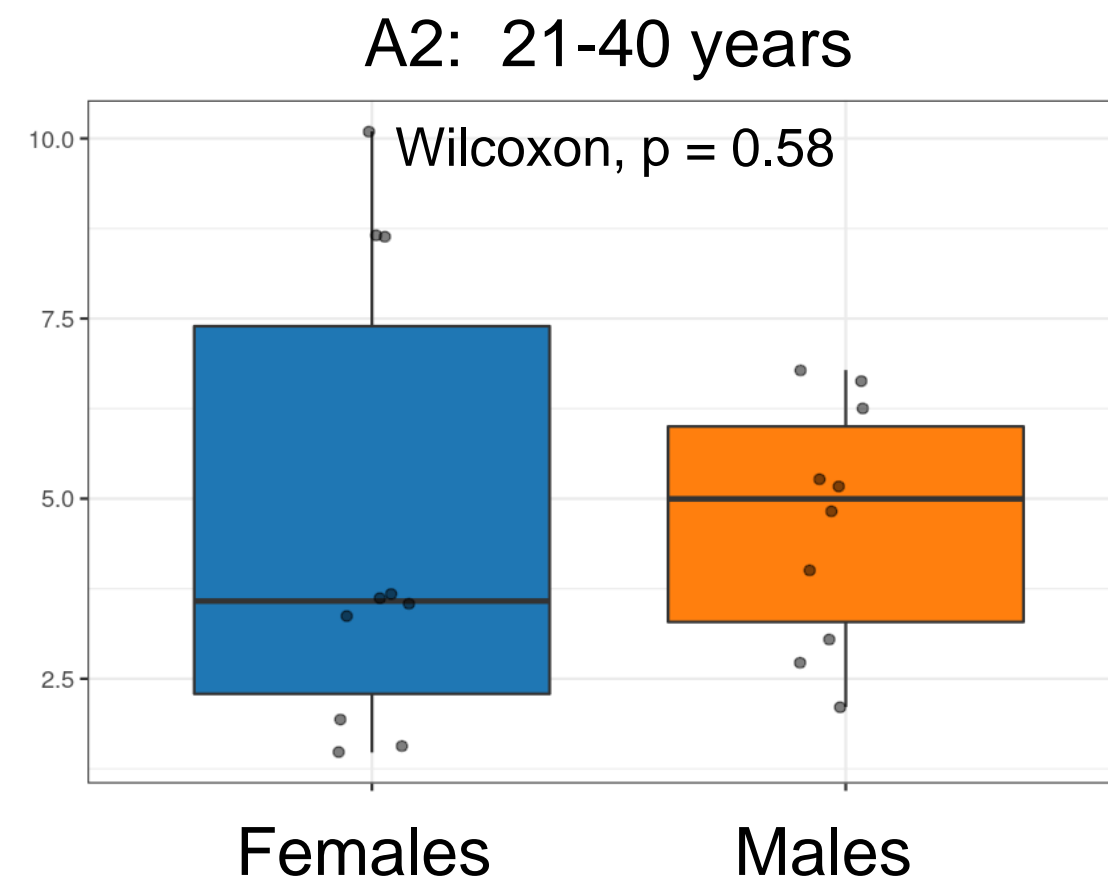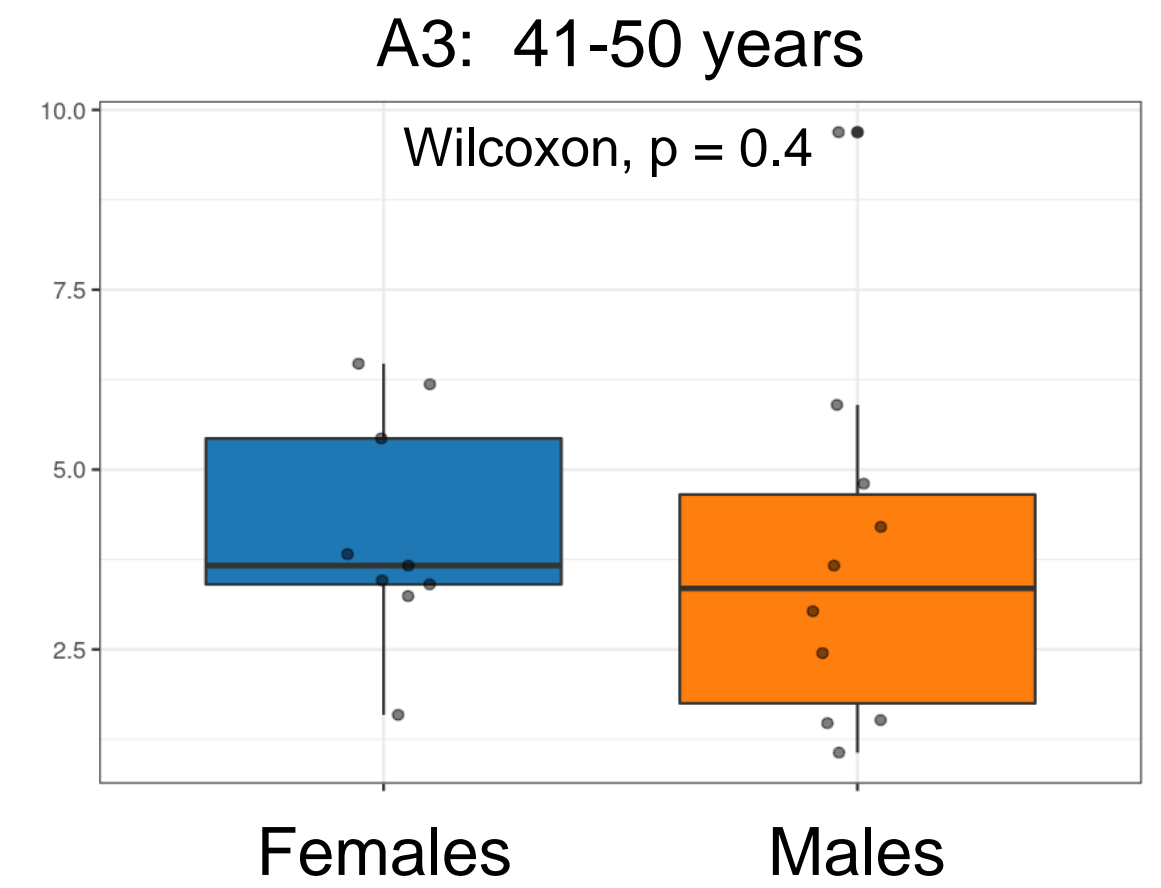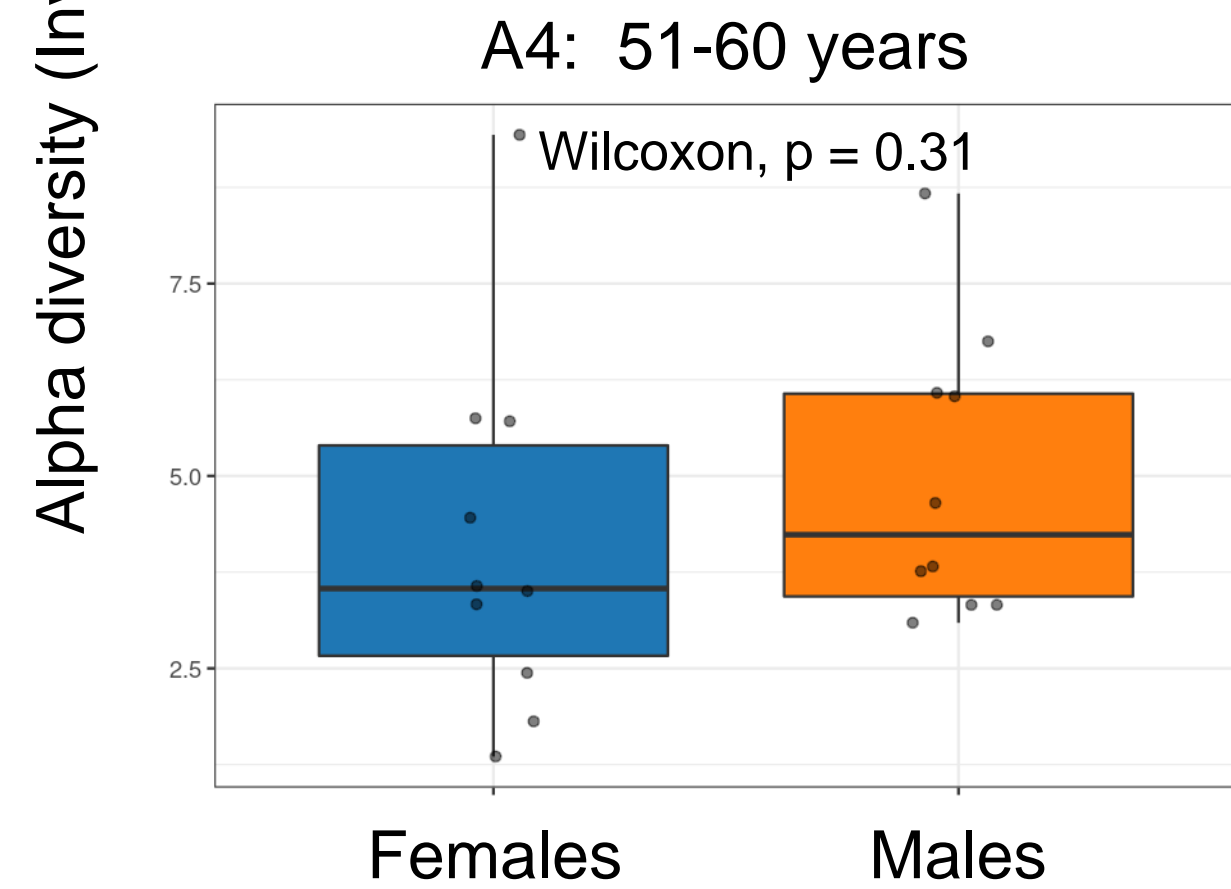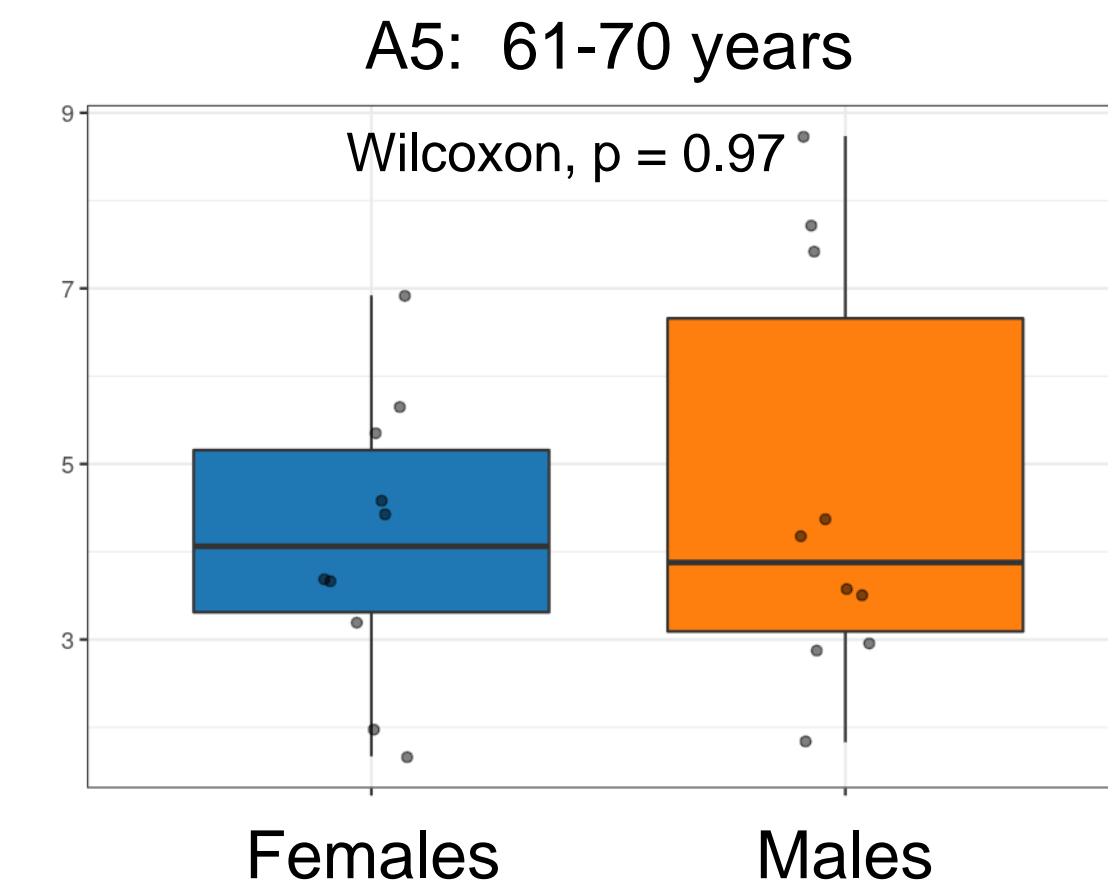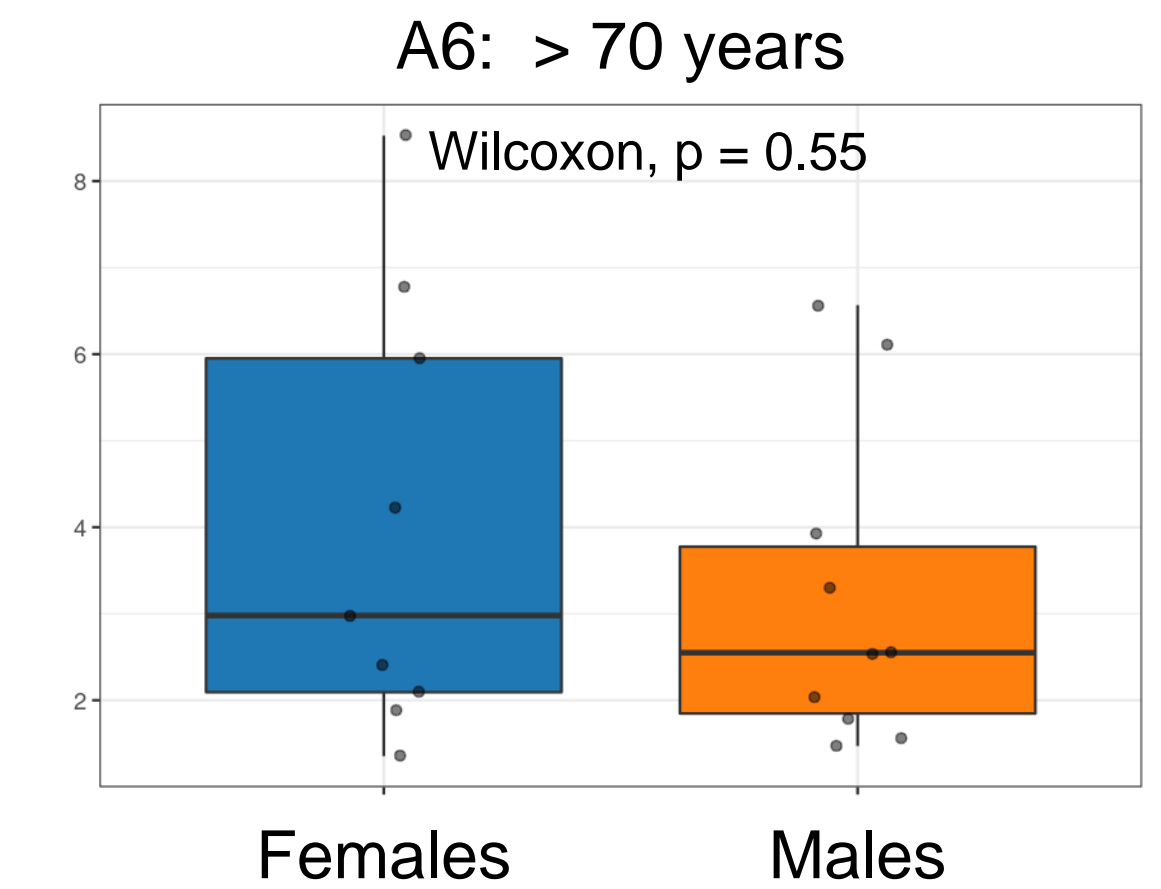

# Figure S2

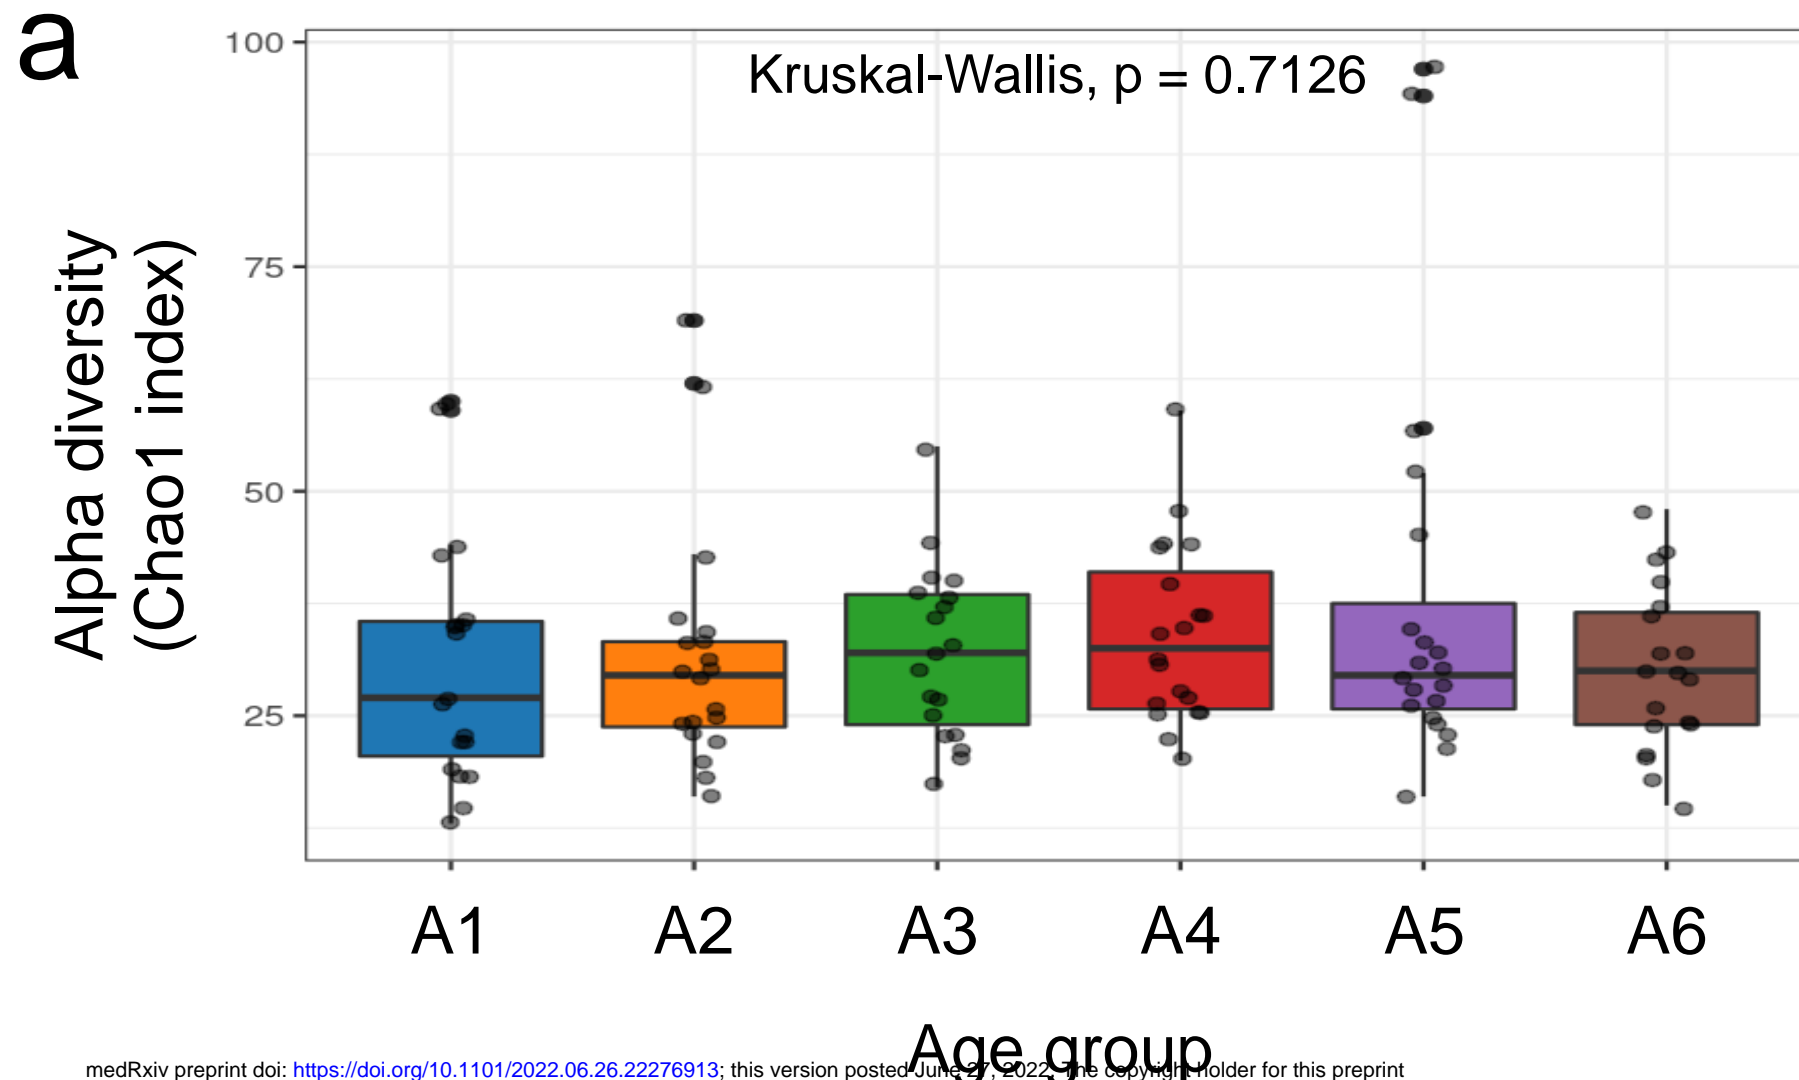

medRxiv preprint doi: <https://doi.org/10.1101/2022.06.26.22276913>; this version posted June 27, 2022. The copyright holder for this preprint (which was not certified by peer review) is the author/funder, who has granted medRxiv a license to display the preprint in perpetuity. It is made available under a [CC-BY-NC-ND 4.0 International license](https://creativecommons.org/licenses/by-nc-nd/4.0/).

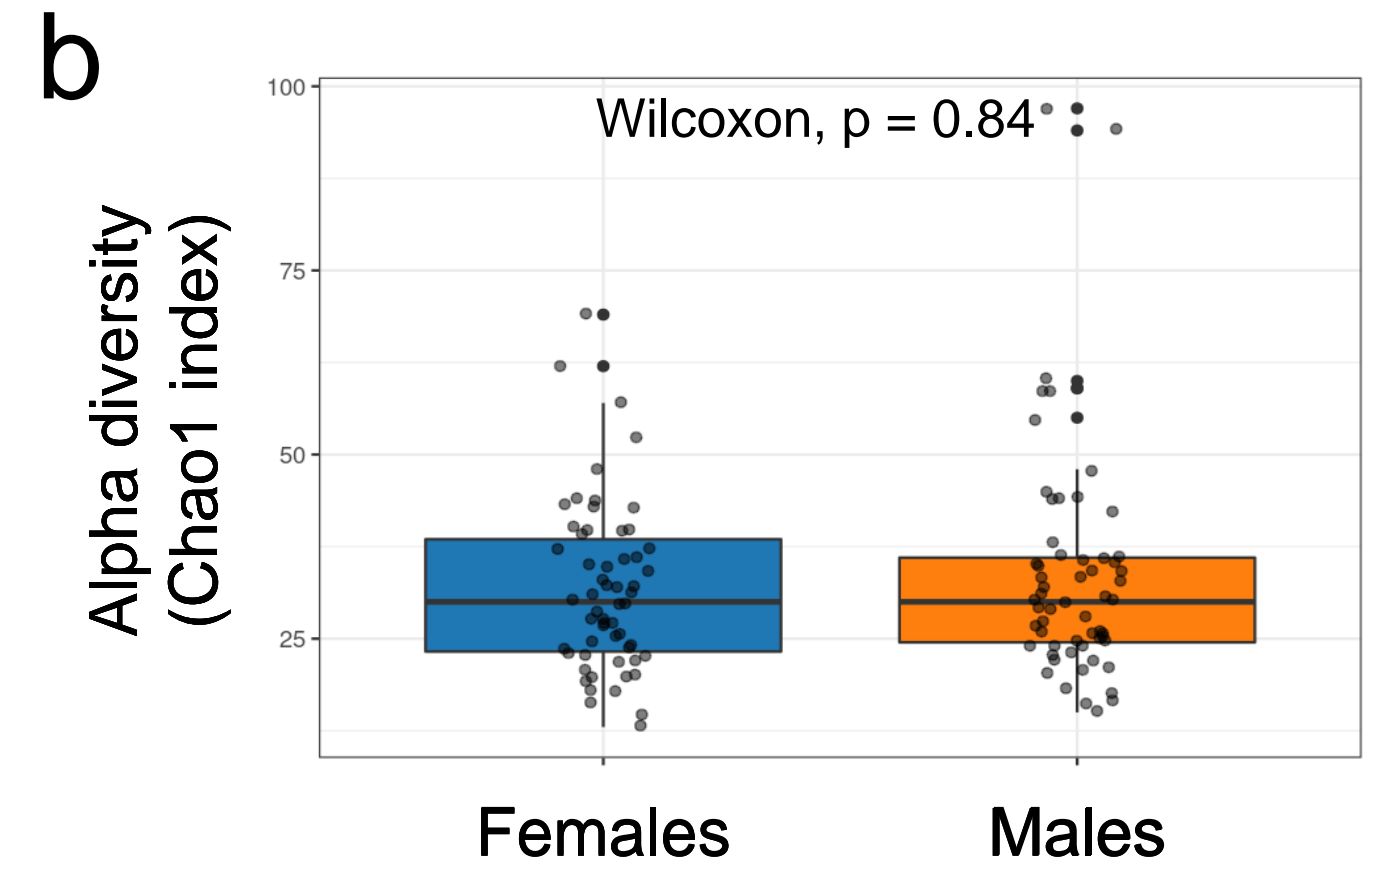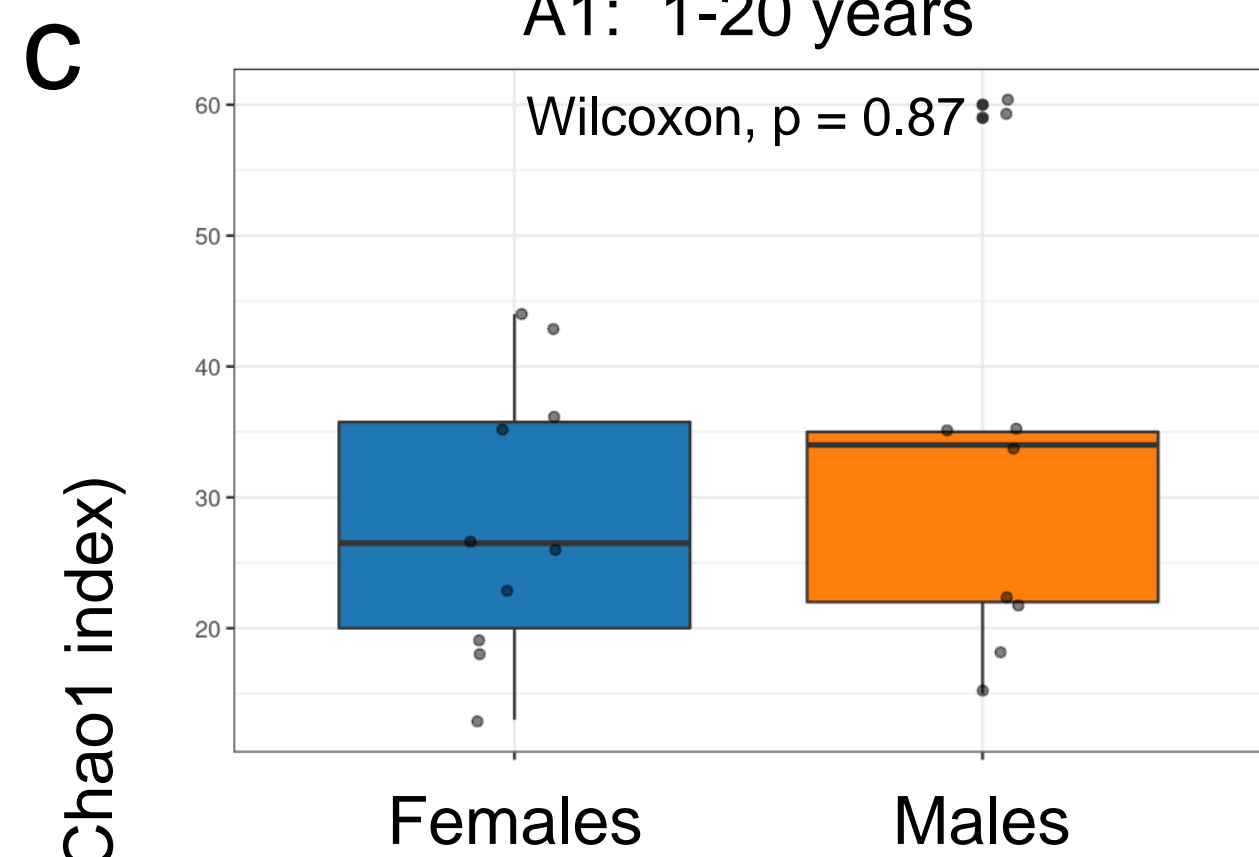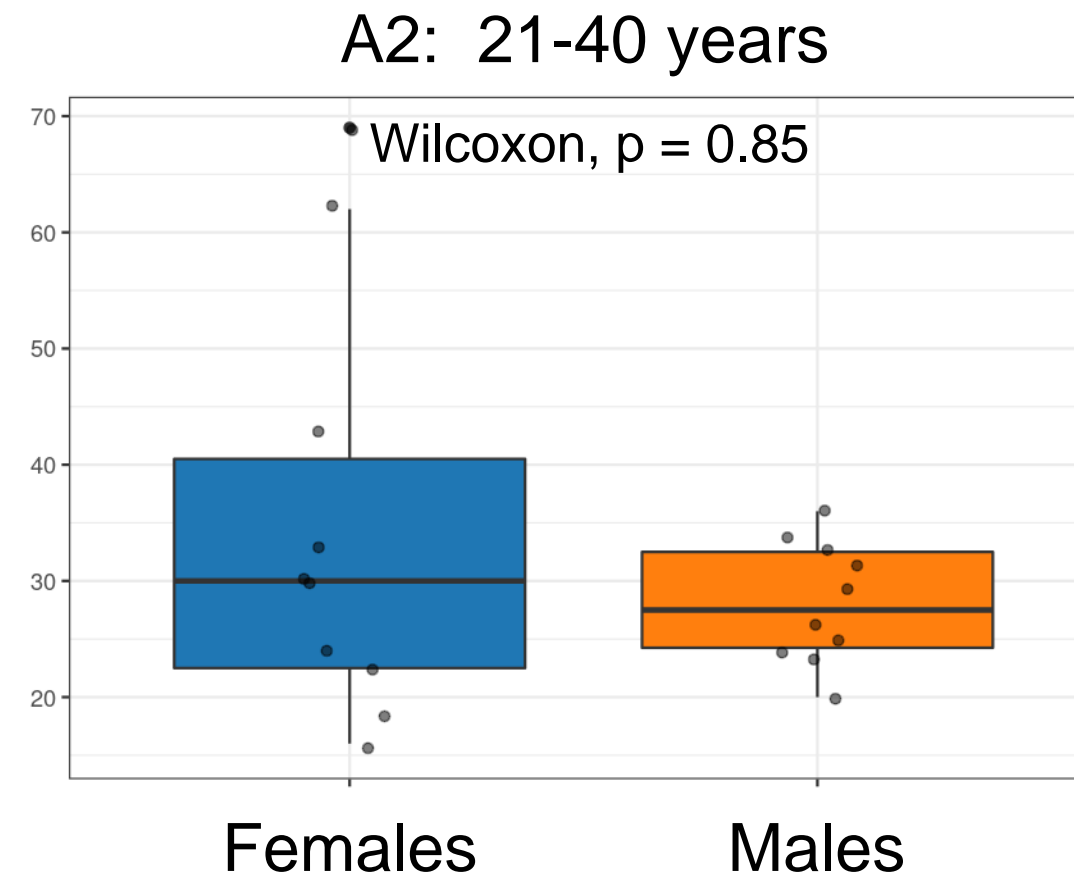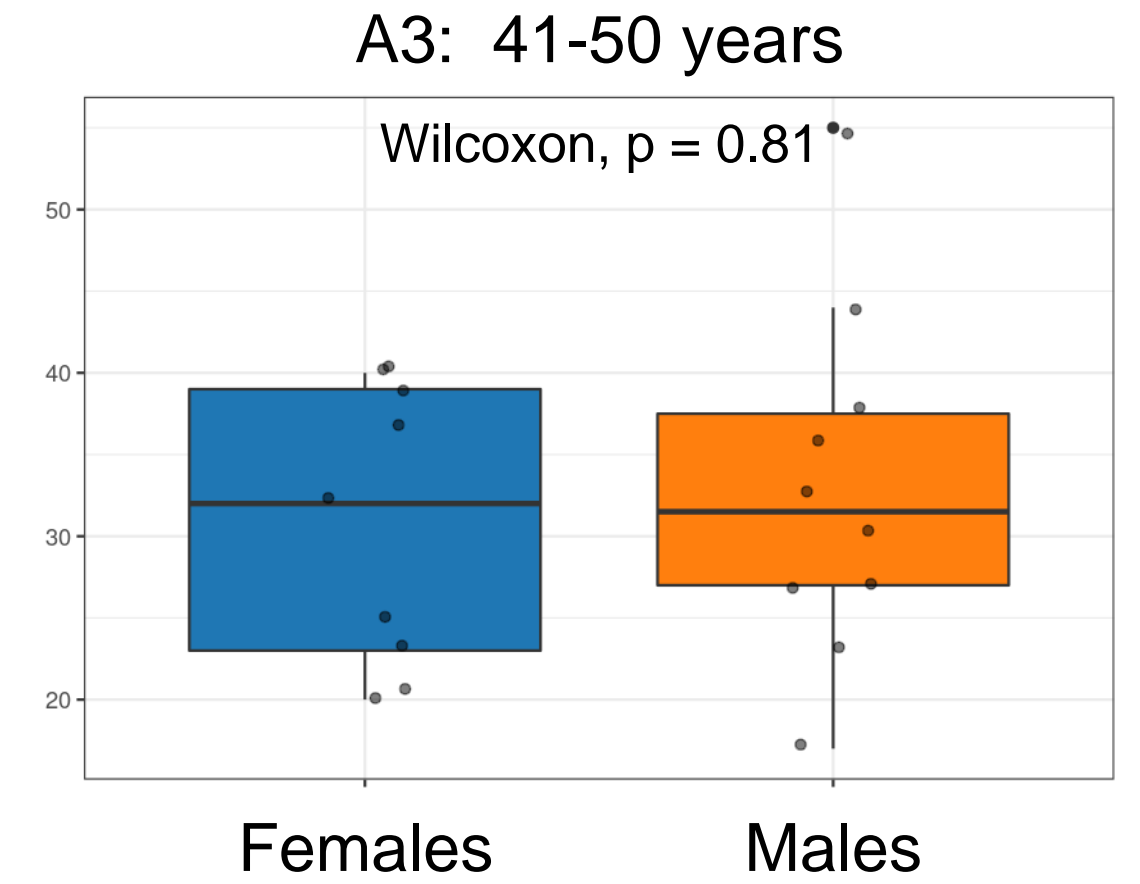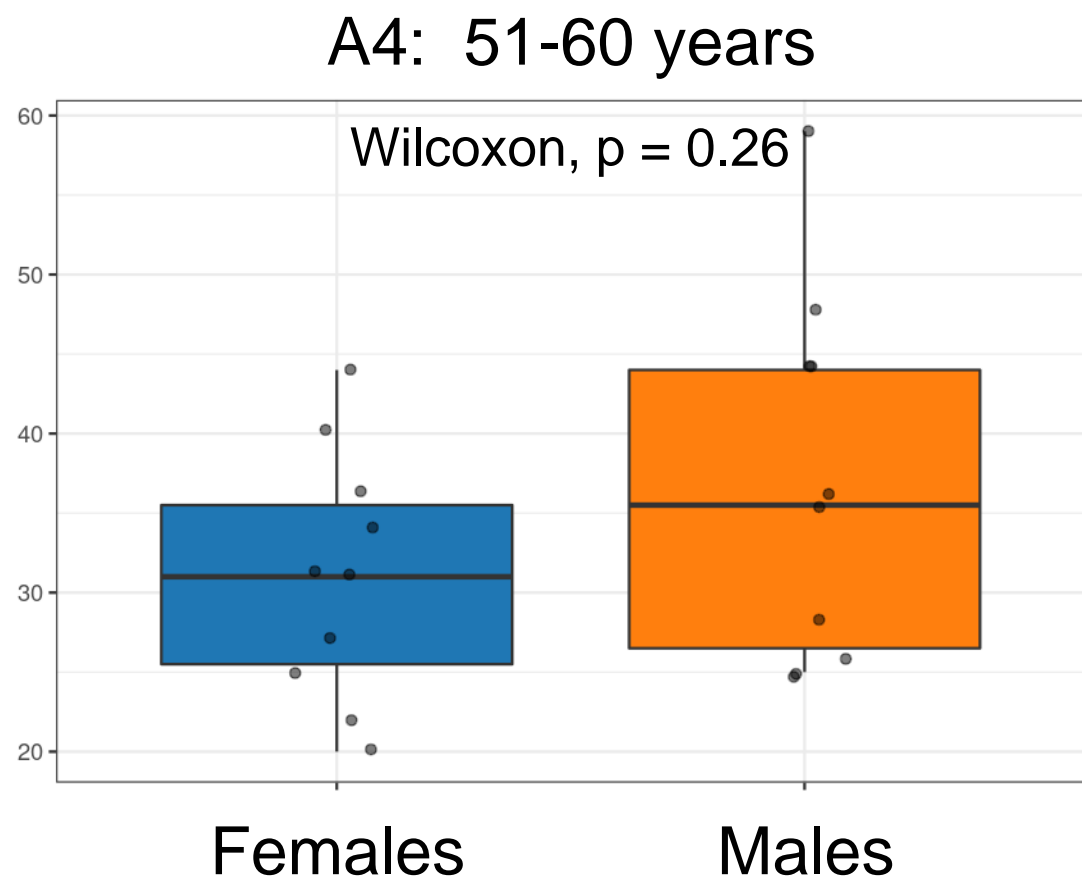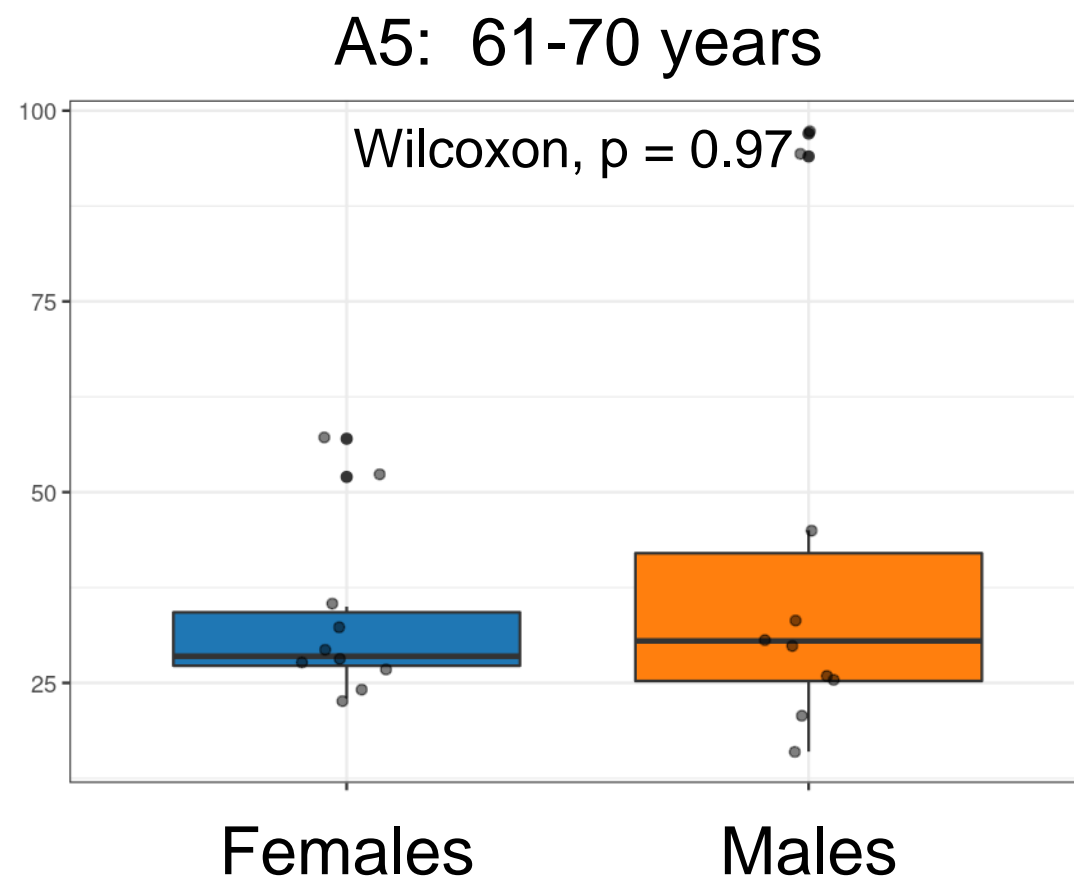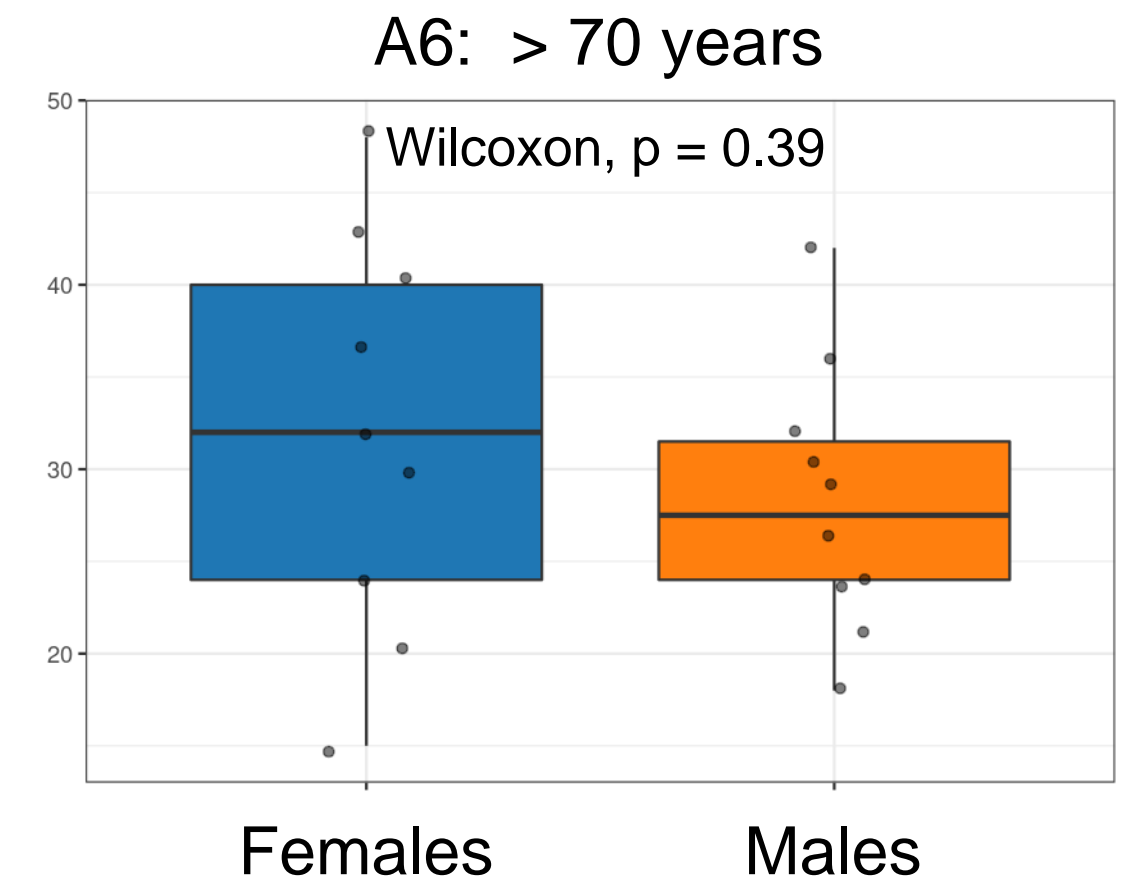

# Figure S3

## a 1-20 years

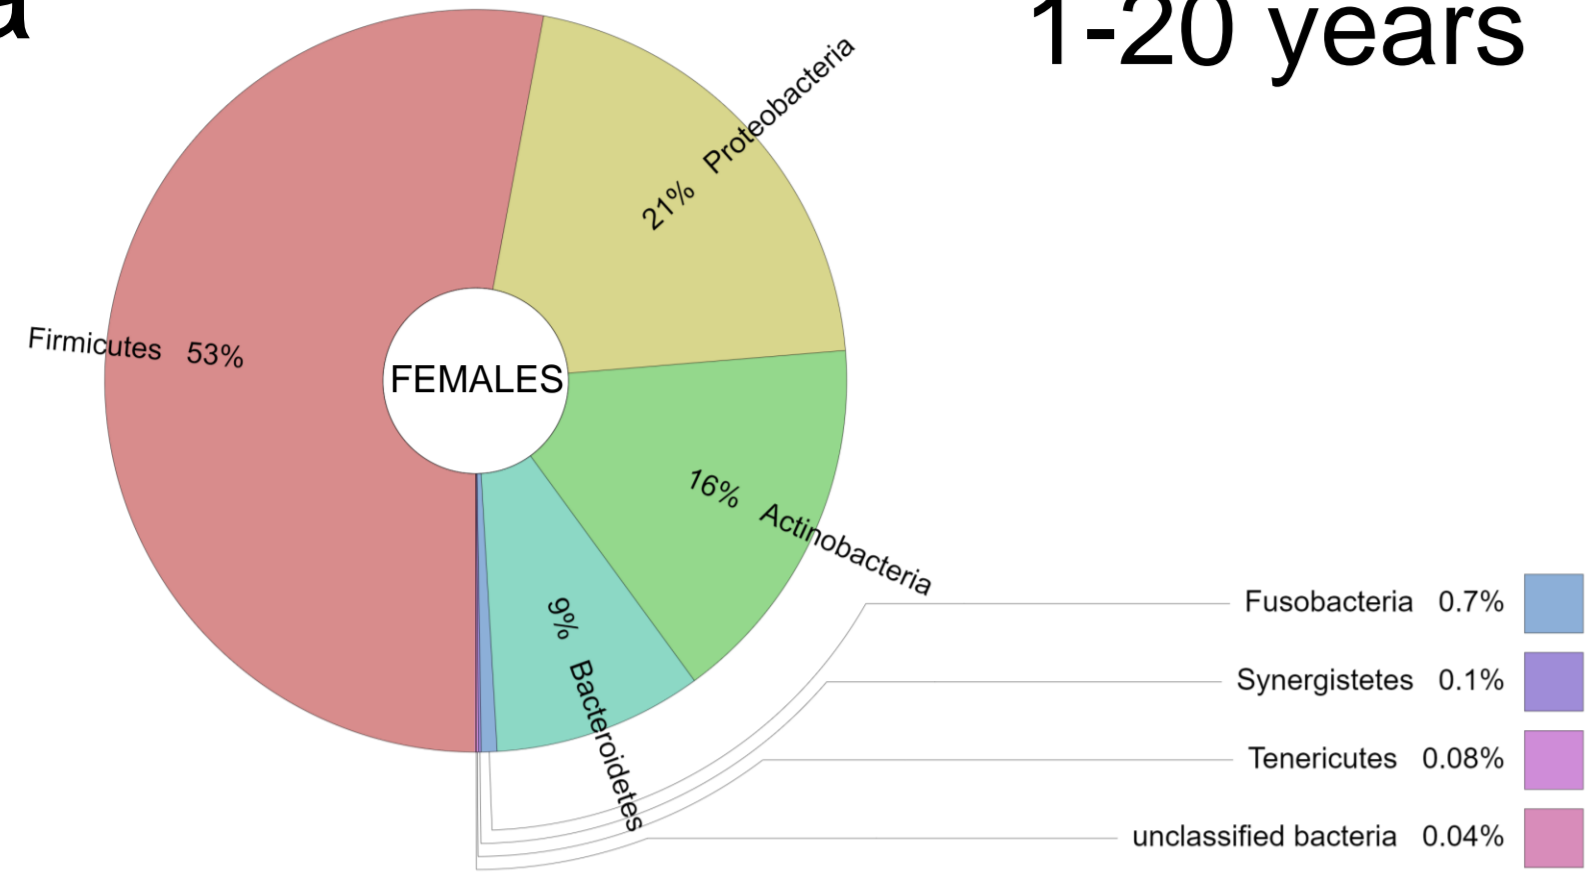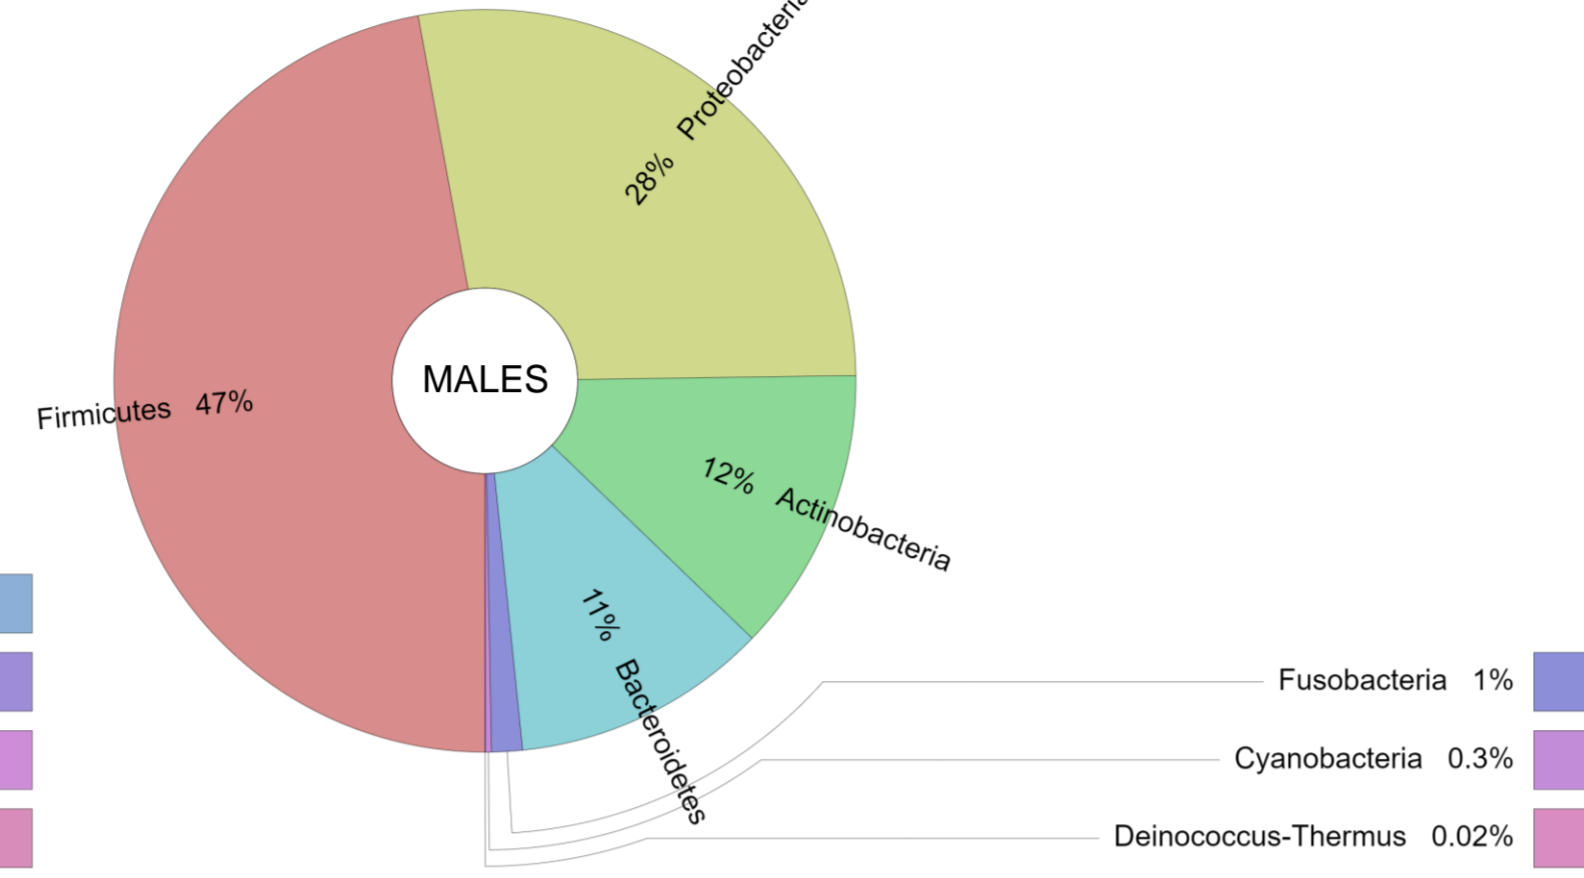

## b 21-40 years

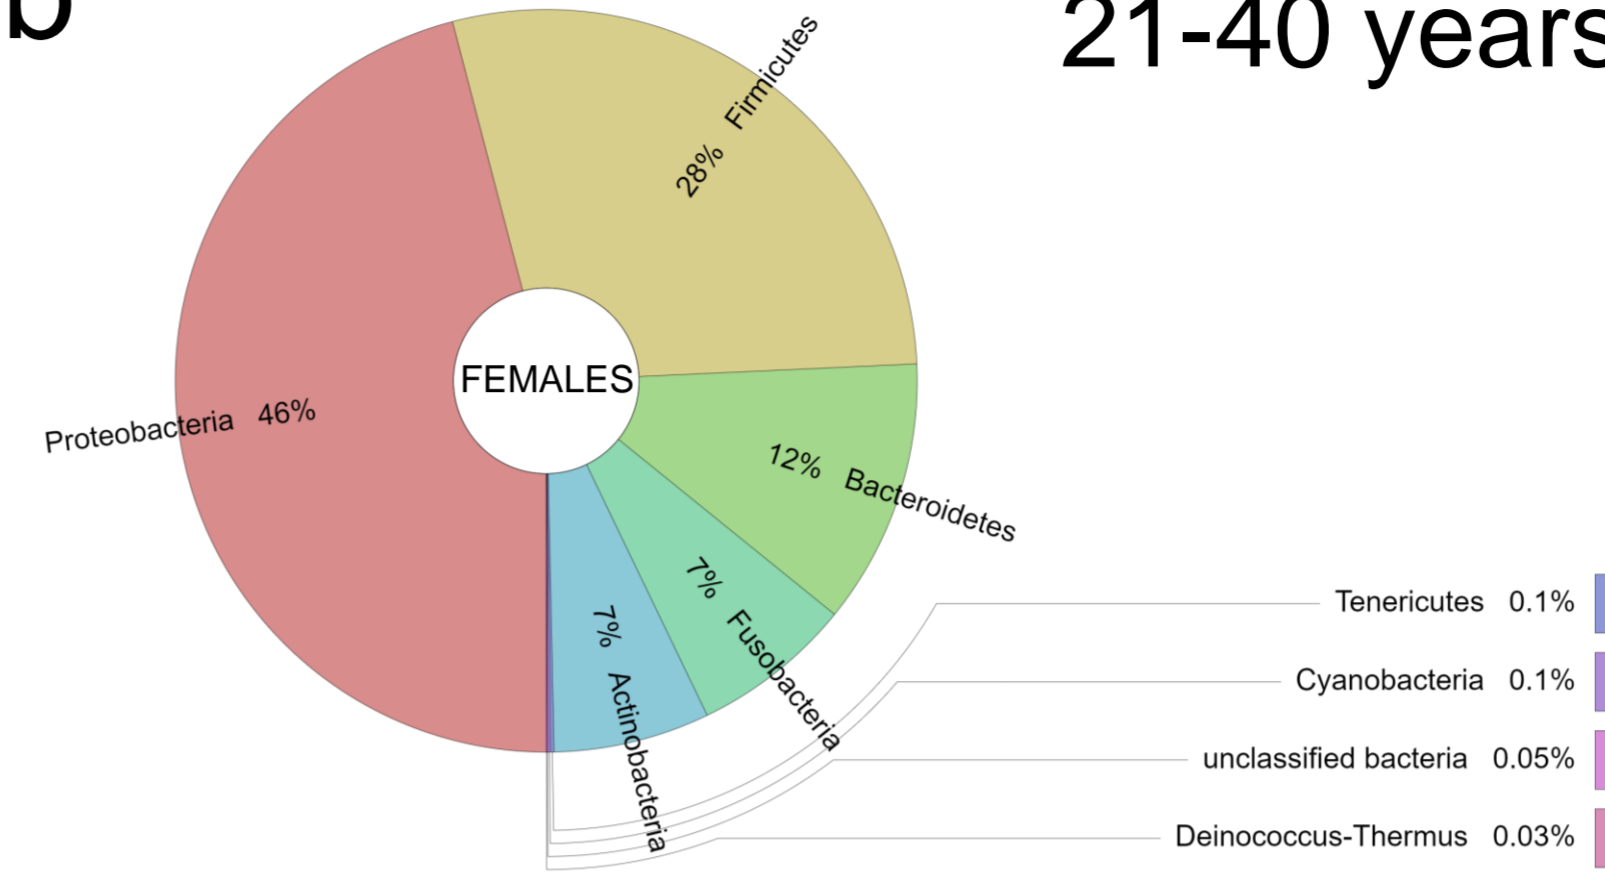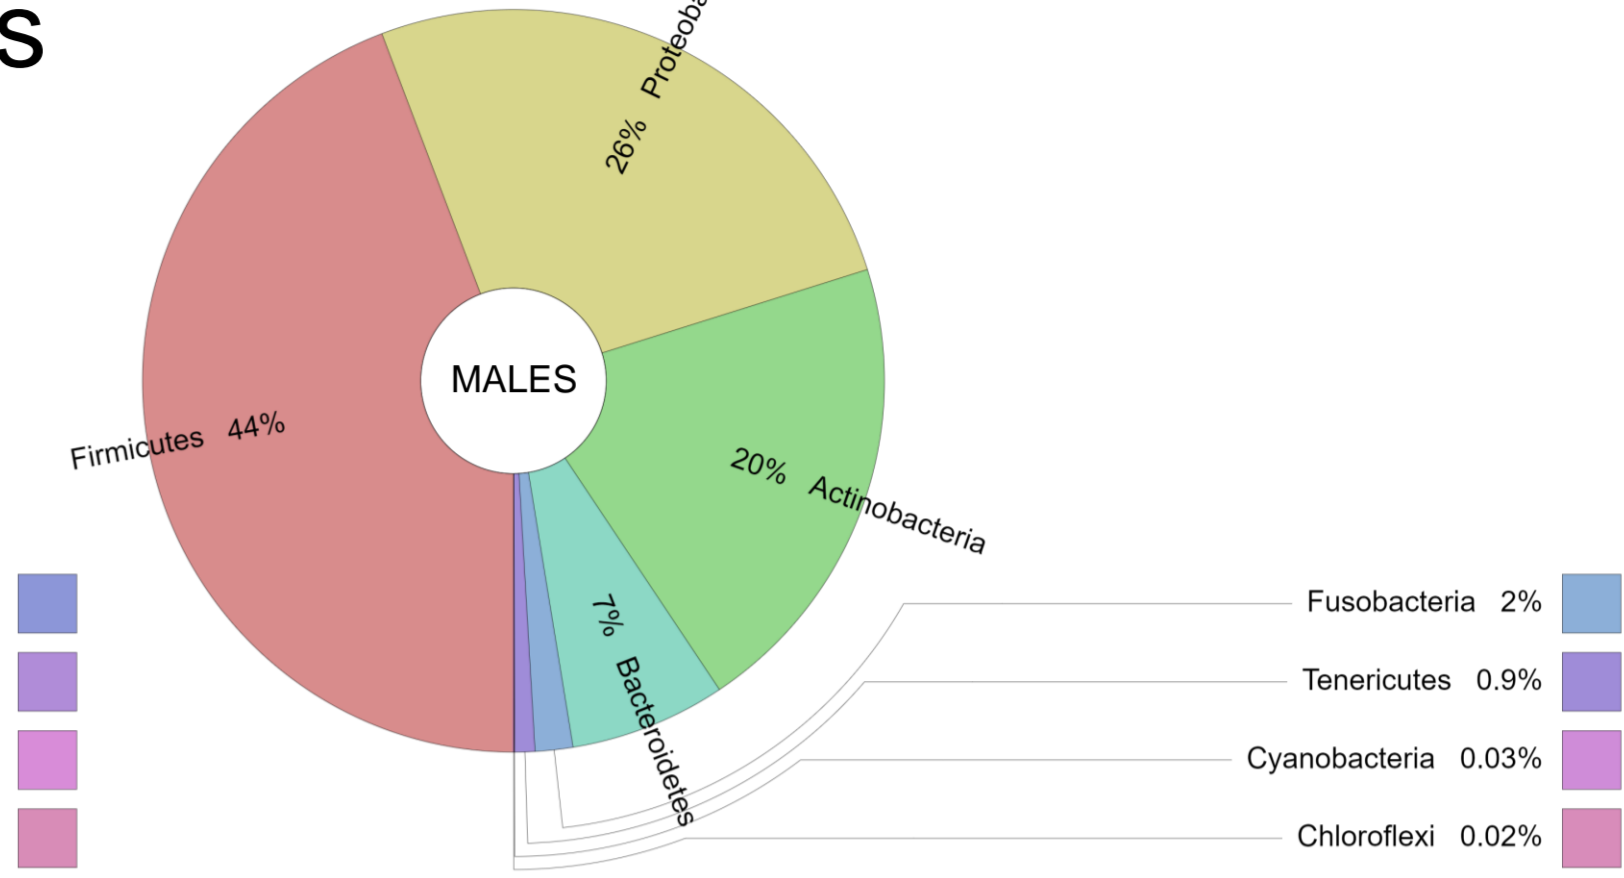

## c 41-50 years

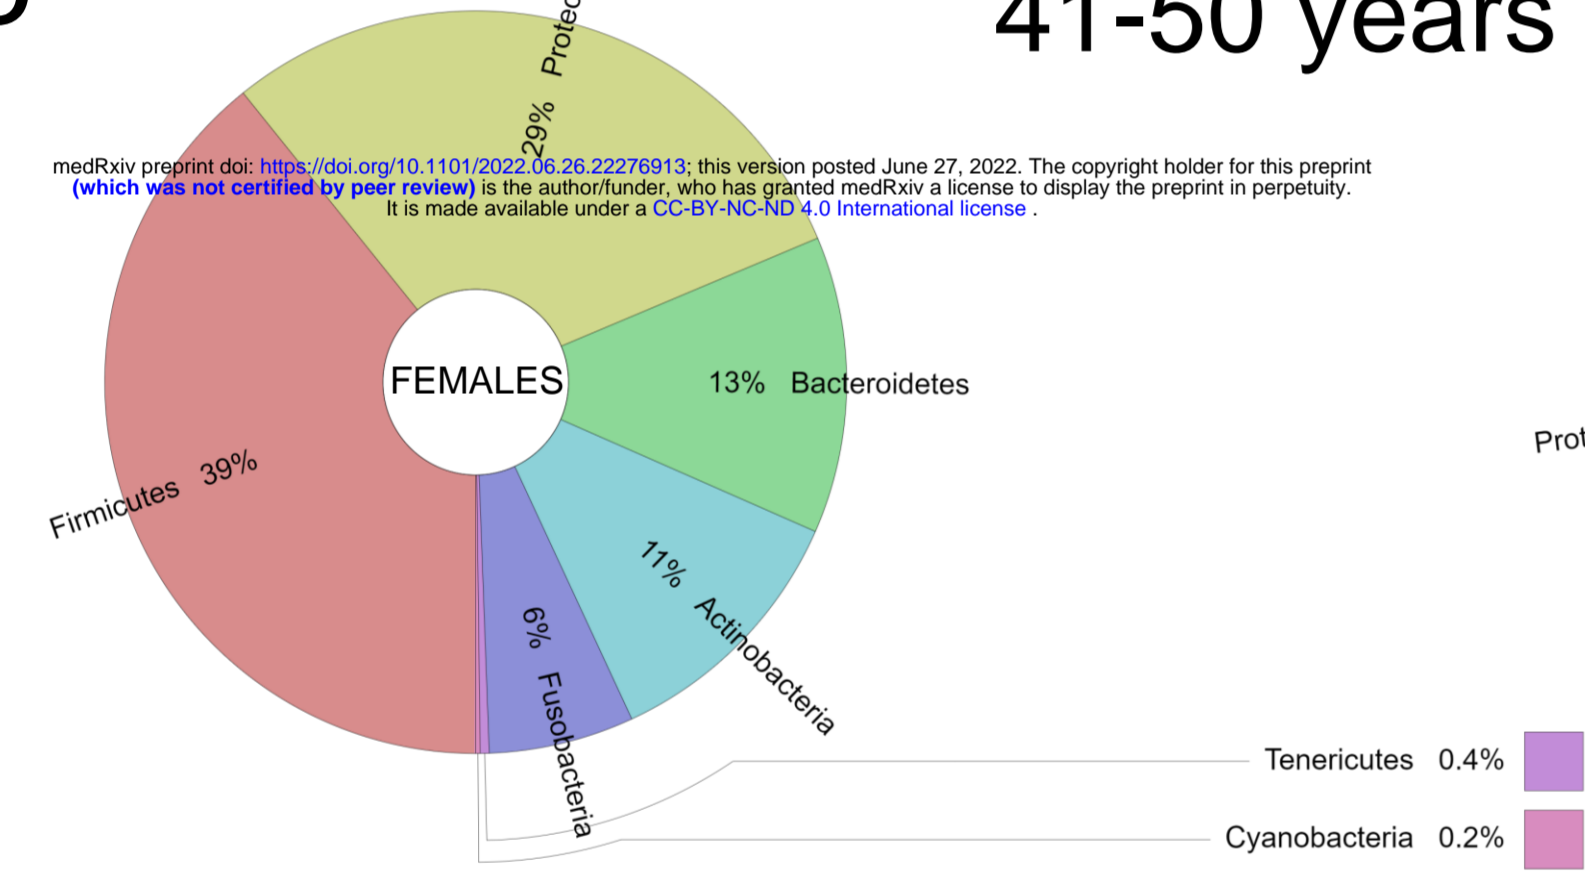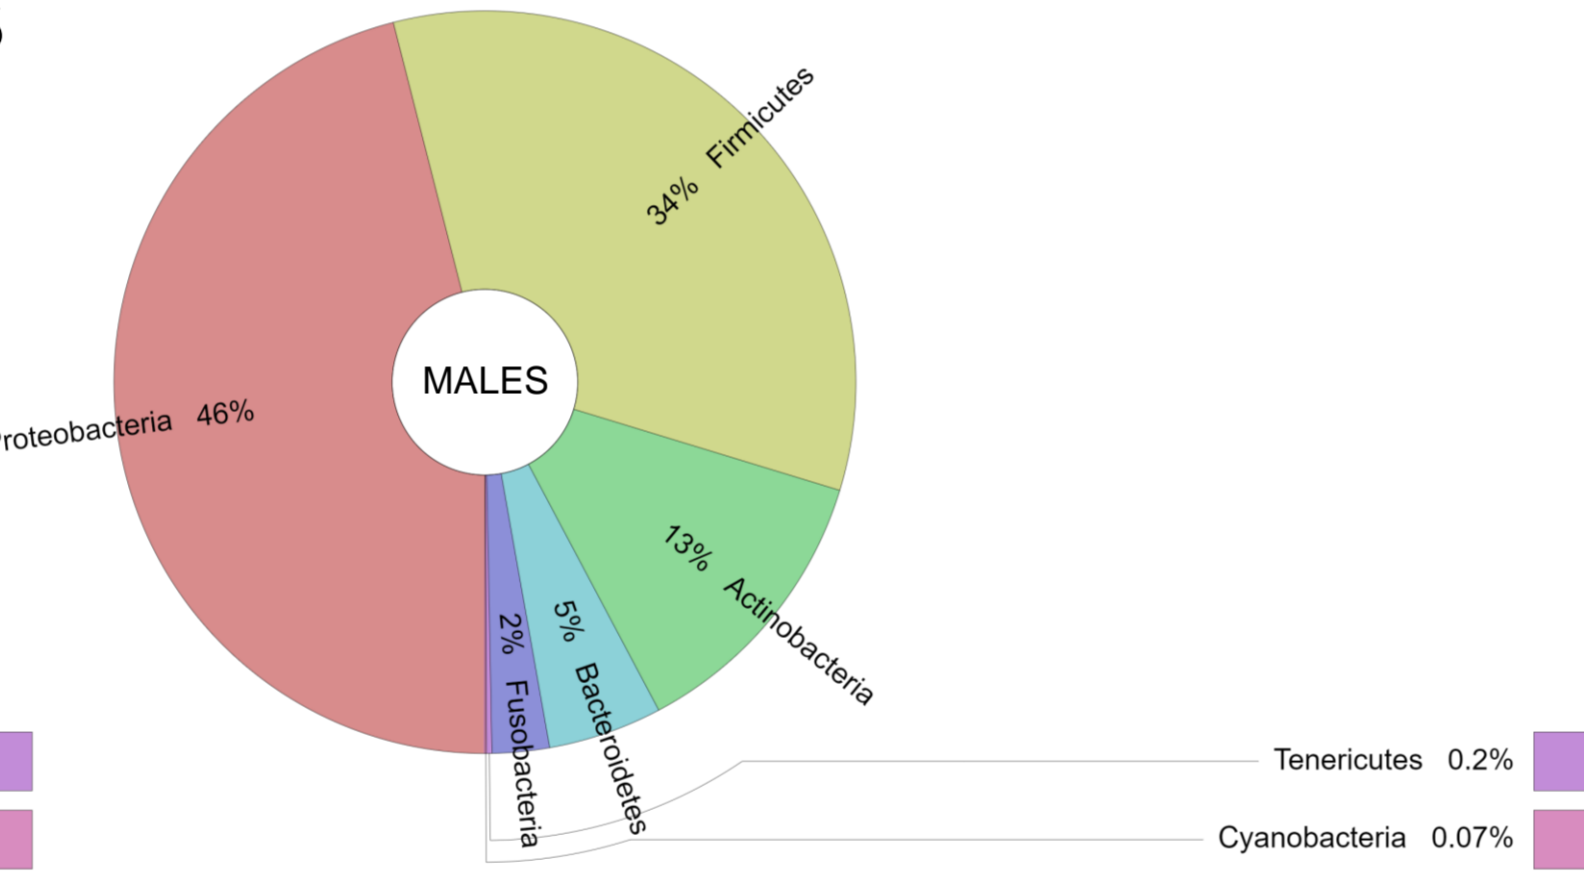

## d 51-60 years

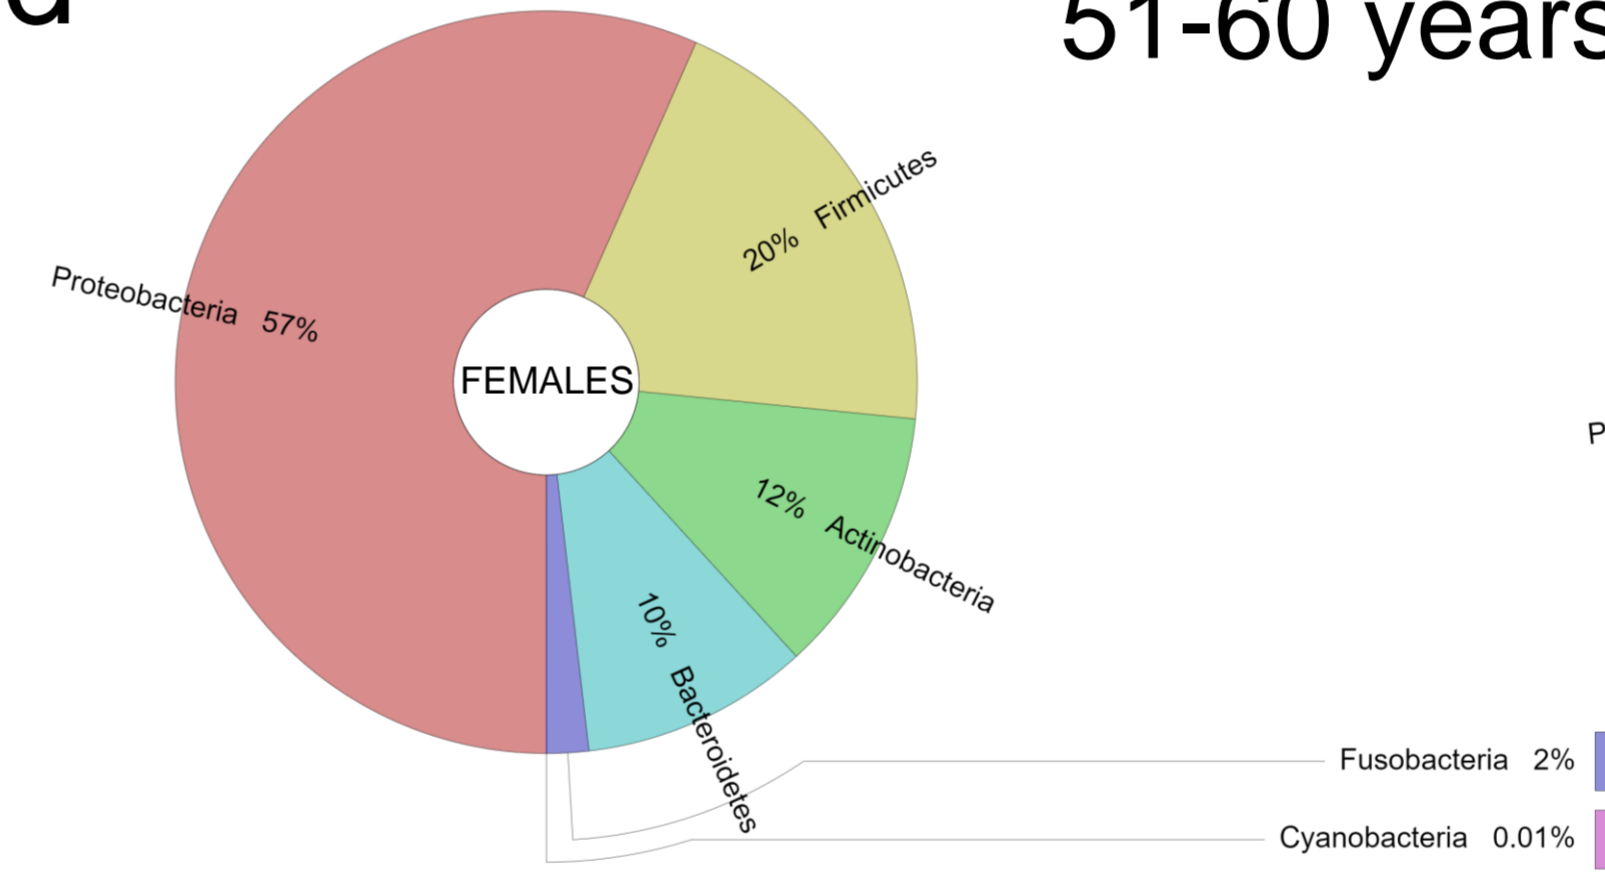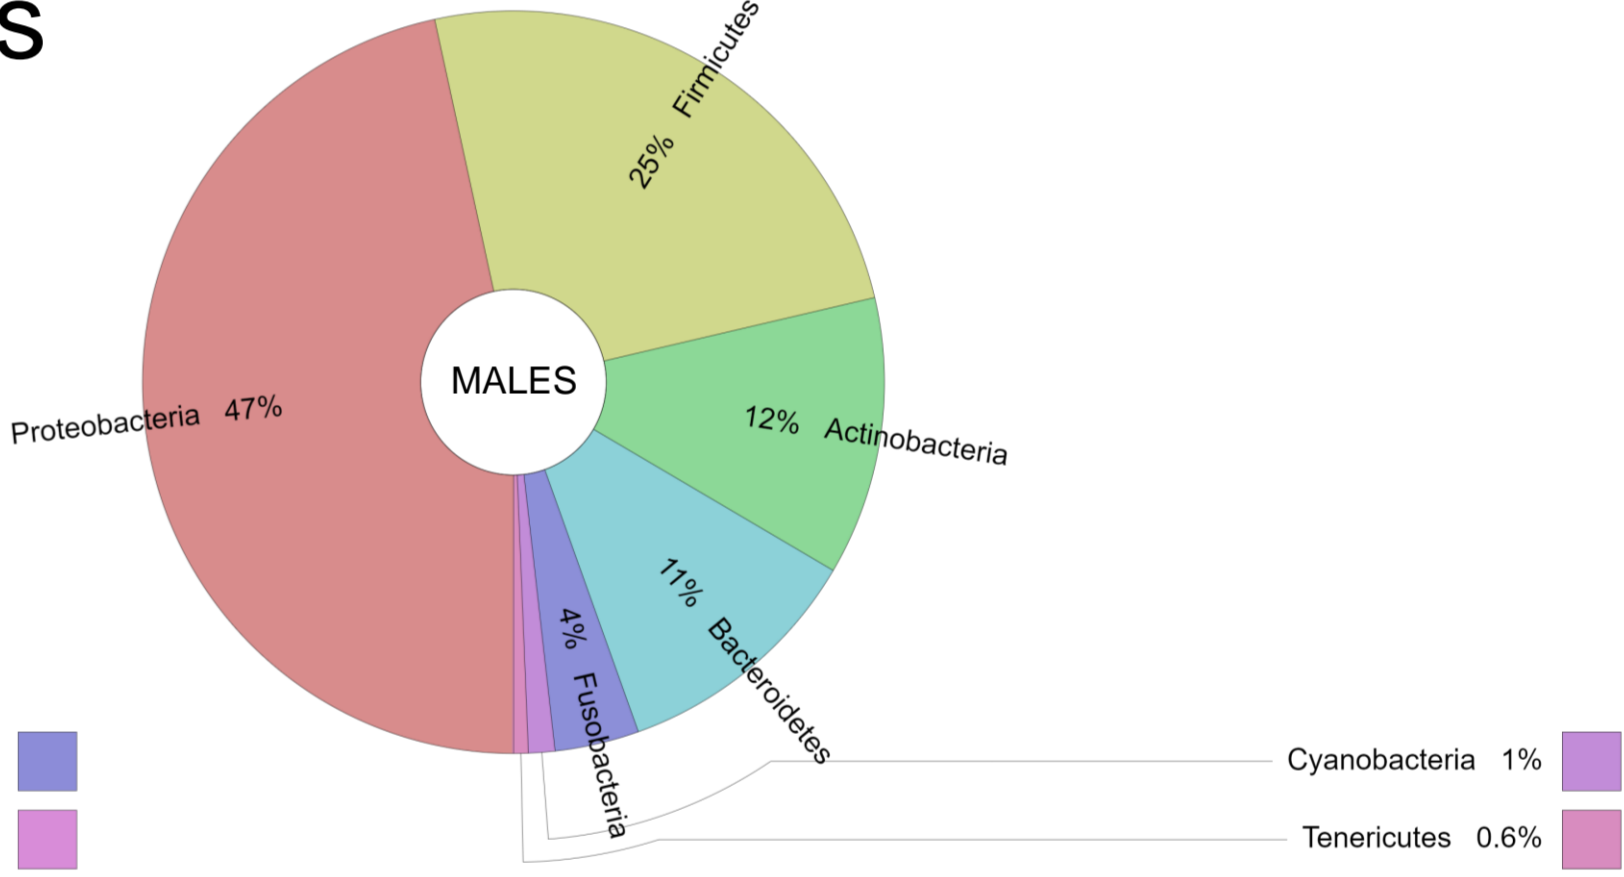

## e 61-70 years

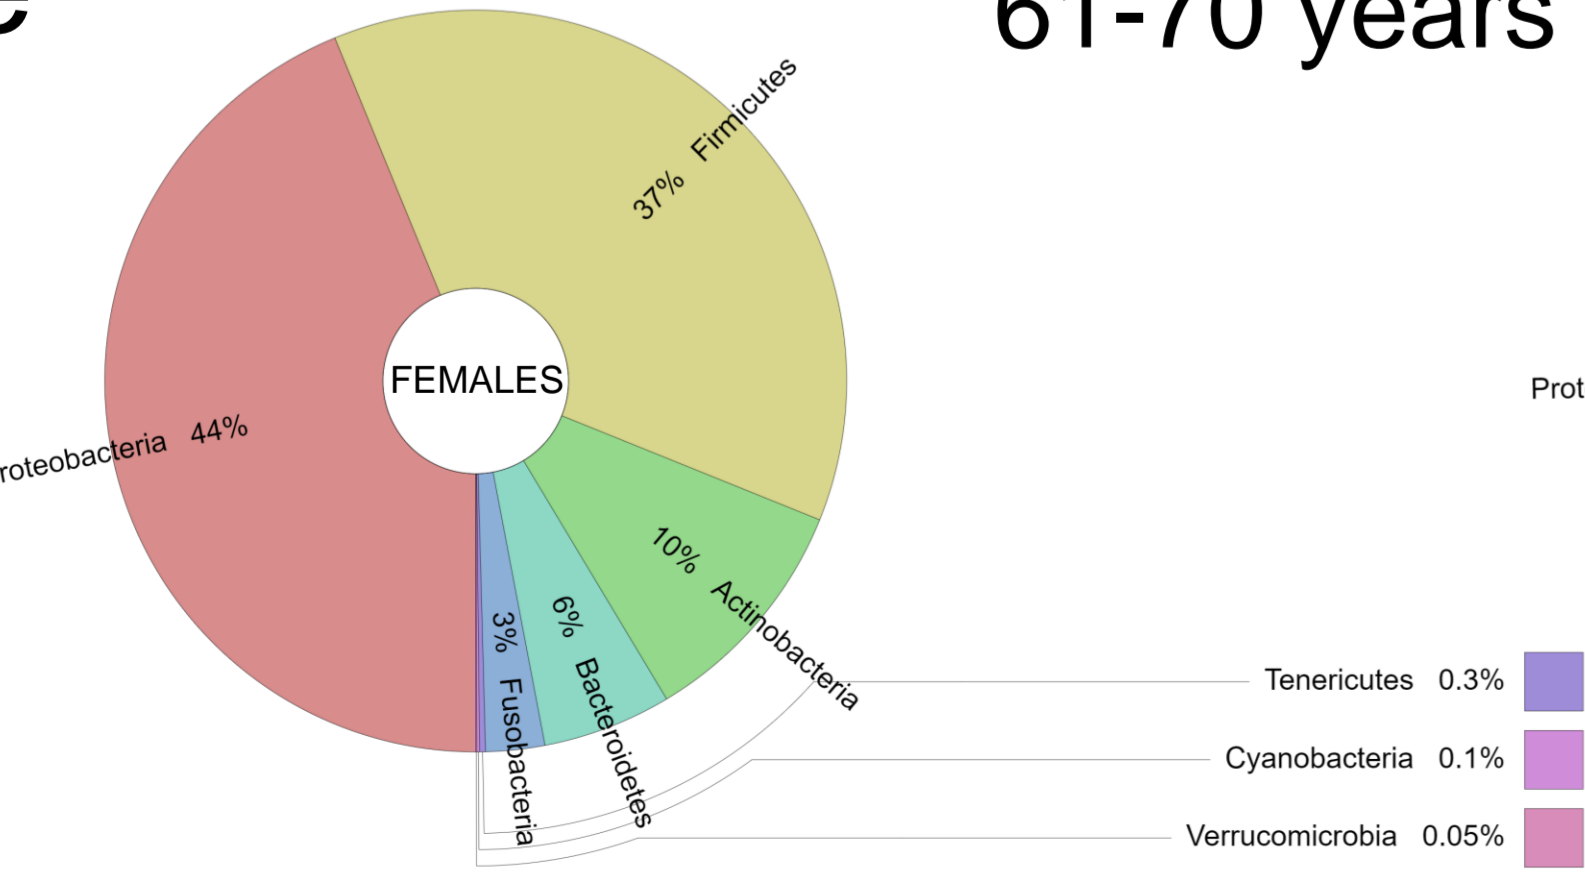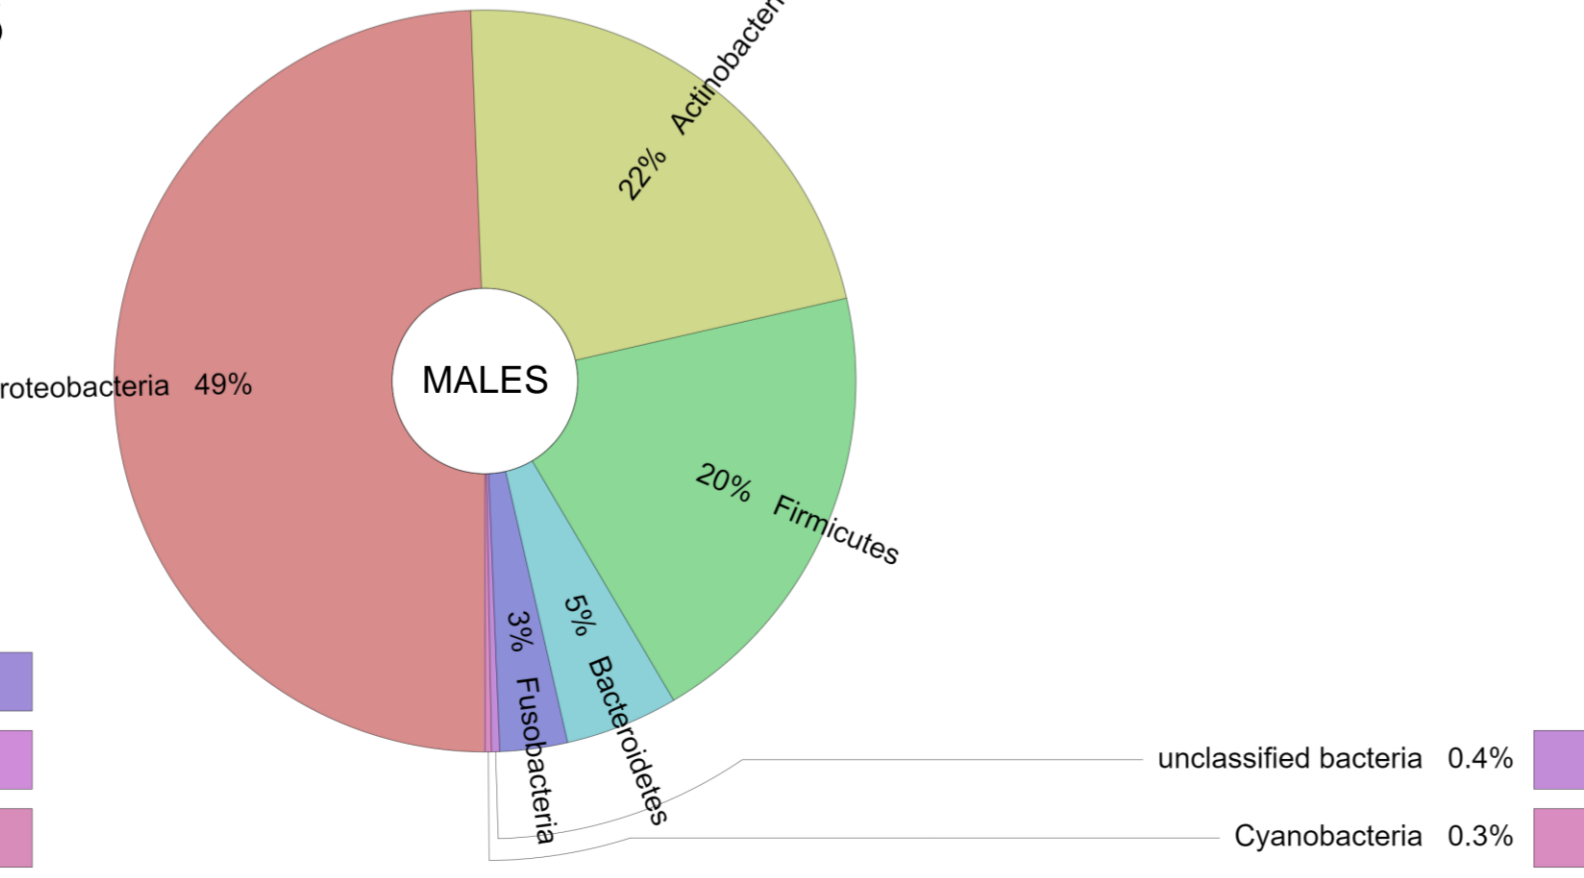

## f > 70 years

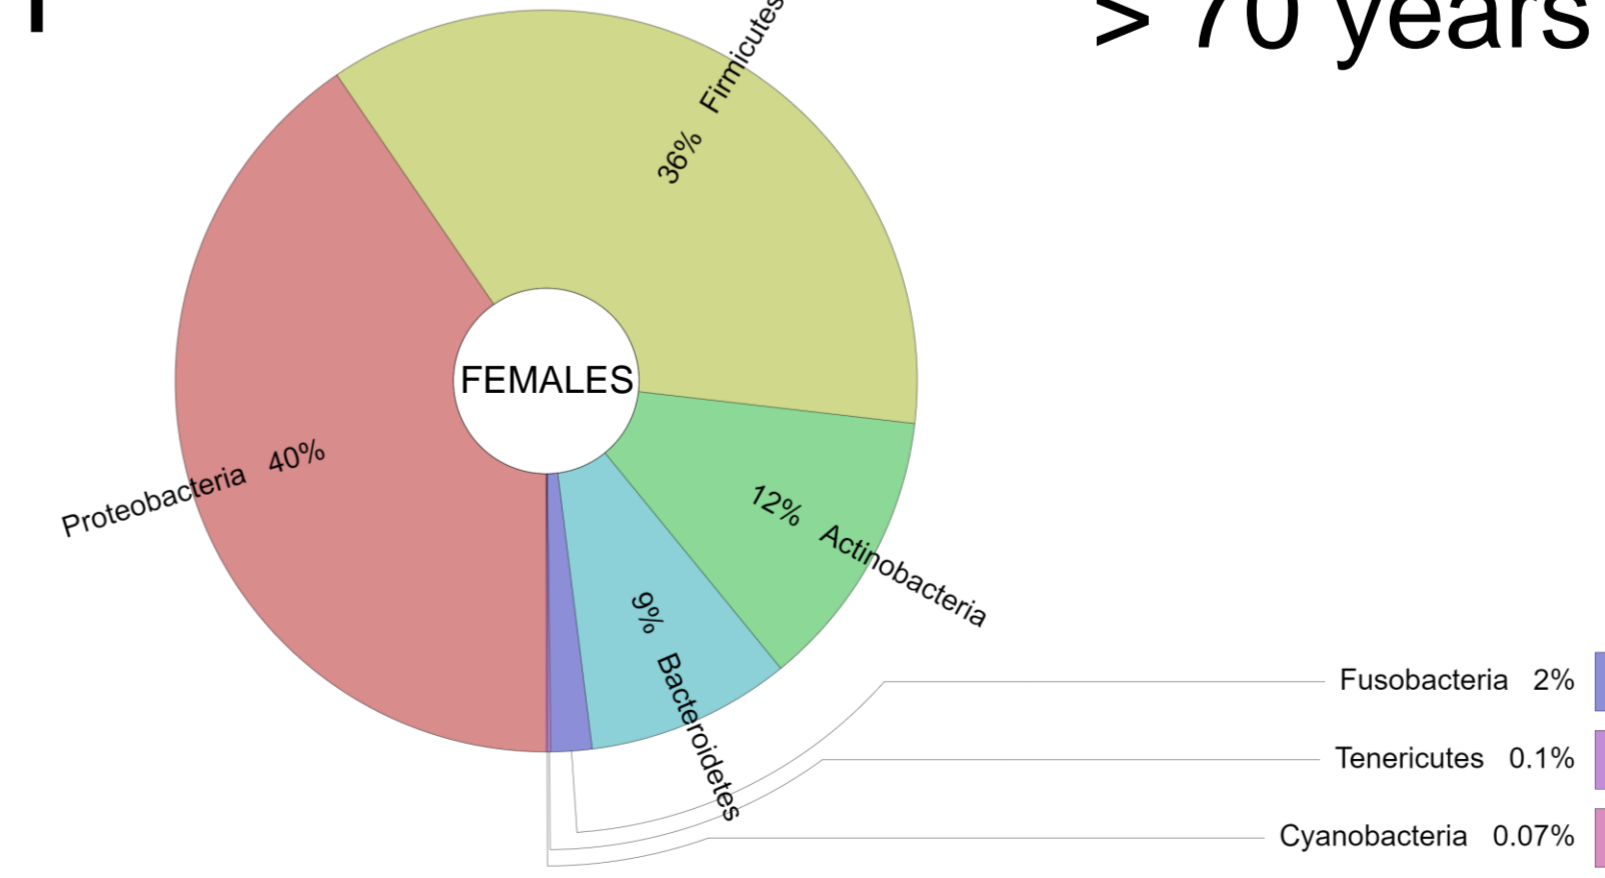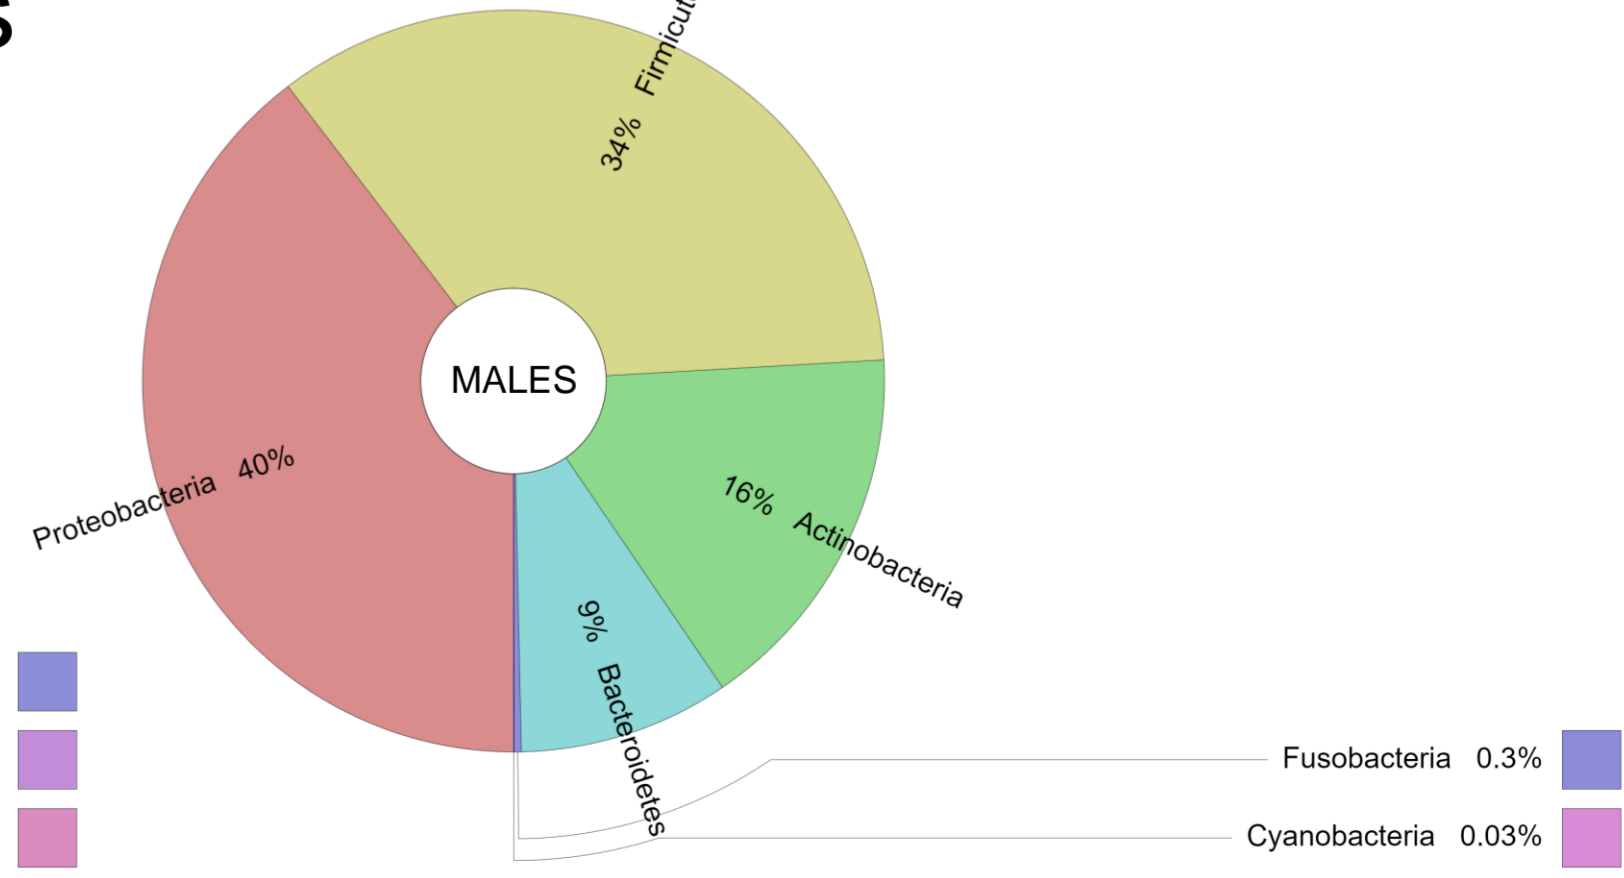



# Figure S4

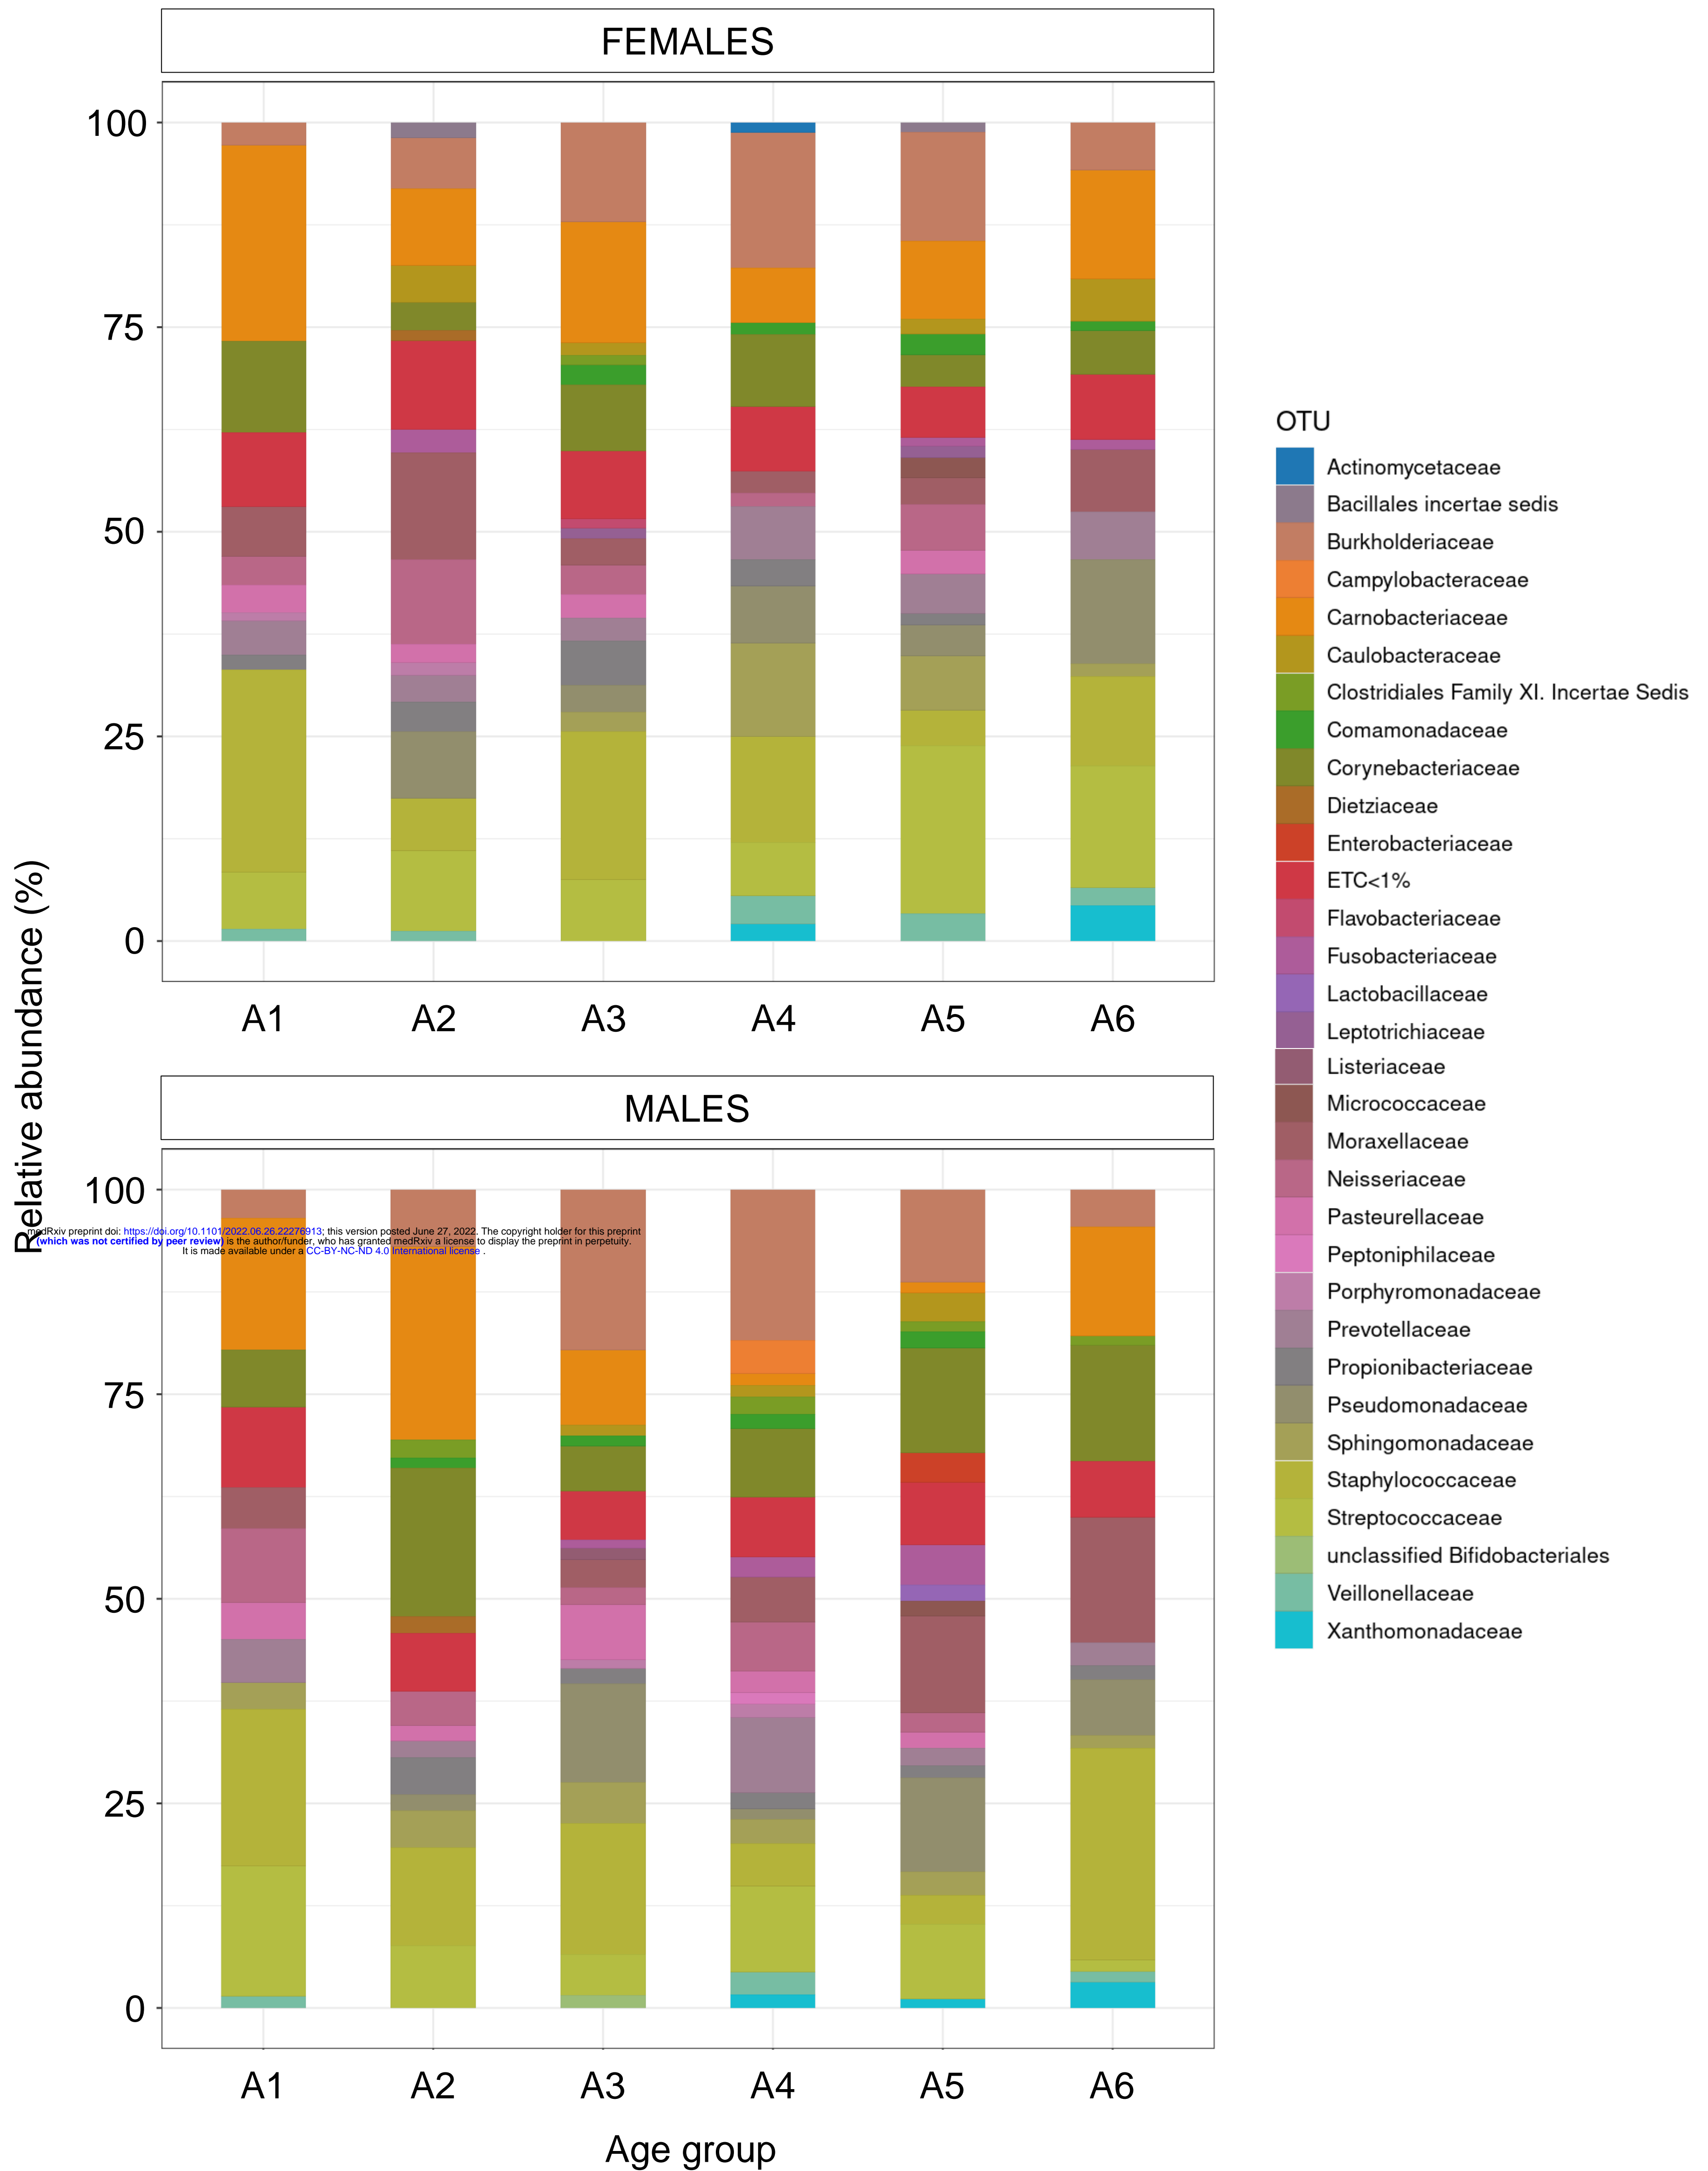



# Figure S5

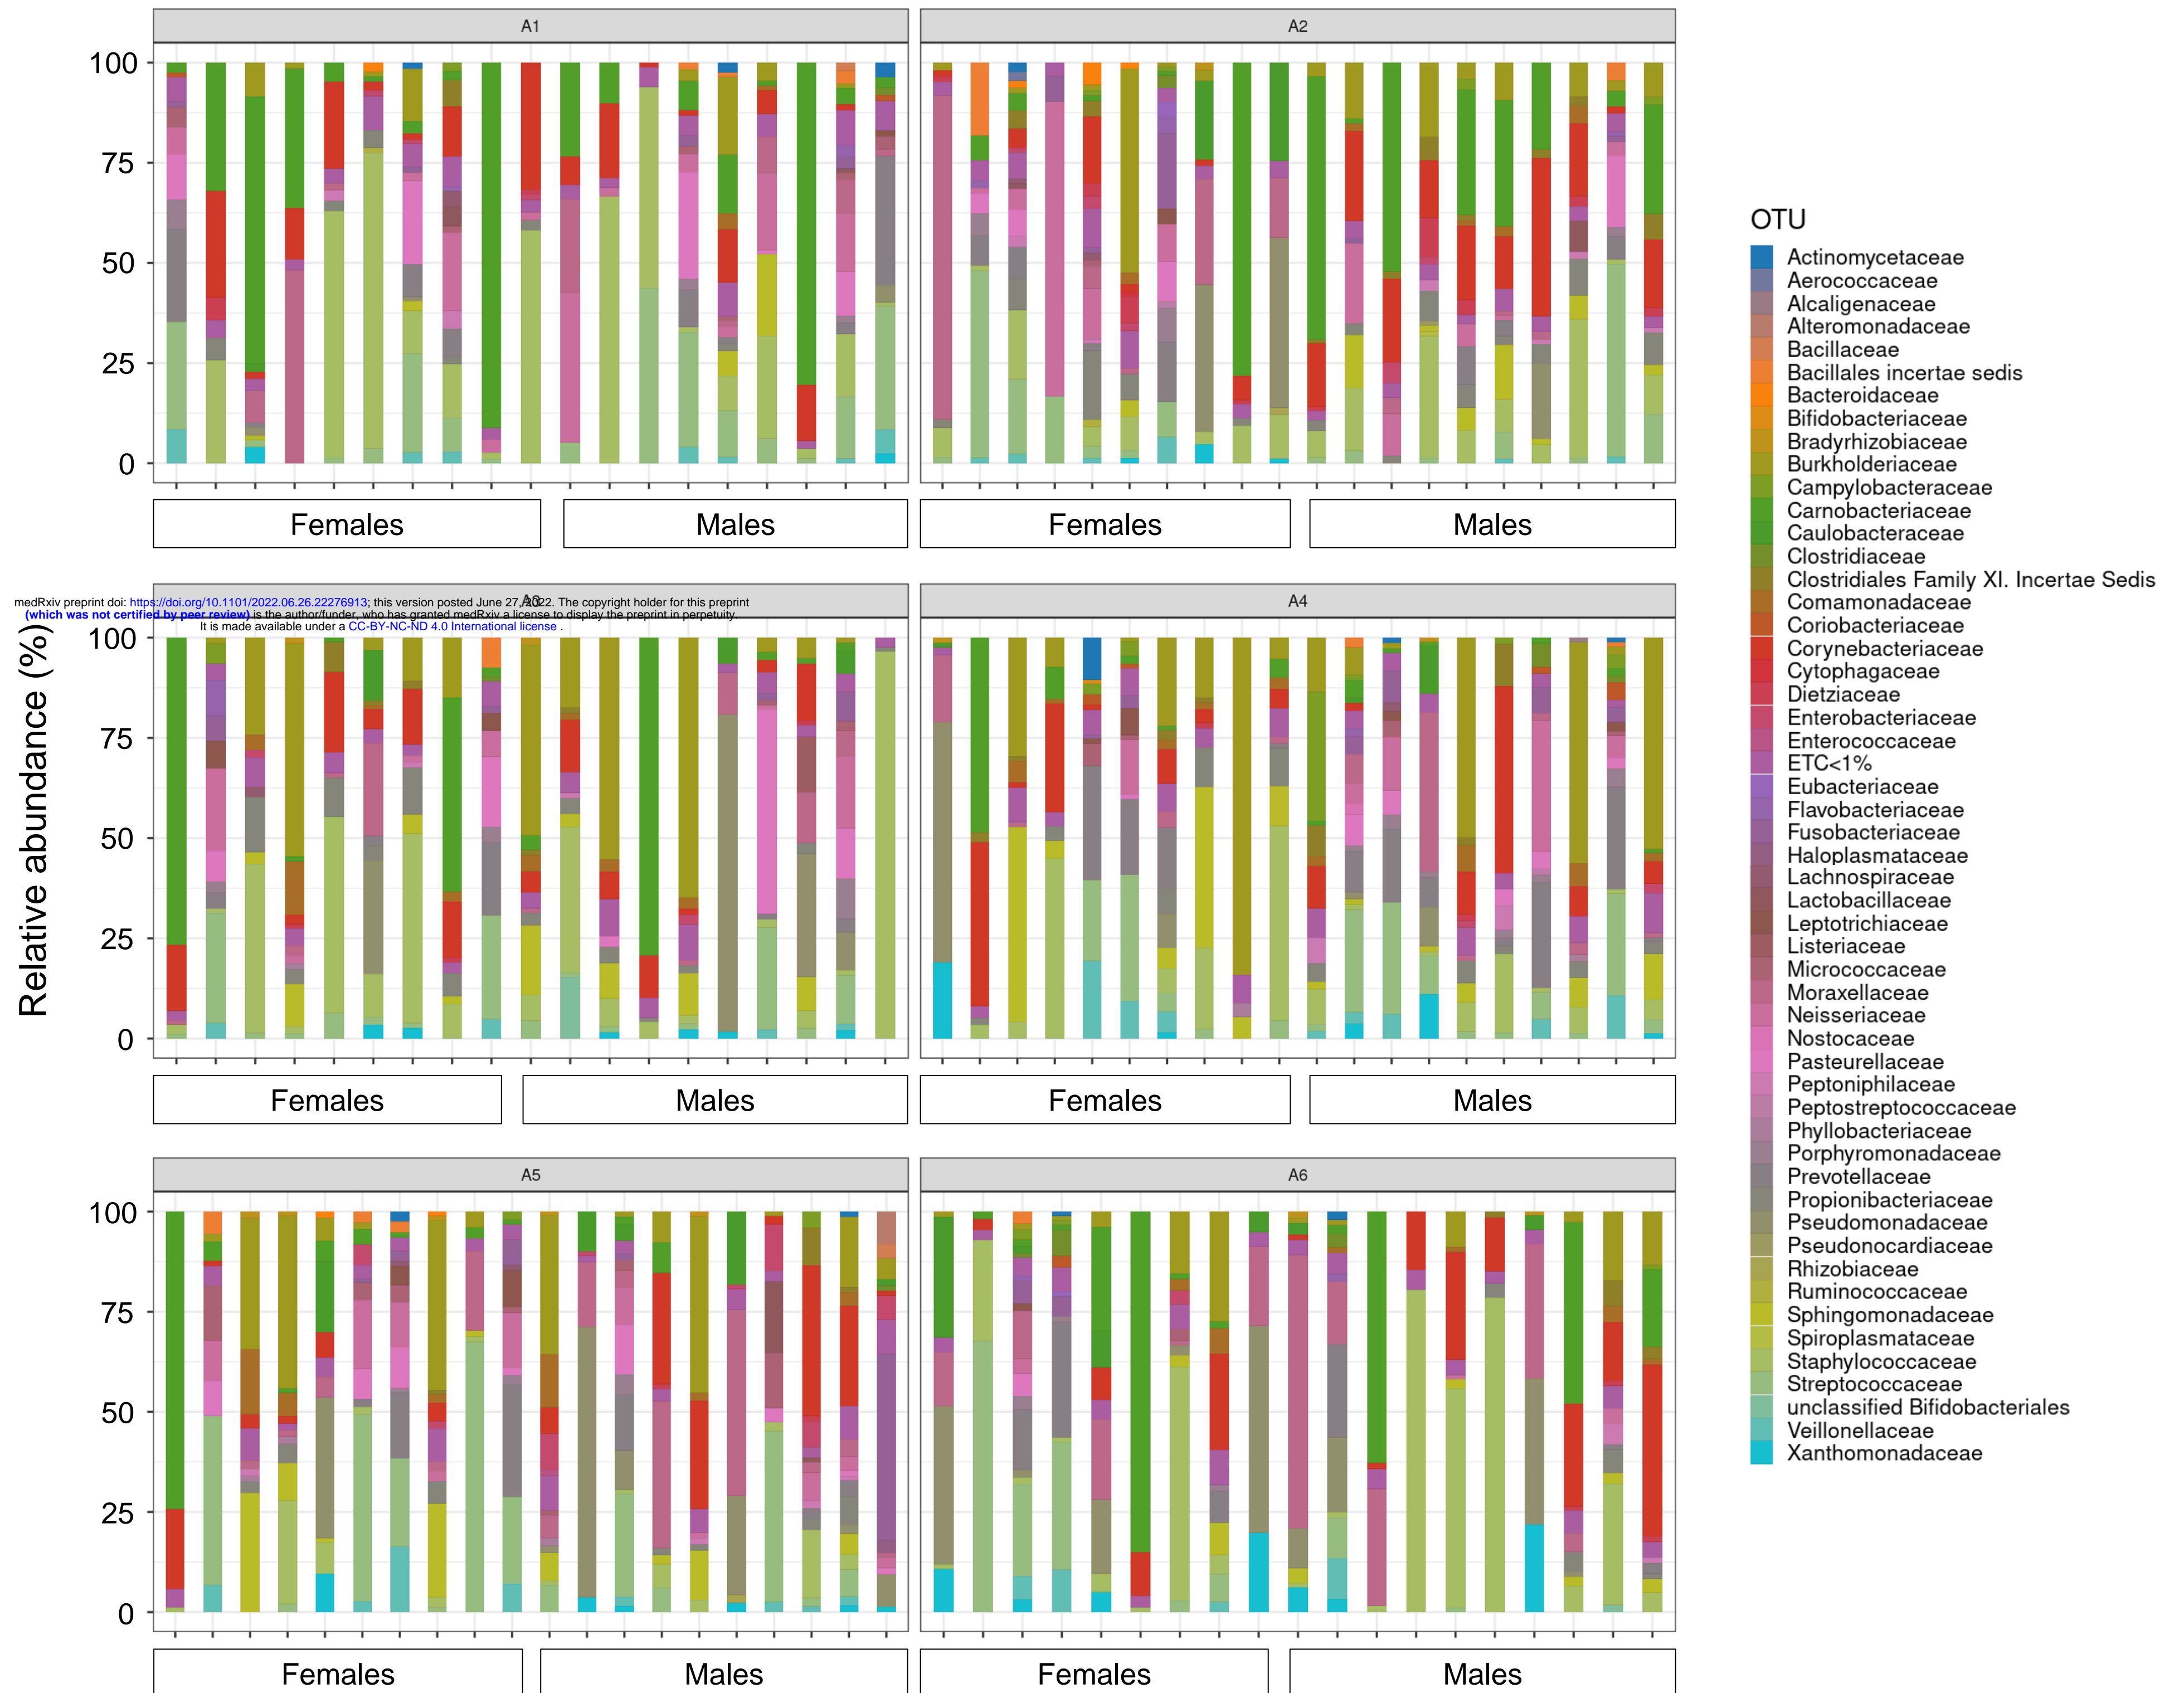

# Figure S6

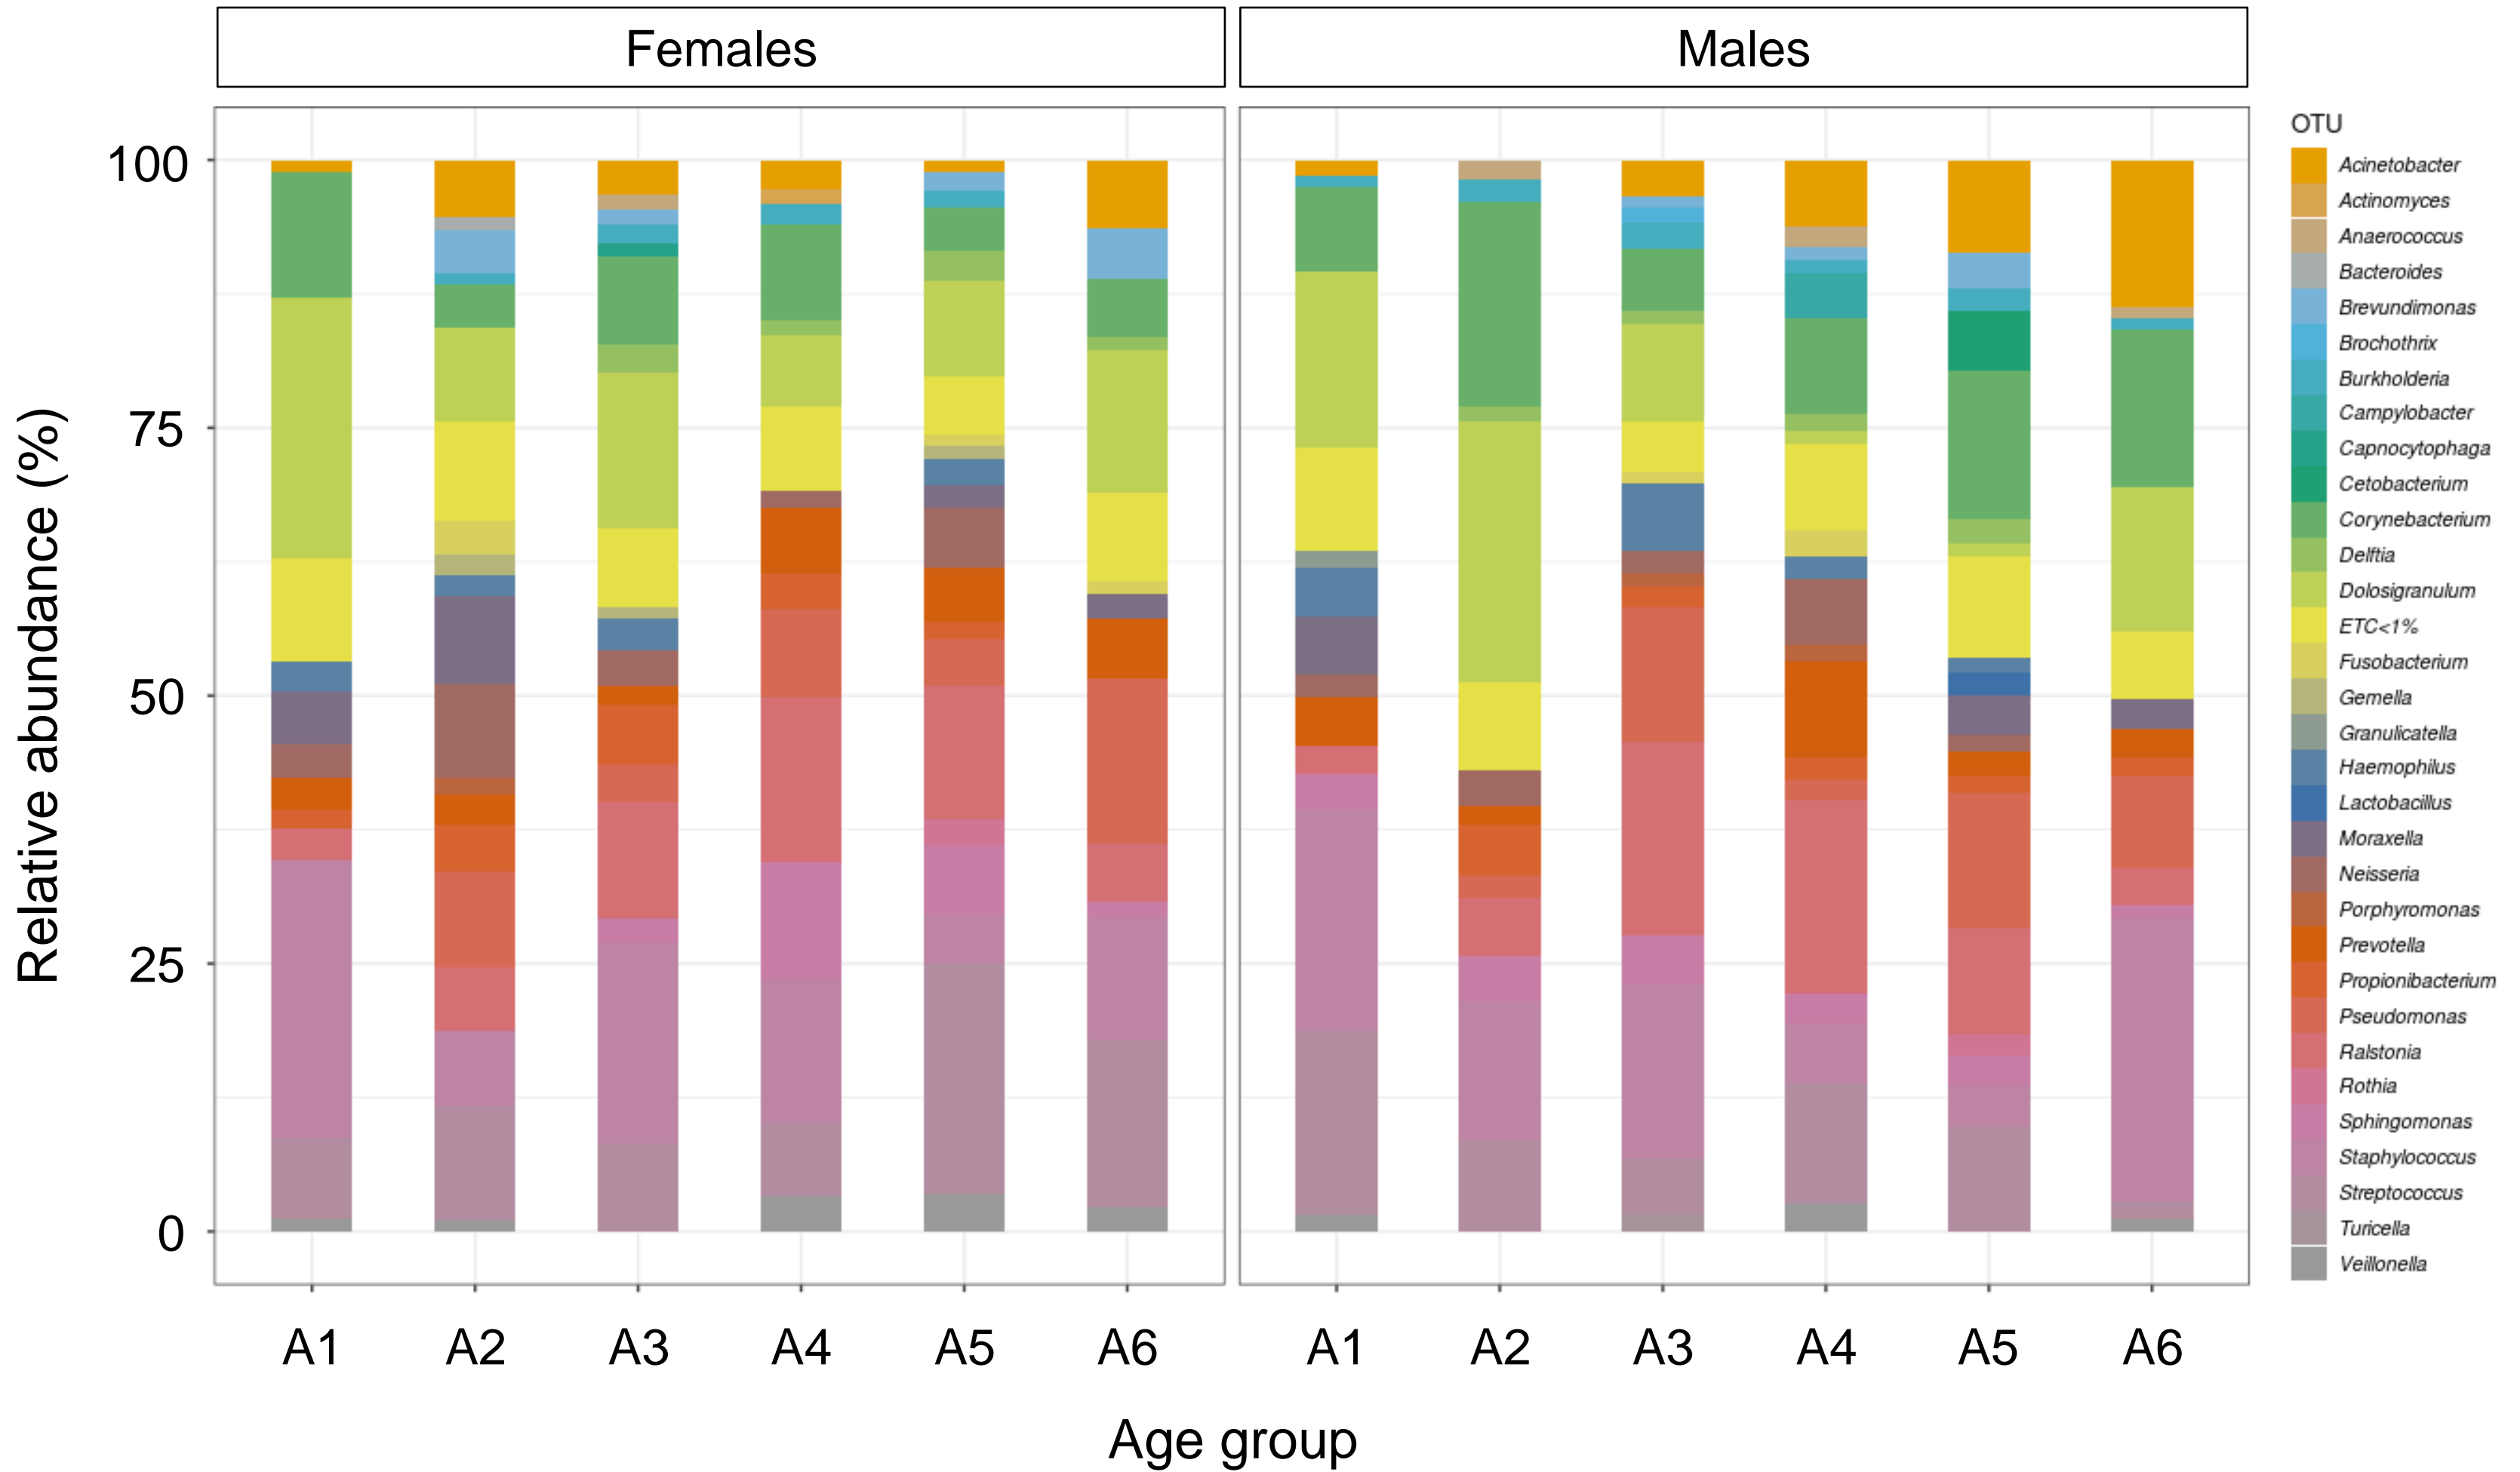

# Figure S7

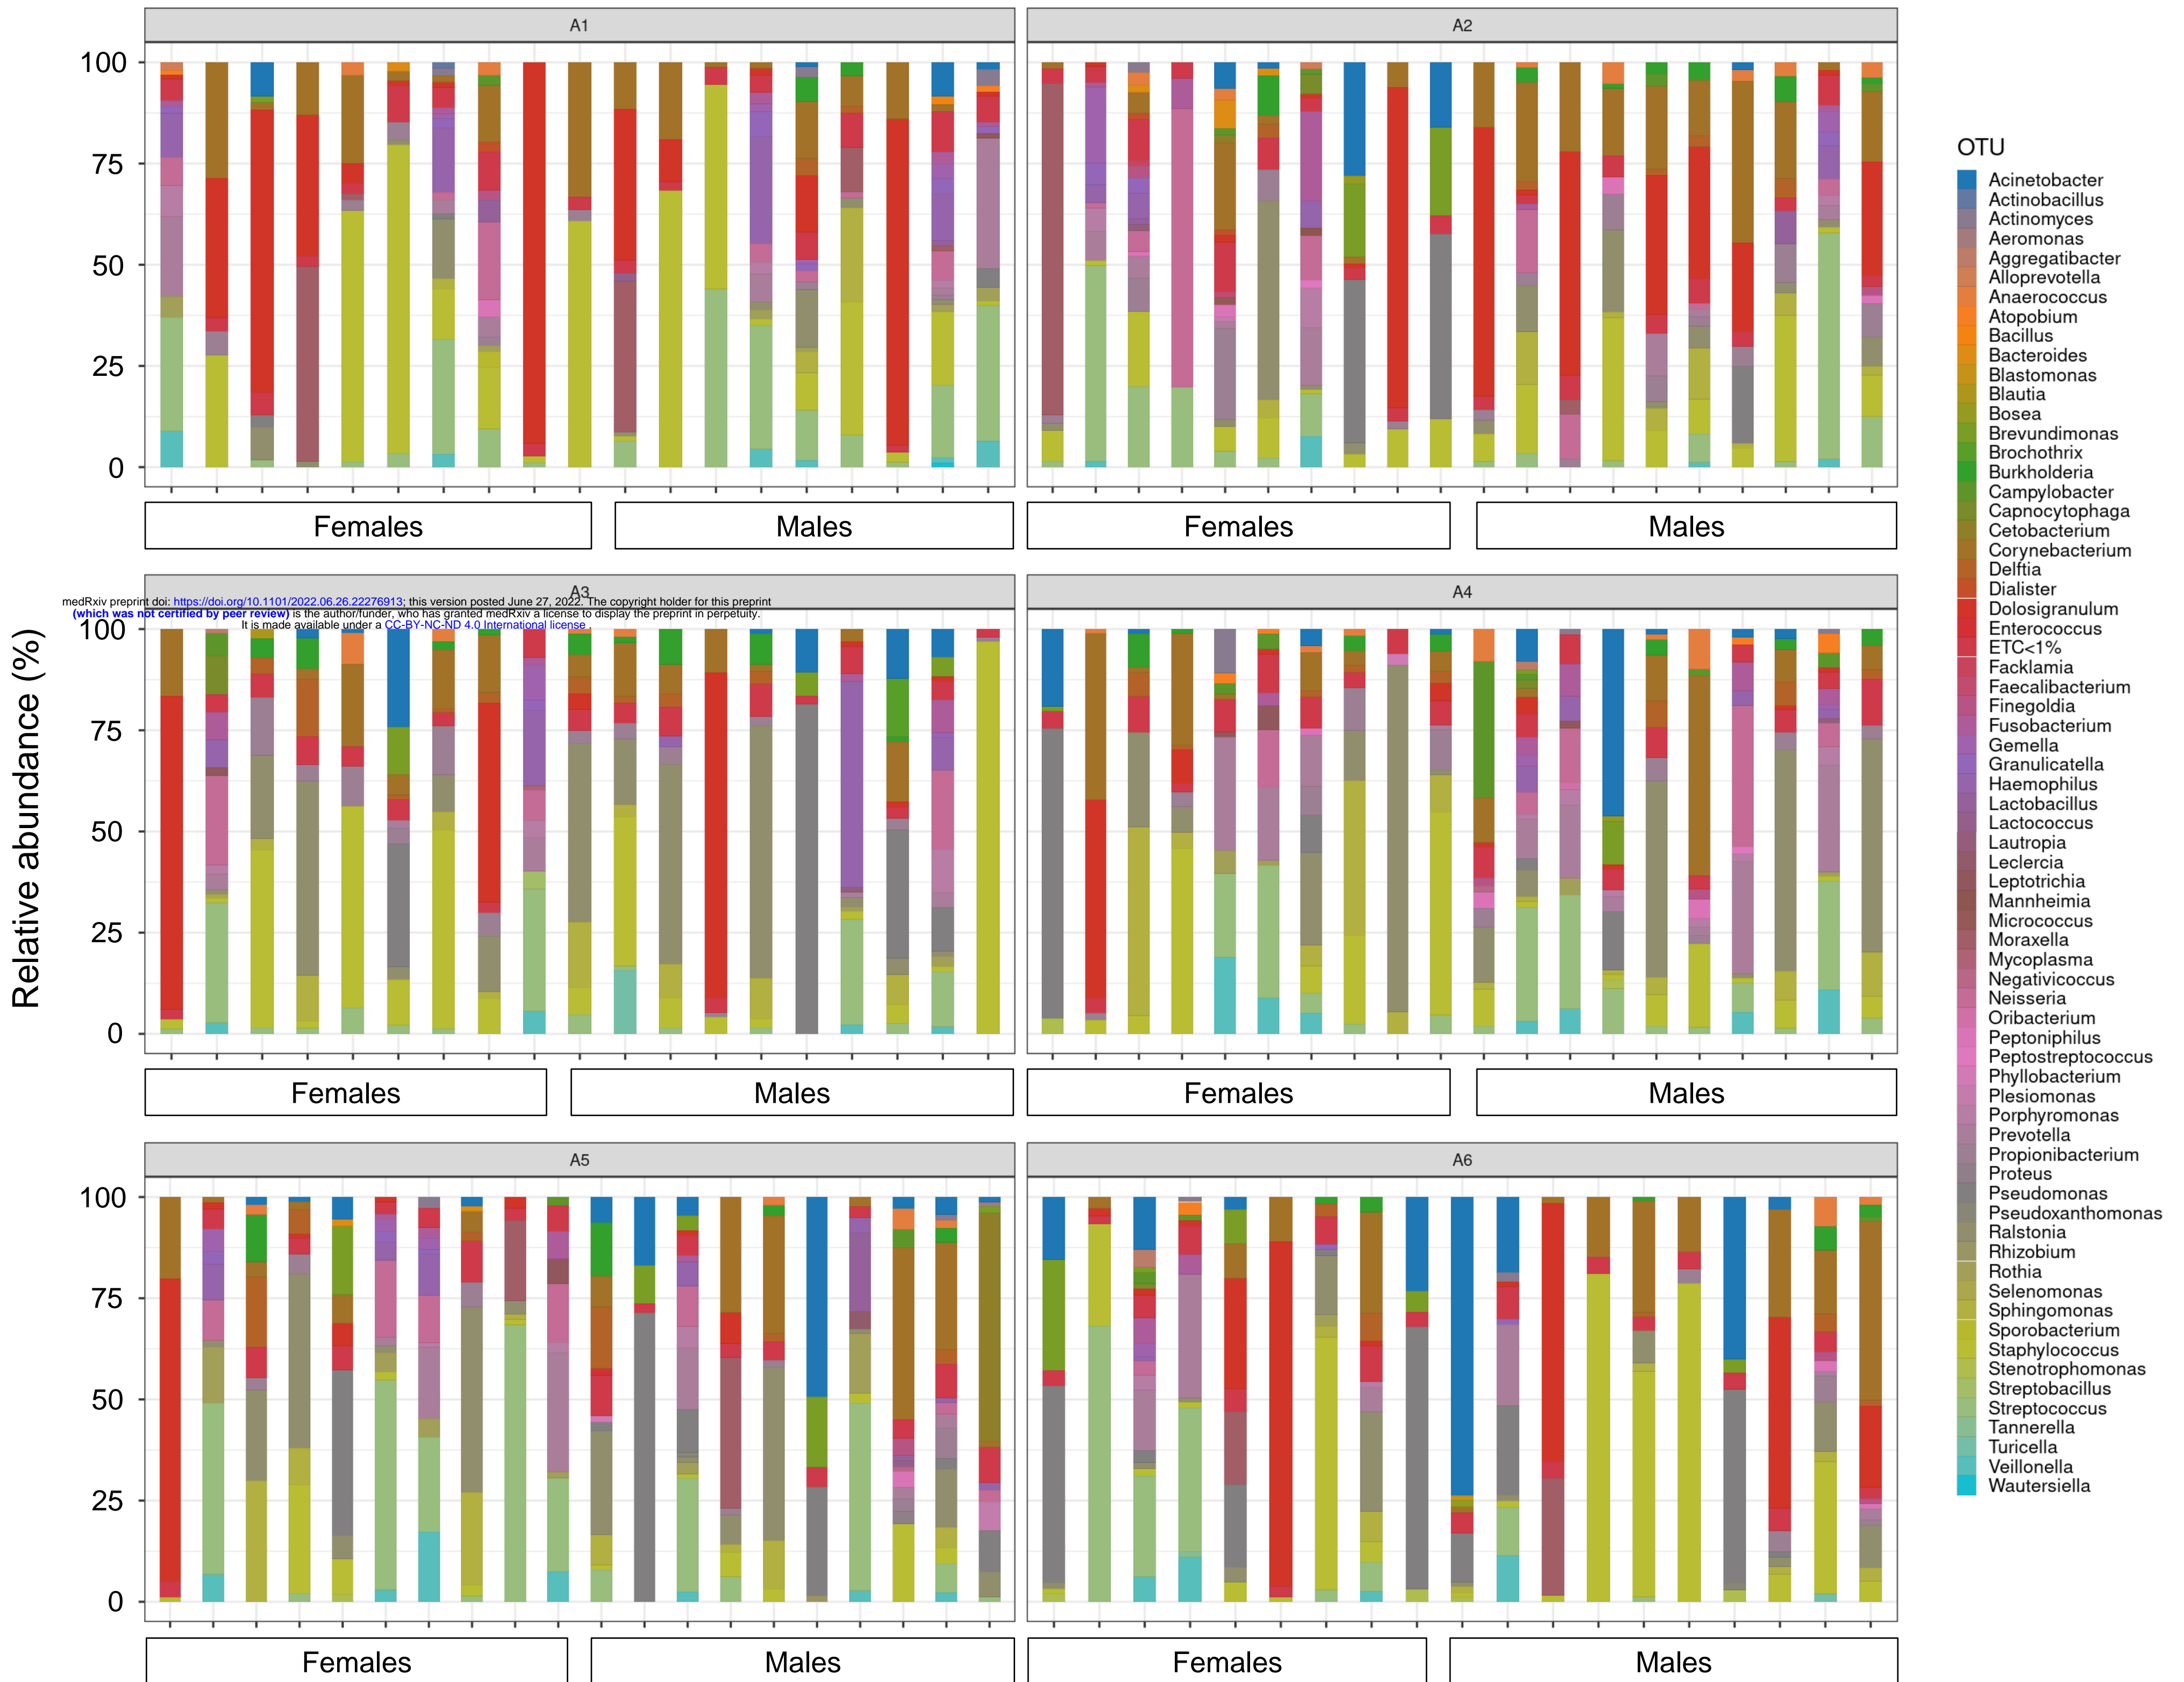

# Figure S8

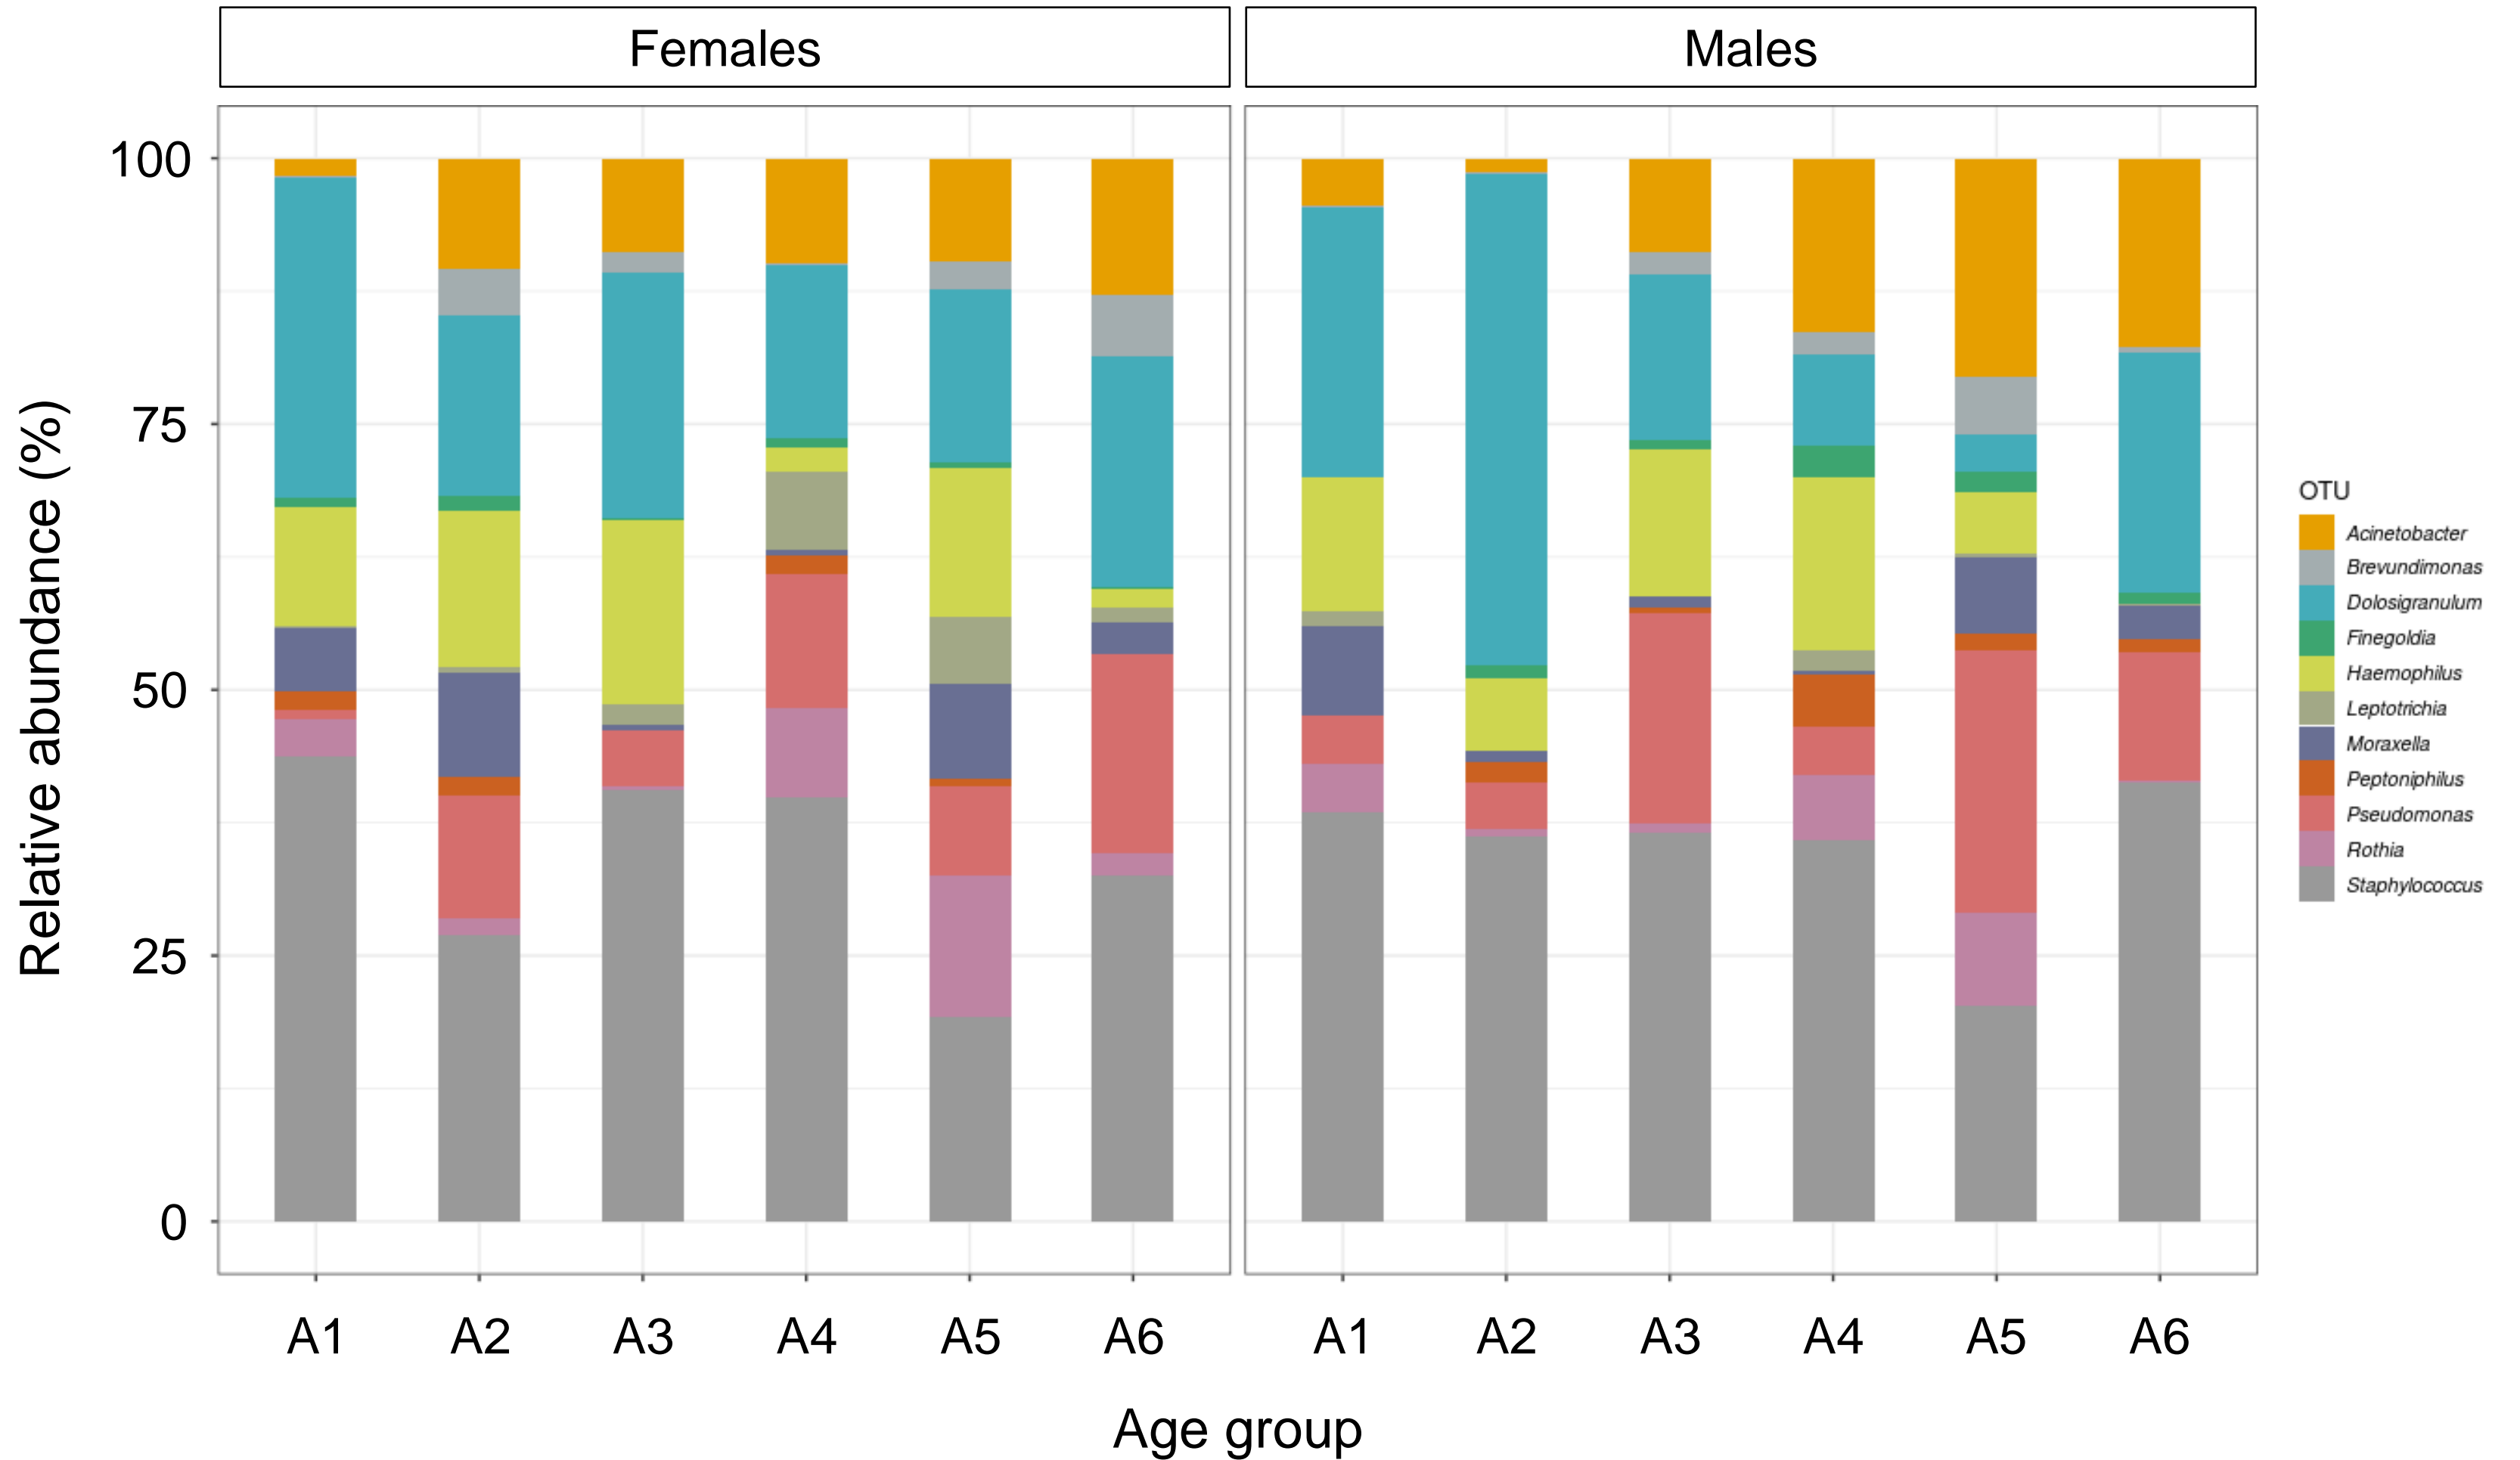

# Figure S9

medRxiv preprint doi: <https://doi.org/10.1101/2022.06.26.22276913>; this version posted June 27, 2022. The copyright holder for this preprint (which was not certified by peer review) is the author/funder, who has granted medRxiv a license to display the preprint in perpetuity. It is made available under a [CC-BY-NC-ND 4.0 International license](https://creativecommons.org/licenses/by-nc-nd/4.0/).

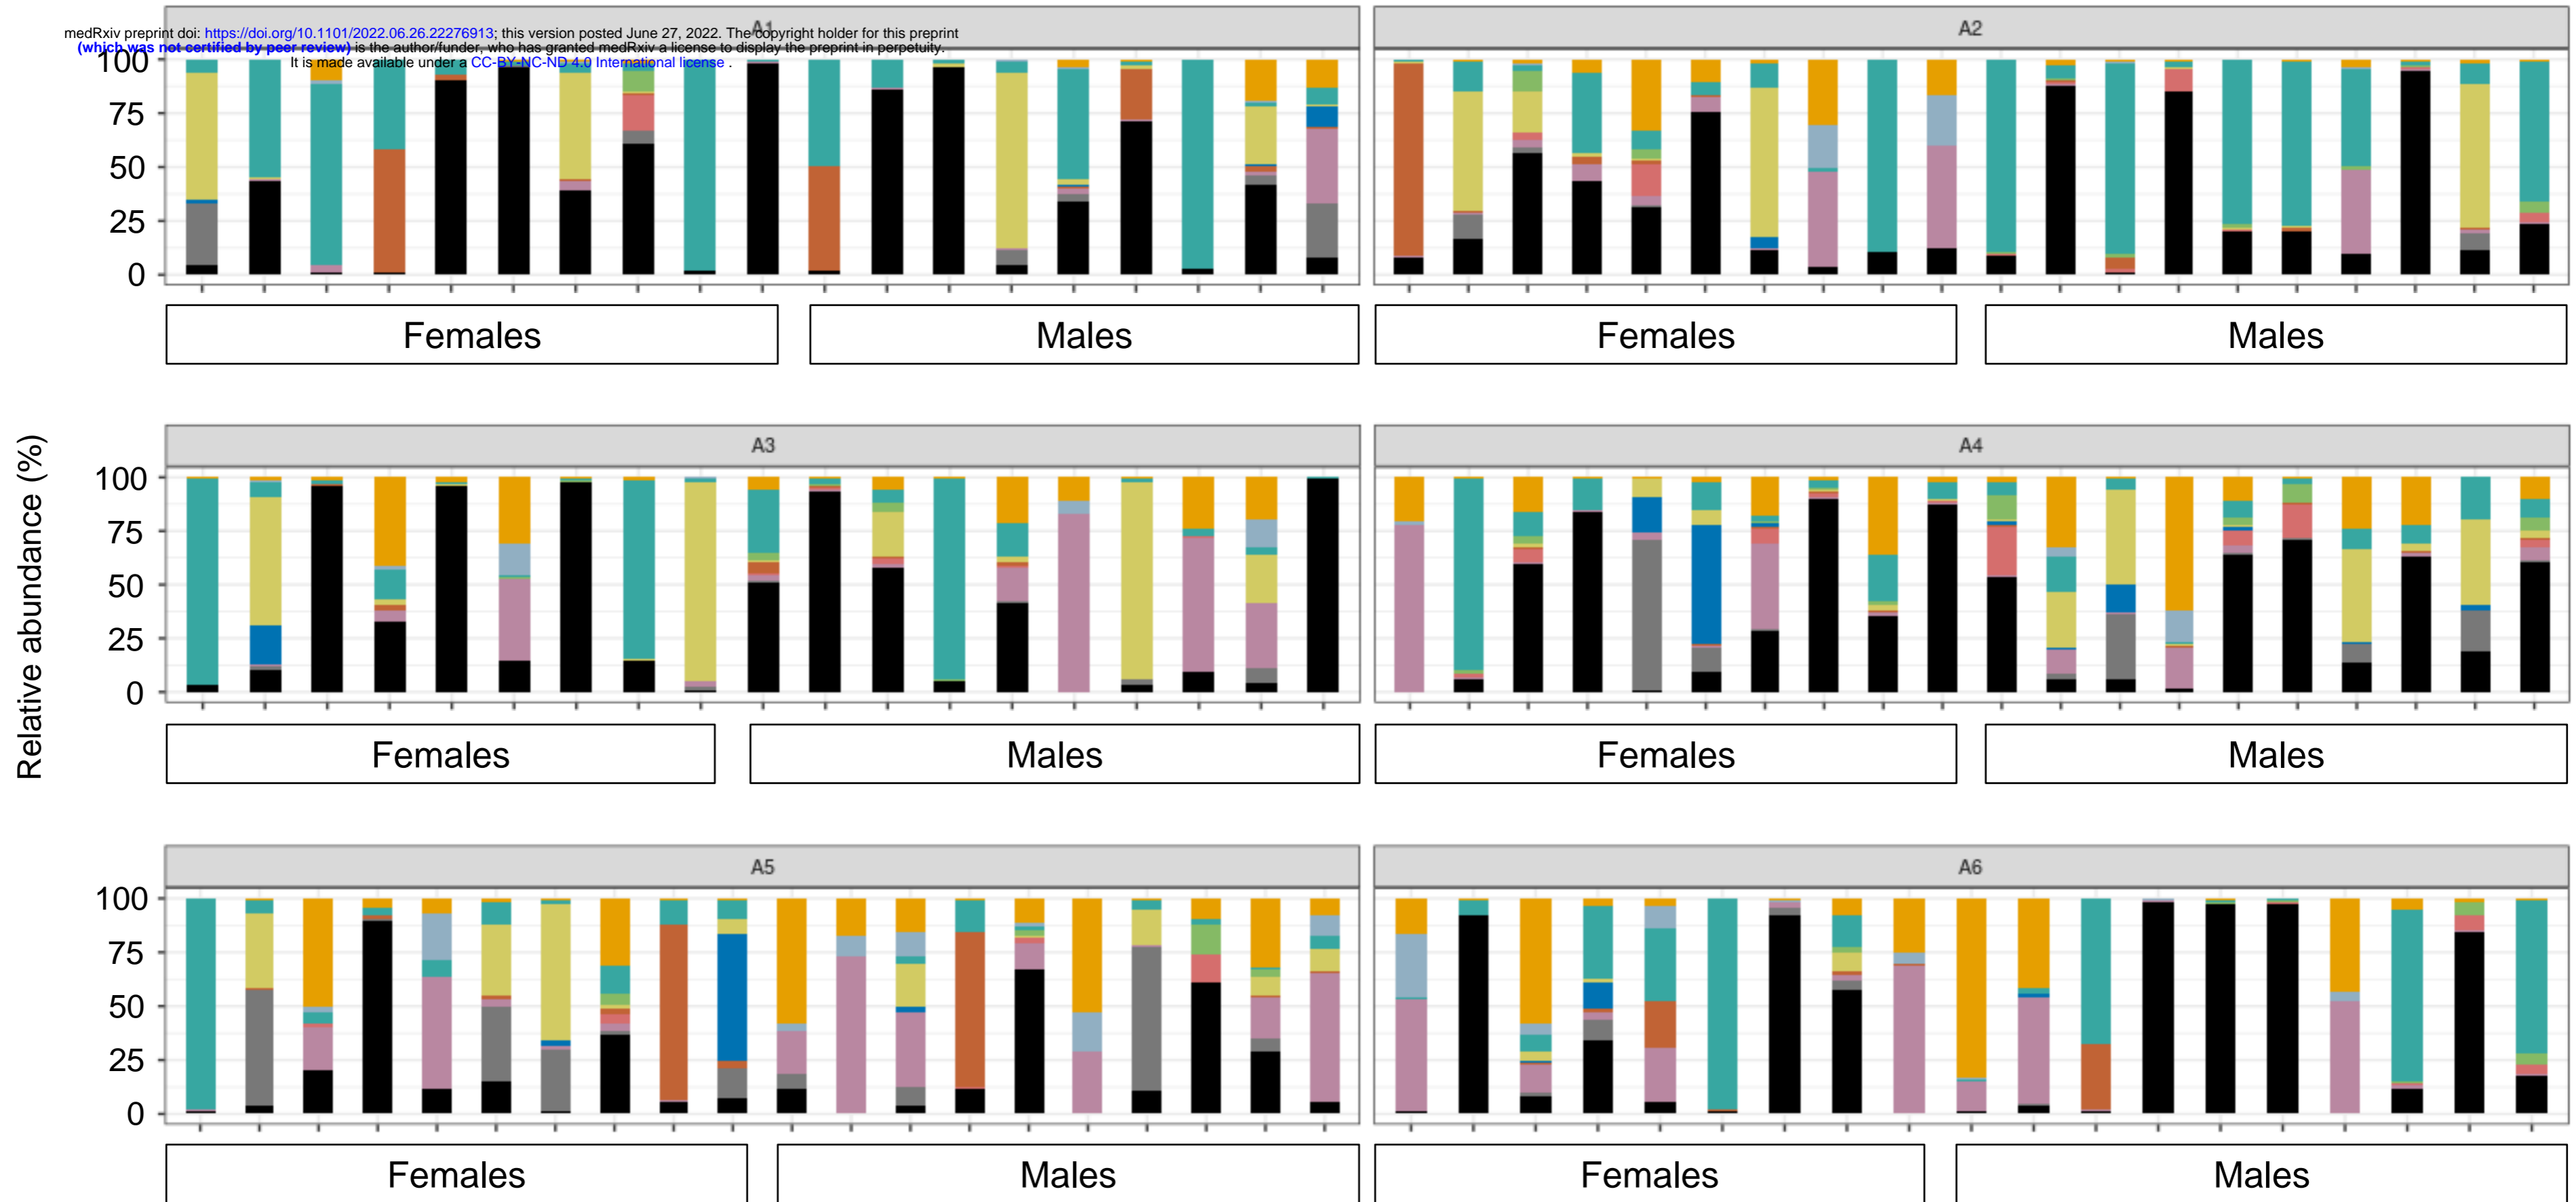

# Figure S10

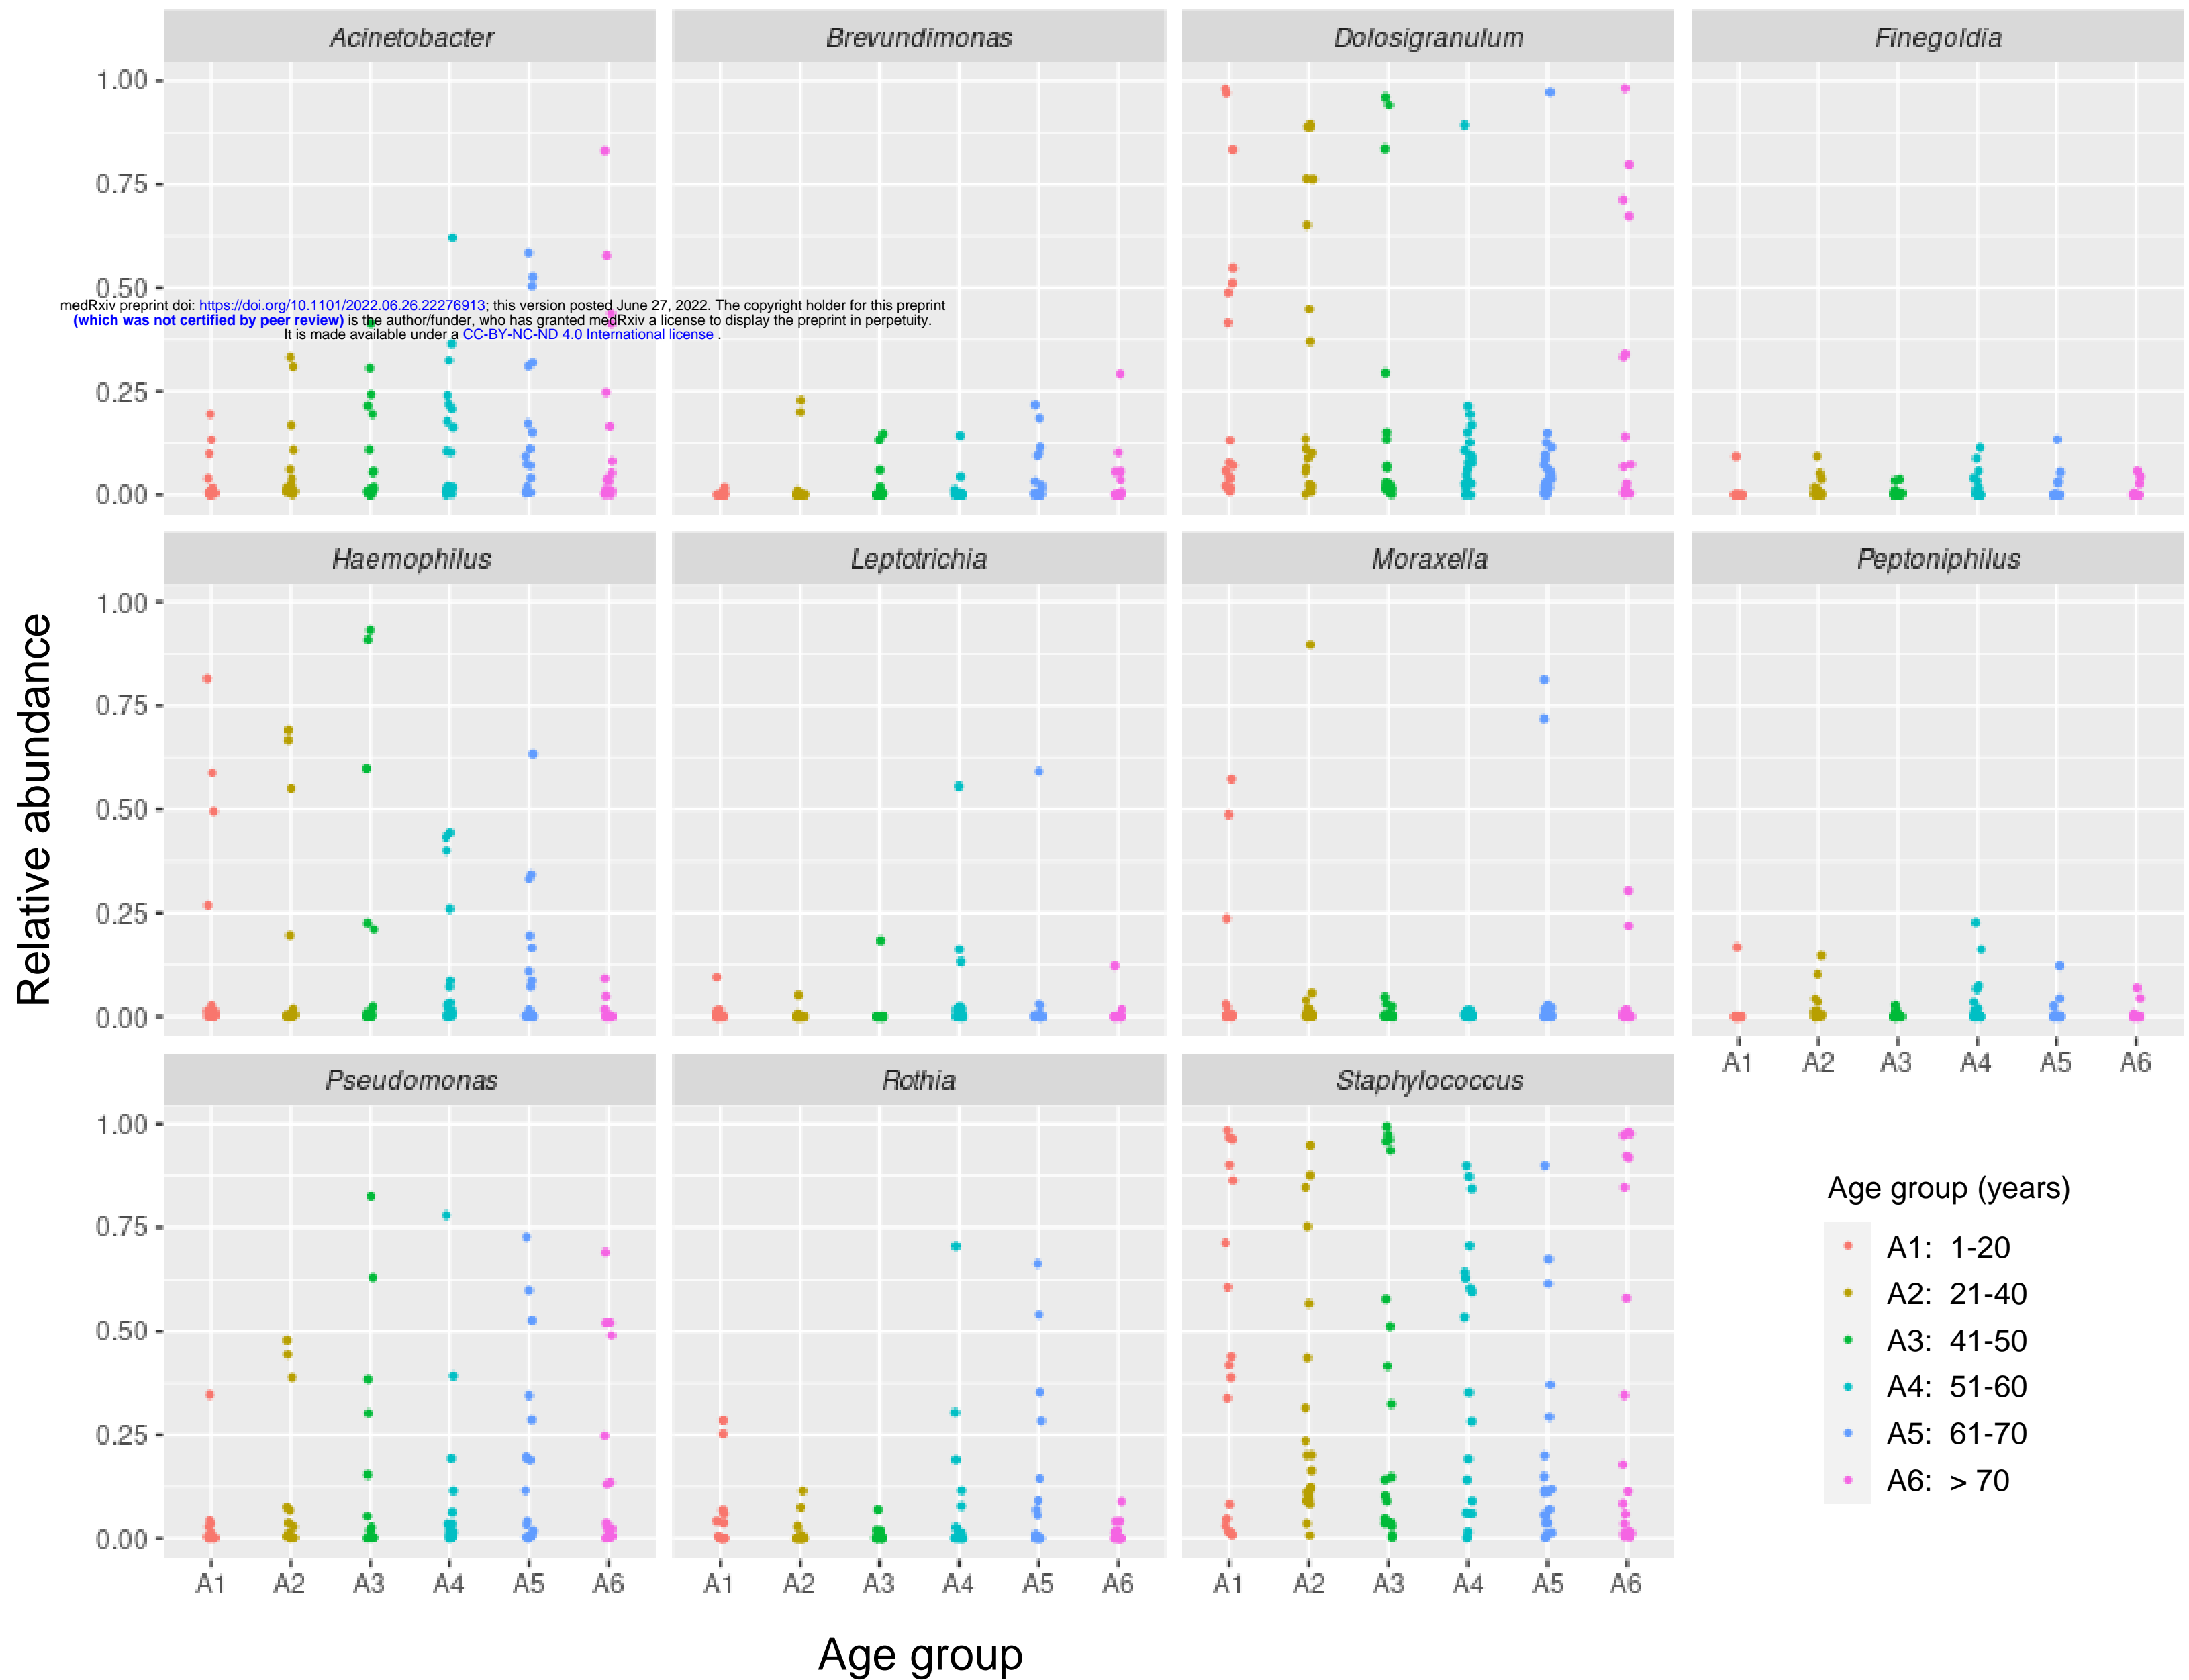



**Table S1.** Nasopharyngeal exudate samples collected from healthy (not infected with SARS-CoV-2) males and females in each age group

| <b>Age group</b> | <b>Sex</b>    | <b>Samples</b> |
|------------------|---------------|----------------|
| A1: 1-20 years   | <i>Female</i> | 10             |
|                  | <i>Male</i>   | 9              |
| A2: 21-40 years  | <i>Female</i> | 10             |
|                  | <i>Male</i>   | 10             |
| A3: 41-50 years  | <i>Female</i> | 10             |
|                  | <i>Male</i>   | 10             |
| A4: 51-60 years  | <i>Female</i> | 10             |
|                  | <i>Male</i>   | 10             |
| A5: 61-70 years  | <i>Female</i> | 10             |
|                  | <i>Male</i>   | 10             |
| A6: >70 years    | <i>Female</i> | 10             |
|                  | <i>Male</i>   | 10             |
| Total            | <i>Female</i> | 60             |
|                  | <i>Male</i>   | 59             |

**Table S2.** Summary of the statistical analysis of the relative abundance differences among the 6 age groups established in this study.

Only the statistically significant differences (adjusted p-value < 0.05) for the 11 bacterial genera which present such differences are shown

| Genus                 | baseMean  | log2FoldChange | lfcSE | stat   | Adjusted p-value | Age groups compared |
|-----------------------|-----------|----------------|-------|--------|------------------|---------------------|
| <i>Acinetobacter</i>  | 848,877   | -2,463         | 0,664 | -3,71  | 0,009            | A1_A6               |
|                       |           | -2,866         | 0,655 | -4,374 | 0,003            | A2_A6               |
|                       |           | 2,378          | 0,655 | 3,629  | 0,02             | A3_A4               |
|                       |           | -3,688         | 0,655 | -5,628 | 0                | A4_A6               |
|                       |           | -2,338         | 0,655 | -3,57  | 0,019            | A5_A6               |
| <i>Brevundimonas</i>  | 129,952   | -5,191         | 1,366 | -3,799 | 0,01             | A1_A2               |
|                       |           | -5,772         | 1,383 | -4,173 | 0,002            | A1_A6               |
| <i>Dolosigranulum</i> | 16684,133 | 5,033          | 0,977 | 5,154  | 0                | A1_A4               |
|                       |           | 3,581          | 0,964 | 3,714  | 0,021            | A2_A4               |
|                       |           | 4,244          | 0,977 | 4,346  | 0,001            | A3_A4               |
|                       |           | -4,553         | 0,977 | -4,662 | 0                | A4_A6               |
| <i>Finegoldia</i>     | 50,796    | -5,379         | 1,527 | -3,523 | 0,022            | A1_A2               |
| <i>Haemophilus</i>    | 450,095   | 3,981          | 0,961 | 4,141  | 0,002            | A1_A6               |
|                       |           | 4,733          | 0,961 | 4,925  | 0                | A3_A6               |
|                       |           | 4,461          | 0,949 | 4,701  | 0                | A5_A6               |
| <i>Leptotrichia</i>   | 21,087    | 8,756          | 2,111 | 4,148  | 0,005            | A1_A3               |
|                       |           | -10,723        | 2,08  | -5,156 | 0                | A3_A4               |
|                       |           | -10,303        | 2,08  | -4,953 | 0                | A3_A5               |
|                       |           | -7,858         | 2,112 | -3,72  | 0,021            | A3_A6               |
| <i>Moraxella</i>      | 90,658    | 3,938          | 0,991 | 3,973  | 0,004            | A1_A4               |
| <i>Peptoniphilus</i>  | 55,534    | -7,681         | 1,739 | -4,416 | 0,001            | A1_A2               |
|                       |           | -7,135         | 1,739 | -4,103 | 0,003            | A1_A4               |
|                       |           | -6,649         | 1,761 | -3,776 | 0,008            | A1_A6               |
| <i>Pseudomonas</i>    | 2779,023  | -4,48          | 0,933 | -4,799 | 0                | A1_A2               |

|                       |          |        |       |        |       |       |
|-----------------------|----------|--------|-------|--------|-------|-------|
|                       |          | -3,823 | 0,945 | -4,044 | 0,005 | A1_A3 |
|                       |          | -5,261 | 0,945 | -5,566 | 0     | A1_A6 |
|                       |          | 3,676  | 0,921 | 3,994  | 0,014 | A2_A4 |
|                       |          | -4,458 | 0,933 | -4,781 | 0     | A4_A6 |
| <i>Rothia</i>         | 115,404  | -5,551 | 1,281 | -4,332 | 0,003 | A2_A5 |
|                       |          | -4,724 | 1,294 | -3,65  | 0,027 | A3_A5 |
|                       |          | 5,027  | 1,296 | 3,878  | 0,007 | A5_A6 |
| <i>Staphylococcus</i> | 8272,167 | 2,477  | 0,721 | 3,434  | 0,025 | A1_A2 |
|                       |          | 2,635  | 0,73  | 3,608  | 0,021 | A1_A3 |
|                       |          | 3,539  | 0,721 | 4,908  | 0     | A1_A4 |
|                       |          | 4,078  | 0,721 | 5,656  | 0     | A1_A5 |
|                       |          | -2,865 | 0,721 | -3,974 | 0,004 | A4_A6 |
|                       |          | -3,405 | 0,721 | -4,722 | 0     | A5_A6 |
